# Supplementary material for: Aminoalcohol derivatives by nickel-catalyzed enantioselective coupling of imines and dienol ethers
Source: Royal Society of Chemistry journal article supplement (doi:10.1039/d3cc04582j), 2023-01-01
Supplement: d3cc04582j1.pdf [file d3cc04582j1.pdf]

## Supporting Information

### Aminoalcohol derivatives by nickel-catalyzed enantioselective coupling of imines and dienol ethers

Jae Yeon Kim, Thomas Q. Davies and Alois Fürstner\*

*Max-Planck-Institut für Kohlenforschung, 45470 Mülheim/Ruhr, Germany*

*Email: fuerstner@kofo.mpg.de*

### Table of Contents

|                                                                          |      |
|--------------------------------------------------------------------------|------|
| <b>Supporting Crystallographic Information</b> .....                     | S2   |
| <b>Reaction Optimization</b> .....                                       | S7   |
| <b>Limitations</b> .....                                                 | S7   |
| <b>General Considerations</b> .....                                      | S8   |
| <b>Characterization Data of the Substrates</b> .....                     | S9   |
| <b>Ni-catalyzed Reductive Coupling of Dienol Ethers and Imines</b> ..... | S14  |
| <b>Representative Procedure A</b> .....                                  | S14  |
| <b>Representative Procedure B</b> .....                                  | S43  |
| <b>Representative Procedure C</b> .....                                  | S59  |
| <b>Assignment of the Absolute and Relative Configuration</b> .....       | S66  |
| <b>Synthetic Applications</b> .....                                      | S67  |
| <b>NMR Spectra</b> .....                                                 | S72  |
| <b>References</b> .....                                                  | S101 |

## Supporting Crystallographic Information

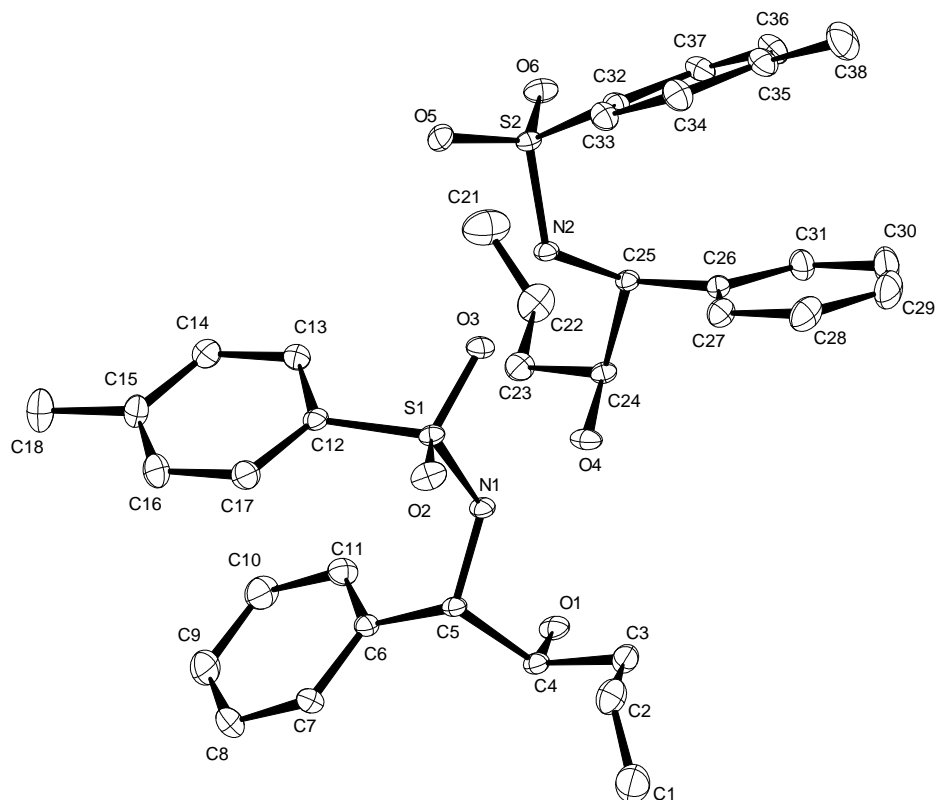

**Figure S1.** Structure of compound **12** in the solid state; H-atoms are removed for clarity. Atomic displacement ellipsoids are shown at the 50% probability level.

**X-ray Crystal Structure Analysis of Compound 12:**  $C_{18}H_{21}NO_3S$ ,  $M_r = 331.42 \text{ g mol}^{-1}$ , colourless plate, crystal size  $0.493 \times 0.321 \times 0.06 \text{ mm}^3$ , triclinic, space group  $P1$  [1],  $a = 7.7766(4) \text{ \AA}$ ,  $b = 10.4591(5) \text{ \AA}$ ,  $c = 11.6939(6) \text{ \AA}$ ,  $\alpha = 63.794(2)^\circ$ ,  $\beta = 86.998(2)^\circ$ ,  $\gamma = 89.877(2)^\circ$ ,  $V = 851.97(8) \text{ \AA}^3$ ,  $T = 100(2) \text{ K}$ ,  $Z = 2$ ,  $D_{calc} = 1.292 \text{ g}\cdot\text{cm}^3$ ,  $\lambda = 0.71073 \text{ \AA}$ ,  $\mu(Mo-K_\alpha) = 0.204 \text{ mm}^{-1}$ , numerical absorption correction ( $T_{min} = 0.9363$ ,  $T_{max} = 0.9974$ ), Bruker AXS D8-Venture diffractometer with  $I\mu S$  Diamond Mo-anode X-ray source and PHOTON III detector,  $1.944 < \theta < 34.202^\circ$ , 145574 measured reflections, 14138 independent reflections, 13864 reflections with  $I > 2\sigma(I)$ ,  $R_{int} = 0.0379$ .

The structure was solved by *SHELXT* and refined by full-matrix least-squares (*SHELXL*) against  $F^2$  to  $R_1 = 0.0261$  [ $I > 2\sigma(I)$ ],  $wR_2 = 0.0708$  [all data], 433 parameters, 3 restraints and an absolute structure parameter Flack  $x = 0.008(8)$ .

Full .cif data for the compound are available under the number **CCDC-2294750**

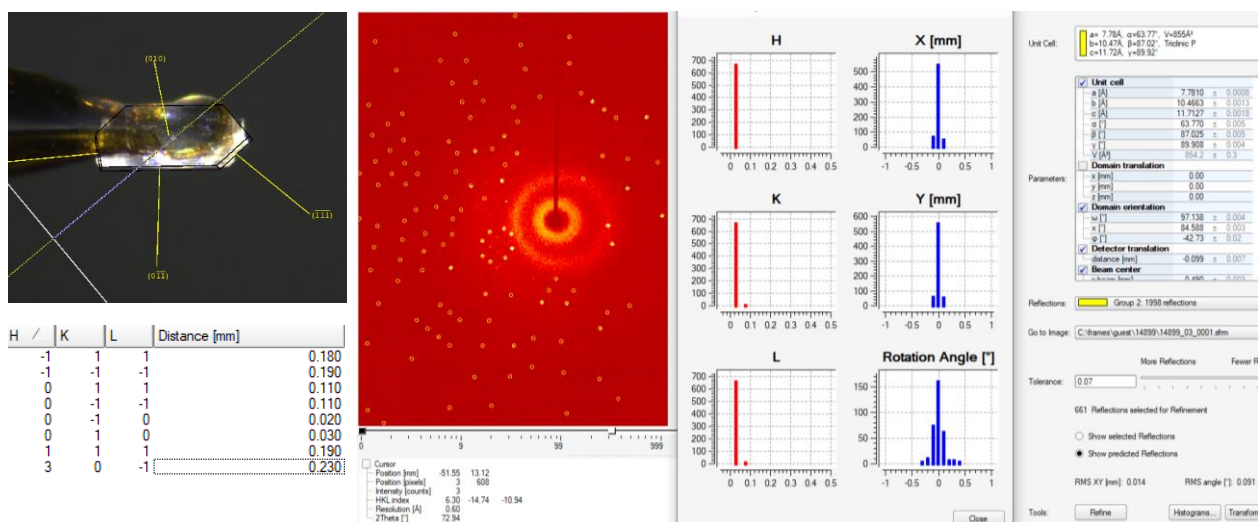

**Figure S1.** Crystal faces and unit cell determination/refinement of compound **12**

#### INTENSITY STATISTICS FOR DATASET

| Resolution | #Data | #Theory | %Complete | Redundancy | Mean I | Mean I/s | Rmerge | Rsigma |        |
|------------|-------|---------|-----------|------------|--------|----------|--------|--------|--------|
| Inf        | 2.53  | 213     | 218       | 97.7       | 14.61  | 90.26    | 103.41 | 0.0247 | 0.0204 |
| 2.53       | 1.70  | 498     | 498       | 100.0      | 17.63  | 36.75    | 107.34 | 0.0234 | 0.0097 |
| 1.70       | 1.36  | 712     | 712       | 100.0      | 17.53  | 18.05    | 89.15  | 0.0271 | 0.0095 |
| 1.36       | 1.18  | 738     | 738       | 100.0      | 15.03  | 19.66    | 79.25  | 0.0289 | 0.0105 |
| 1.18       | 1.08  | 678     | 678       | 100.0      | 12.81  | 15.24    | 65.96  | 0.0316 | 0.0123 |
| 1.08       | 1.00  | 716     | 716       | 100.0      | 11.85  | 10.05    | 55.65  | 0.0371 | 0.0150 |
| 1.00       | 0.94  | 740     | 740       | 100.0      | 11.19  | 7.83     | 48.03  | 0.0431 | 0.0173 |
| 0.94       | 0.89  | 768     | 768       | 100.0      | 10.83  | 6.49     | 43.06  | 0.0482 | 0.0195 |
| 0.89       | 0.85  | 736     | 736       | 100.0      | 10.14  | 5.67     | 37.42  | 0.0538 | 0.0224 |
| 0.85       | 0.82  | 680     | 680       | 100.0      | 9.94   | 5.23     | 34.80  | 0.0565 | 0.0240 |
| 0.82       | 0.79  | 760     | 760       | 100.0      | 9.67   | 4.65     | 31.45  | 0.0620 | 0.0264 |
| 0.79       | 0.77  | 566     | 566       | 100.0      | 8.87   | 4.74     | 30.10  | 0.0645 | 0.0284 |
| 0.77       | 0.74  | 1002    | 1002      | 100.0      | 8.49   | 4.44     | 26.68  | 0.0655 | 0.0309 |
| 0.74       | 0.72  | 732     | 732       | 100.0      | 8.44   | 3.87     | 24.25  | 0.0720 | 0.0341 |
| 0.72       | 0.71  | 418     | 418       | 100.0      | 8.33   | 3.42     | 22.11  | 0.0809 | 0.0372 |
| 0.71       | 0.69  | 868     | 868       | 100.0      | 8.01   | 3.57     | 22.06  | 0.0786 | 0.0386 |
| 0.69       | 0.68  | 554     | 554       | 100.0      | 8.01   | 3.15     | 20.02  | 0.0868 | 0.0428 |
| 0.68       | 0.66  | 1034    | 1034      | 100.0      | 7.74   | 2.79     | 17.84  | 0.0982 | 0.0482 |
| 0.66       | 0.65  | 518     | 518       | 100.0      | 7.48   | 2.62     | 16.51  | 0.1059 | 0.0527 |
| 0.65       | 0.64  | 698     | 698       | 100.0      | 7.42   | 2.63     | 16.16  | 0.1094 | 0.0545 |
| 0.64       | 0.63  | 509     | 536       | 95.0       | 5.73   | 2.32     | 12.94  | 0.1299 | 0.0723 |
| 0.73       | 0.63  | 4967    | 4994      | 99.5       | 7.62   | 3.00     | 18.69  | 0.0923 | 0.0465 |
| Inf        | 0.63  | 14138   | 14170     | 99.8       | 10.27  | 9.05     | 40.43  | 0.0378 | 0.0196 |

**Table S1.** Crystal data and structure refinement of compound **12**

|                                   |                                                    |                          |
|-----------------------------------|----------------------------------------------------|--------------------------|
| Identification code               | 14899                                              |                          |
| Empirical formula                 | C <sub>18</sub> H <sub>21</sub> N O <sub>3</sub> S |                          |
| Color                             | colourless                                         |                          |
| Formula weight                    | 331.42 g · mol <sup>-1</sup>                       |                          |
| Temperature                       | 100(2) K                                           |                          |
| Wavelength                        | 0.71073 Å                                          |                          |
| Crystal system                    | Triclinic                                          |                          |
| Space group                       | P1, (no. 1)                                        |                          |
| Unit cell dimensions              | a = 7.7766(4) Å                                    | α = 63.794(2)°.          |
|                                   | b = 10.4591(5) Å                                   | β = 86.998(2)°.          |
|                                   | c = 11.6939(6) Å                                   | γ = 89.877(2)°.          |
| Volume                            | 851.97(8) Å <sup>3</sup>                           |                          |
| Z                                 | 2                                                  |                          |
| Density (calculated)              | 1.292 Mg · m <sup>-3</sup>                         |                          |
| Absorption coefficient            | 0.204 mm <sup>-1</sup>                             |                          |
| F(000)                            | 352 e                                              |                          |
| Crystal size                      | 0.493 x 0.321 x 0.06 mm <sup>3</sup>               |                          |
| θ range for data collection       | 1.944 to 34.202°.                                  |                          |
| Index ranges                      | -12 ≤ h ≤ 12, -16 ≤ k ≤ 16, -18 ≤ l ≤ 18           |                          |
| Reflections collected             | 145574                                             |                          |
| Independent reflections           | 14138 [R <sub>int</sub> = 0.0379]                  |                          |
| Reflections with I > 2σ(I)        | 13864                                              |                          |
| Completeness to θ = 25.242°       | 100.0 %                                            |                          |
| Absorption correction             | Semi-empirical from equivalents                    |                          |
| Max. and min. transmission        | 1.00 and 0.94                                      |                          |
| Refinement method                 | Full-matrix least-squares on F <sup>2</sup>        |                          |
| Data / restraints / parameters    | 14138 / 3 / 433                                    |                          |
| Goodness-of-fit on F <sup>2</sup> | 1.083                                              |                          |
| Final R indices [I > 2σ(I)]       | R <sub>1</sub> = 0.0261                            | wR <sup>2</sup> = 0.0704 |
| R indices (all data)              | R <sub>1</sub> = 0.0268                            | wR <sup>2</sup> = 0.0708 |
| Absolute structure parameter      | 0.008(8)                                           |                          |
| Largest diff. peak and hole       | 0.5 and -0.2 e · Å <sup>-3</sup>                   |                          |

**Table S2.** Bond lengths [Å] and angles [°] of compound **12**

|                 |            |                 |            |
|-----------------|------------|-----------------|------------|
| S(1)-O(2)       | 1.4367(9)  | S(1)-O(3)       | 1.4528(9)  |
| S(1)-N(1)       | 1.6098(10) | S(1)-C(12)      | 1.7588(12) |
| O(1)-H(1)       | 0.76(3)    | O(1)-C(4)       | 1.4263(14) |
| N(1)-H(1A)      | 0.83(2)    | N(1)-C(5)       | 1.4719(14) |
| C(1)-C(2)       | 1.326(2)   | C(2)-C(3)       | 1.4960(19) |
| C(3)-C(4)       | 1.5315(17) | C(4)-C(5)       | 1.5358(16) |
| C(5)-C(6)       | 1.5199(15) | C(6)-C(7)       | 1.3940(16) |
| C(6)-C(11)      | 1.3926(16) | C(7)-C(8)       | 1.3898(19) |
| C(8)-C(9)       | 1.383(2)   | C(9)-C(10)      | 1.393(2)   |
| C(10)-C(11)     | 1.3943(18) | C(12)-C(13)     | 1.3932(16) |
| C(12)-C(17)     | 1.3907(16) | C(13)-C(14)     | 1.3895(17) |
| C(14)-C(15)     | 1.3933(19) | C(15)-C(16)     | 1.396(2)   |
| C(15)-C(18)     | 1.503(2)   | C(16)-C(17)     | 1.3858(19) |
| S(2)-O(5)       | 1.4388(9)  | S(2)-O(6)       | 1.4360(10) |
| S(2)-N(2)       | 1.6254(10) | S(2)-C(32)      | 1.7604(11) |
| O(4)-H(4A)      | 0.73(3)    | O(4)-C(24)      | 1.4222(14) |
| N(2)-H(2A)      | 0.82(3)    | N(2)-C(25)      | 1.4694(14) |
| C(21)-C(22)     | 1.326(2)   | C(22)-C(23)     | 1.497(2)   |
| C(23)-C(24)     | 1.5258(17) | C(24)-C(25)     | 1.5284(16) |
| C(25)-C(26)     | 1.5166(15) | C(26)-C(27)     | 1.3938(16) |
| C(26)-C(31)     | 1.3932(16) | C(27)-C(28)     | 1.3942(17) |
| C(28)-C(29)     | 1.390(2)   | C(29)-C(30)     | 1.387(2)   |
| C(30)-C(31)     | 1.3887(19) | C(32)-C(33)     | 1.3907(16) |
| C(32)-C(37)     | 1.3958(17) | C(33)-C(34)     | 1.3924(17) |
| C(34)-C(35)     | 1.3938(18) | C(35)-C(36)     | 1.3964(19) |
| C(35)-C(38)     | 1.5056(18) | C(36)-C(37)     | 1.3888(17) |
| O(2)-S(1)-O(3)  | 119.27(6)  | O(2)-S(1)-N(1)  | 108.57(5)  |
| O(2)-S(1)-C(12) | 107.68(6)  | O(3)-S(1)-N(1)  | 105.09(5)  |
| O(3)-S(1)-C(12) | 107.27(5)  | N(1)-S(1)-C(12) | 108.59(5)  |
| C(4)-O(1)-H(1)  | 107.4(18)  | S(1)-N(1)-H(1A) | 114.9(15)  |
| C(5)-N(1)-S(1)  | 121.98(7)  | C(5)-N(1)-H(1A) | 117.7(15)  |
| C(1)-C(2)-C(3)  | 123.47(14) | C(2)-C(3)-C(4)  | 112.69(10) |
| O(1)-C(4)-C(3)  | 110.18(10) | O(1)-C(4)-C(5)  | 106.63(9)  |
| C(3)-C(4)-C(5)  | 114.26(9)  | N(1)-C(5)-C(4)  | 108.56(9)  |
| N(1)-C(5)-C(6)  | 114.99(9)  | C(6)-C(5)-C(4)  | 110.24(9)  |
| C(7)-C(6)-C(5)  | 118.58(10) | C(11)-C(6)-C(5) | 122.29(10) |

|                   |            |                   |            |
|-------------------|------------|-------------------|------------|
| C(11)-C(6)-C(7)   | 119.08(11) | C(8)-C(7)-C(6)    | 121.03(13) |
| C(9)-C(8)-C(7)    | 119.65(13) | C(8)-C(9)-C(10)   | 119.94(13) |
| C(9)-C(10)-C(11)  | 120.33(13) | C(6)-C(11)-C(10)  | 119.93(12) |
| C(13)-C(12)-S(1)  | 119.63(9)  | C(17)-C(12)-S(1)  | 119.15(9)  |
| C(17)-C(12)-C(13) | 120.99(11) | C(14)-C(13)-C(12) | 118.69(11) |
| C(13)-C(14)-C(15) | 121.37(12) | C(14)-C(15)-C(16) | 118.63(12) |
| C(14)-C(15)-C(18) | 120.73(14) | C(16)-C(15)-C(18) | 120.63(13) |
| C(17)-C(16)-C(15) | 120.94(12) | C(16)-C(17)-C(12) | 119.29(12) |
| O(5)-S(2)-N(2)    | 105.13(5)  | O(5)-S(2)-C(32)   | 108.12(5)  |
| O(6)-S(2)-O(5)    | 120.04(6)  | O(6)-S(2)-N(2)    | 107.49(5)  |
| O(6)-S(2)-C(32)   | 107.74(6)  | N(2)-S(2)-C(32)   | 107.79(5)  |
| C(24)-O(4)-H(4A)  | 109.8(18)  | S(2)-N(2)-H(2A)   | 111.0(18)  |
| C(25)-N(2)-S(2)   | 120.32(7)  | C(25)-N(2)-H(2A)  | 116.9(18)  |
| C(21)-C(22)-C(23) | 124.63(16) | C(22)-C(23)-C(24) | 112.87(11) |
| O(4)-C(24)-C(23)  | 110.04(10) | O(4)-C(24)-C(25)  | 107.11(9)  |
| C(23)-C(24)-C(25) | 113.73(10) | N(2)-C(25)-C(24)  | 108.42(9)  |
| N(2)-C(25)-C(26)  | 114.48(9)  | C(26)-C(25)-C(24) | 111.87(9)  |
| C(27)-C(26)-C(25) | 122.16(10) | C(31)-C(26)-C(25) | 118.91(10) |
| C(31)-C(26)-C(27) | 118.93(10) | C(26)-C(27)-C(28) | 120.06(12) |
| C(29)-C(28)-C(27) | 120.46(13) | C(30)-C(29)-C(28) | 119.65(12) |
| C(29)-C(30)-C(31) | 119.89(13) | C(30)-C(31)-C(26) | 120.98(12) |
| C(33)-C(32)-S(2)  | 119.69(9)  | C(33)-C(32)-C(37) | 120.74(11) |
| C(37)-C(32)-S(2)  | 119.32(9)  | C(32)-C(33)-C(34) | 119.13(11) |
| C(33)-C(34)-C(35) | 121.11(11) | C(34)-C(35)-C(36) | 118.77(11) |
| C(34)-C(35)-C(38) | 120.99(12) | C(36)-C(35)-C(38) | 120.24(12) |
| C(37)-C(36)-C(35) | 120.97(11) | C(36)-C(37)-C(32) | 119.27(11) |

---

## Reaction Optimization

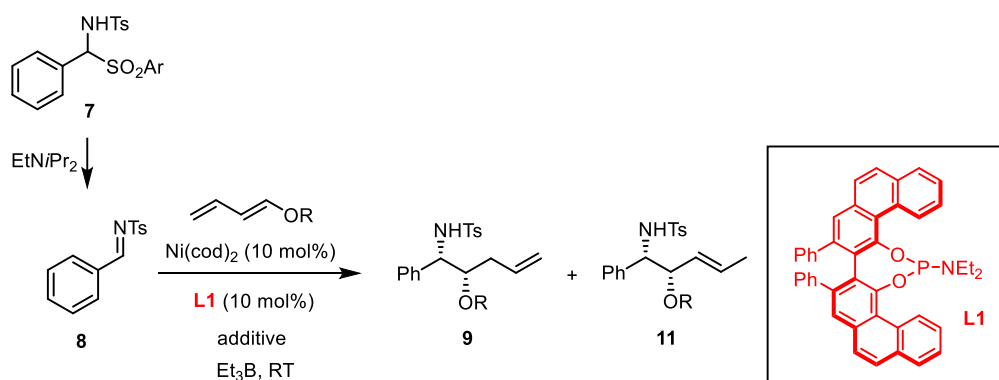

**Table S3.** Screening Results

| ## | Substrate                     | R (diene) | Solvent               | Additive                              | Yield | 9:11  | ee (major) |
|----|-------------------------------|-----------|-----------------------|---------------------------------------|-------|-------|------------|
| 1  | <b>7</b> (Ar = Ph)            | TES       | THF                   | ---                                   | 40%   | 3.9:1 | 94%        |
| 2  |                               | TBS       | THF                   | ---                                   | 53%   | 4.7:1 | 94%        |
| 3  |                               |           | toluene               | ---                                   | 52%   | 4.0:1 | 92%        |
| 4  |                               |           | DMF                   | ---                                   | trace | n.d.  |            |
| 5  |                               |           | $\text{Et}_2\text{O}$ | ---                                   | 8%    | n.d.  | 91%        |
| 6  | <b>7</b> (Ar = <i>p</i> -tol) | MOM       | THF                   | ---                                   | 40%   | 9.0:1 | 92%        |
| 7  | <b>7</b> (Ar = <i>p</i> -tol) | TES       | THF                   | $\text{H}_2\text{O}$ (1 equiv.)       | 70%   | 5.2:1 | 92%        |
| 8  |                               |           |                       | $\text{H}_2\text{O}$ (2 equiv.)       | 85%   | 7.3:1 | 93%        |
| 9  |                               |           |                       | $\text{H}_2\text{O}$ (3 equiv.)       | 91%   | 8.7:1 | 93%        |
| 10 | <b>7</b> (Ar = <i>p</i> -tol) | TBS       | THF                   | $\text{H}_2\text{O}$ (3 equiv.)       | 75%   | 7.6:1 | 94%        |
| 11 | <b>7</b> (Ar = <i>p</i> -tol) | TIPS      | THF                   | $\text{H}_2\text{O}$ (3 equiv.)       | 70%   | >20:1 | 92%        |
| 12 | <b>8</b>                      |           |                       | MeOH (3 equiv.)                       | 47%   | >20:1 | 79%        |
| 13 | <b>8</b>                      |           |                       | HFIP (3 equiv.)                       | 28%   | >20:1 | 85%        |
| 14 | <b>8</b>                      |           |                       | $(\text{EtO})_3\text{B}$ (1.5 equiv.) | <5%   | n.d.  | n.d.       |
| 15 | <b>8</b>                      | TIPS      | THF                   | $\text{H}_2\text{O}$ (3 equiv.)       | 93%   | >20:1 | 90%        |
| 16 | <b>8</b>                      | MOM       | THF                   | $\text{H}_2\text{O}$ (3 equiv.)       | 87%   | >20:1 | 90%        |
| 17 | <b>8</b>                      | Bn        | THF                   | $\text{H}_2\text{O}$ (3 equiv.)       | 81%   | 4.0:1 | 89%        |

n. d. = not determined; HFIP = hexafluoroisopropanol

## Limitations

unsuccessful substrates:

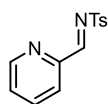

no reaction

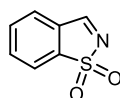

no reaction

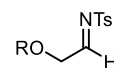

R = TBS, TBDPS, TIPS, tBu  
unstable

## General Considerations

Unless stated otherwise, all reactions were carried out under argon atmosphere in flame-dried Schlenk glassware. Solvents were purified by distillation over the indicated drying agents under argon: toluene (CaH<sub>2</sub>), THF (Mg/anthracene), Et<sub>2</sub>O (Mg/anthracene), pentane (Na/K), CH<sub>2</sub>Cl<sub>2</sub> (CaH<sub>2</sub>). MeCN and Et<sub>3</sub>N were dried by an absorption solvent purification system based on molecular sieves. Flash chromatography: VWR Chemicals silica gel 40 – 63 μm.

NMR spectra were recorded on Bruker DPX 300 or AV 400 spectrometers in the solvents indicated; chemical shifts are given in ppm relative to TMS, coupling constants (*J*) in Hz. The solvent signals were used as references and the chemical shifts converted to the TMS scale (CDCl<sub>3</sub>: δ<sub>C</sub> = 77.16 ppm; δ<sub>H</sub> = 7.26 ppm; C<sub>6</sub>D<sub>6</sub>: δ<sub>C</sub> = 128.06 ppm; δ<sub>H</sub> = 7.16 ppm; CD<sub>2</sub>Cl<sub>2</sub>: δ<sub>C</sub> = 54.0 ppm; δ<sub>H</sub> = 5.32 ppm). Proton and carbon assignments were established using HSQC, HMBC and NOESY experiments, where necessary.

IR: Alpha Platinum ATR (Bruker), wavenumbers ( $\tilde{\nu}$ ) in cm<sup>-1</sup>.

MS (EI): Finnigan MAT 8200 (70 eV), ESI-MS: ESQ3000 (Bruker), Thermo Scientific LTQ-FT, or Thermo Scientific Exactive. HRMS: Bruker APEX III FT-MS (7T magnet), MAT 95 (Finnigan), Thermo Scientific LTQ-FT, or Thermo Scientific Exactive. GC-MS: Shimadzu GCMS-QP2010 Ultra instrument.

HPLC analyses for the determination of enantiomeric excesses were conducted on a Shimadzu LC 2020 instrument equipped with a Shimadzu SPD-M20A UV/VIS detector. Solvents (HPLC grade) were purchased and used as received. The exact conditions are stated separately for each compound.

Optical rotations were measured with an A-Krüss Otronic Model P8000-t polarimeter at a wavelength of 589 nm. The values are given as specific optical rotation with exact temperature, concentration (*c* (10 mg/mL)) and solvent.

Aldehydes were purchased from commercial suppliers and used as received. Unless stated otherwise, all other commercially available compounds (abcr, Acros, TCI, Aldrich, Alfa Aesar, Fluorochem) were used as received.

The phosphoramidite ligand **L1**,<sup>1</sup> the aromatic imines,<sup>2</sup> and the aliphatic imine derivatives<sup>3</sup> were prepared according to literature procedures. Silyl dienol ether compounds were prepared according to literature procedures; the recorded characterization data matched the literature.<sup>4</sup>



## Characterization Data of the Substrates

### N-Tosyl Imines

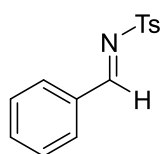

**(E)-N-Benzylidene-4-methylbenzenesulfonamide (8).**  $^1\text{H}$  NMR (400 MHz,  $\text{CDCl}_3$ )  $\delta$  9.03 (s, 1H), 7.97 – 7.85 (m, 4H), 7.66 – 7.57 (m, 1H), 7.54 – 7.45 (m, 2H), 7.39 – 7.31 (m, 2H), 2.44 (s, 3H);  $^{13}\text{C}$  NMR (101 MHz,  $\text{CDCl}_3$ )  $\delta$  170.3, 144.8, 135.3, 135.1, 132.6, 131.5, 130.0, 129.3, 128.3, 21.8. Matches known data.<sup>6</sup>

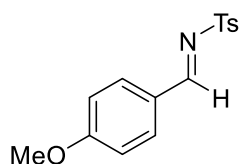

**(E)-N-(4-methoxybenzylidene)-4-methylbenzenesulfonamide (S1).**  $^1\text{H}$  NMR (400 MHz,  $\text{CDCl}_3$ )  $\delta$  8.94 (s, 1H), 7.92 – 7.85 (m, 4H), 7.36 – 7.31 (m, 2H), 7.01 – 6.93 (m, 2H), 3.88 (s, 3H), 2.43 (s, 3H);  $^{13}\text{C}$  NMR (101 MHz,  $\text{CDCl}_3$ )  $\delta$  169.3, 165.4, 144.4, 135.9, 133.9, 129.9, 128.1, 125.4, 114.8, 55.8, 21.8. Matches known data.<sup>6</sup>

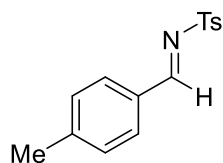

**(E)-4-Methyl-N-(4-methylbenzylidene)benzenesulfonamide (S2).**  $^1\text{H}$  NMR (400 MHz,  $\text{CDCl}_3$ )  $\delta$  8.99 (s, 1H), 7.91 – 7.85 (m, 2H), 7.84 – 7.79 (m, 2H), 7.39 – 7.32 (m, 2H), 7.30 – 7.27 (m, 2H), 2.44 (s, 3H), 2.43 (s, 3H);  $^{13}\text{C}$  NMR (101 MHz,  $\text{CDCl}_3$ )  $\delta$  170.1, 146.5, 144.6, 135.5, 131.6, 130.1, 129.9, 128.2, 126.6, 22.1, 21.8. Matches known data.<sup>7</sup>

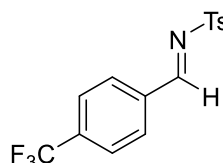

**(E)-4-Methyl-N-(4-(trifluoromethyl)benzylidene)benzenesulfonamide (S3).**  $^1\text{H}$  NMR (400 MHz,  $\text{CDCl}_3$ )  $\delta$  9.07 (s, 1H), 8.08 – 8.01 (m, 2H), 7.94 – 7.86 (m, 2H), 7.75 (d,  $J = 8.1$  Hz, 2H), 7.40 – 7.35 (m, 2H), 2.45 (s, 3H);  $^{13}\text{C}$  NMR (101 MHz,  $\text{CDCl}_3$ )  $\delta$  168.6, 145.2, 135.9 (q,  $^2J_{\text{CF}} = 32.8$  Hz), 135.5, 134.6, 131.5, 129.8, 128.4, 126.2 (q,  $^3J_{\text{CF}} = 3.8$  Hz), 123.4 (q,  $^1J_{\text{CF}} = 272.8$  Hz), 21.8;  $^{19}\text{F}$  NMR (282 MHz,  $\text{CDCl}_3$ )  $\delta$  -63.3. Matches known data.<sup>8</sup>

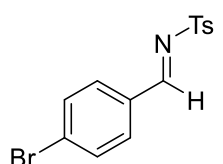

**(E)-N-(4-Bromobenzylidene)-4-methylbenzenesulfonamide (S4).**  $^1\text{H}$  NMR (400 MHz,  $\text{CDCl}_3$ )  $\delta$  8.98 (s, 1H), 7.92 – 7.84 (m, 2H), 7.82 – 7.74 (m, 2H), 7.67 – 7.60 (m, 2H), 7.39 – 7.31 (m, 2H), 2.44 (s, 3H);  $^{13}\text{C}$  NMR (101 MHz,  $\text{CDCl}_3$ )  $\delta$  168.9, 145.0, 135.0, 132.8, 132.5, 131.4, 130.4, 130.0, 128.3, 21.8. Matches known data.<sup>6</sup>

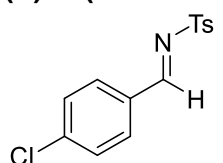

**(E)-N-(4-Chlorobenzylidene)-4-methylbenzenesulfonamide (S5).**  $^1\text{H}$  NMR (400 MHz,  $\text{CDCl}_3$ )  $\delta$  8.99 (s, 1H), 7.94 – 7.80 (m, 4H), 7.51 – 7.43 (m, 2H), 7.39 – 7.31 (m, 2H), 2.44 (s, 3H);  $^{13}\text{C}$  NMR (101 MHz,  $\text{CDCl}_3$ )  $\delta$  168.8, 144.9, 141.6, 135.1, 132.5, 131.0, 130.0, 129.8, 128.3, 21.8. Matches known data.<sup>6</sup>

**(E)-4-methyl-N-(4-(4,4,5,5-tetramethyl-1,3,2-dioxaborolan-2-yl)benzylidene)benzenesulfonamide (S6).**

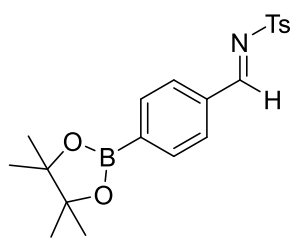

<sup>1</sup>H NMR (400 MHz, CDCl<sub>3</sub>) δ 9.03 (s, 1H), 7.92 – 7.87 (m, 6H), 7.37 – 7.33 (m, 2H), 2.44 (s, 3H), 1.35 (s, 12H); <sup>13</sup>C NMR (101 MHz, CDCl<sub>3</sub>) δ 170.3, 144.8, 135.4, 134.5, 130.4, 130.0, 129.9, 128.3, 126.6, 84.5, 25.0, 21.8; IR (ATR):  $\tilde{\nu}$  = 2977, 1597, 1549, 1512, 1389, 1352, 1317, 1303, 1271, 1221, 1157, 1085, 1017, 964, 903, 868, 811, 784, 679; HRMS (ESI<sup>+</sup>, *m/z*) calculated for [C<sub>20</sub>H<sub>24</sub>NO<sub>4</sub>SB+Na]<sup>+</sup> ([M+Na]<sup>+</sup>) 408.1411, found 408.1414.

**(E)-4-Methyl-N-(naphthalen-2-ylmethylene)benzenesulfonamide (S7).**

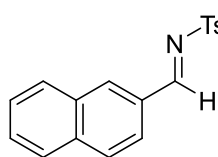

<sup>1</sup>H NMR (400 MHz, CDCl<sub>3</sub>) δ 9.18 (s, 1H), 8.37 – 8.32 (m, 1H), 8.04 (dd, *J* = 8.6, 1.7 Hz, 1H), 7.99 – 7.85 (m, 5H), 7.64 (ddd, *J* = 8.2, 6.9, 1.4 Hz, 1H), 7.58 (ddd, *J* = 8.1, 6.9, 1.3 Hz, 1H), 7.40 – 7.32 (m, 2H), 2.45 (s, 3H); <sup>13</sup>C NMR (101 MHz, CDCl<sub>3</sub>) δ 170.2, 144.7, 136.7, 136.3, 135.4, 132.8, 130.3, 130.0, 129.7, 129.6, 129.3, 128.3, 128.2, 127.4, 124.3, 21.8. Matches known data.<sup>8</sup>

**(E)-4-Methyl-N-(2-methylbenzylidene)benzenesulfonamide (S8).**

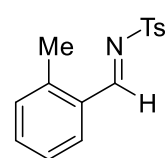

<sup>1</sup>H NMR (400 MHz, CDCl<sub>3</sub>) δ 9.35 (s, 1H), 8.01 (dd, *J* = 7.8, 1.5 Hz, 1H), 7.93 – 7.86 (m, 2H), 7.47 (app. td, *J* = 7.5, 1.5 Hz, 1H), 7.37 – 7.32 (m, 2H), 7.29 – 7.27 (m, 2H), 2.61 (s, 3H), 2.44 (s, 3H); <sup>13</sup>C NMR (101 MHz, CDCl<sub>3</sub>) δ 168.8, 144.6, 142.4, 135.6, 134.7, 131.7, 130.8, 129.9, 129.9, 128.2, 126.8, 21.8, 19.8. Matches known data.<sup>8</sup>

**(E)-N-(Furan-2-ylmethylene)-4-methylbenzenesulfonamide (S9).**

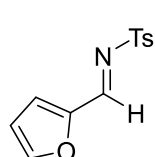

<sup>1</sup>H NMR (400 MHz, CDCl<sub>3</sub>) δ 8.82 (d, *J* = 0.5 Hz, 1H), 7.90 – 7.85 (m, 2H), 7.74 (app. dt, *J* = 1.3, 0.6 Hz, 1H), 7.34 (dd, *J* = 1.9, 0.8 Hz, 1H), 7.33 – 7.32 (m, 2H), 6.65 (dd, *J* = 3.6, 1.7 Hz, 1H), 2.43 (s, 3H); <sup>13</sup>C NMR (101 MHz, CDCl<sub>3</sub>) δ 155.8, 149.9, 149.3, 144.7, 135.4, 129.9, 128.2, 124.7, 113.8, 21.8. Matches known data.<sup>7</sup>

**(E)-4-Methyl-N-(thiophen-2-ylmethylene)benzenesulfonamide (S10).**

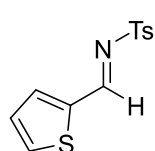

<sup>1</sup>H NMR (400 MHz, CDCl<sub>3</sub>) δ 9.11 (d, *J* = 0.7 Hz, 1H), 7.91 – 7.83 (m, 2H), 7.81 – 7.74 (m, 2H), 7.38 – 7.29 (m, 2H), 7.24 – 7.17 (m, 1H), 2.44 (s, 3H); <sup>13</sup>C NMR (101 MHz, CDCl<sub>3</sub>) δ 162.3, 144.6, 139.1, 138.3, 136.8, 135.6, 129.9, 129.0, 128.1, 21.8. Matches known data.<sup>6</sup>

**(E)-4-Methyl-N-(3-phenylpropylidene)benzenesulfonamide (S11).**

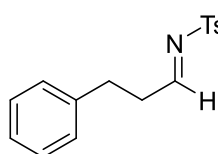

<sup>1</sup>H NMR (400 MHz, CDCl<sub>3</sub>) δ 8.63 (t, *J* = 4.1 Hz, 1H), 7.79 – 7.74 (m, 2H), 7.37 – 7.30 (m, 2H), 7.29 – 7.20 (m, 2H), 7.21 – 7.16 (m, 1H), 7.15 – 7.11 (m, 2H), 3.01 – 2.91 (m, 2H), 2.89 – 2.81 (m, 2H), 2.45 (s, 3H); <sup>13</sup>C NMR (101 MHz, CDCl<sub>3</sub>) δ

177.5, 144.9, 139.7, 134.6, 129.9, 128.8, 128.5, 128.3, 126.6, 37.5, 30.8, 21.8. Matches known data.<sup>9</sup>

**(E)-4-Methyl-N-propylidenebenzenesulfonamide (S12).** <sup>1</sup>H NMR (400 MHz, CDCl<sub>3</sub>) δ 8.62

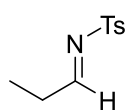

(t,  $J = 4.0$  Hz, 1H), 7.86 – 7.77 (m, 2H), 7.38 – 7.28 (m, 2H), 2.55 (qd,  $J = 7.3, 4.0$  Hz, 2H), 2.44 (s, 3H), 1.16 (t,  $J = 7.3$  Hz, 3H); <sup>13</sup>C NMR (101 MHz, CDCl<sub>3</sub>) δ 179.1, 144.8, 134.8, 129.9, 128.3, 29.6, 21.8, 8.8; IR (ATR):  $\tilde{\nu} = 2982, 2939, 2896, 1631, 1595, 1493, 1452, 1403, 1381, 1314, 1302, 1288, 1185, 1153, 1089, 1017, 900, 812, 800, 704, 669$ ; HRMS (ESI<sup>+</sup>,  $m/z$ ) calculated for [C<sub>10</sub>H<sub>13</sub>NO<sub>2</sub>S]<sup>+</sup> ([M+H]<sup>+</sup>) 212.0740, found 212.0742.

**(E)-N-Heptylidene-4-methylbenzenesulfonamide (S13).** <sup>1</sup>H NMR (400 MHz, CDCl<sub>3</sub>) δ 8.60

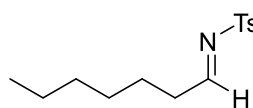

(t,  $J = 4.6$  Hz, 1H), 7.85 – 7.77 (m, 2H), 7.42 – 7.30 (m, 2H), 2.50 (td,  $J = 7.5, 4.6$  Hz, 2H), 2.44 (s, 3H), 1.66 – 1.57 (m, 2H), 1.37 – 1.24 (m, 6H), 0.90 – 0.80 (m, 3H); <sup>13</sup>C NMR (101 MHz, CDCl<sub>3</sub>) δ 178.7, 144.8, 134.9, 129.9, 128.3, 36.1, 31.5, 28.9, 24.8, 22.5, 21.8, 14.1; IR (ATR):  $\tilde{\nu} = 2955, 2927, 2858, 1626, 1597, 1456, 1402, 1321, 1291, 1157, 1091, 1019, 813, 741, 670$ ; HRMS (ESI<sup>+</sup>,  $m/z$ ) calculated for [C<sub>14</sub>H<sub>21</sub>NO<sub>2</sub>S]<sup>+</sup> ([M+H]<sup>+</sup>) 268.1366, found 268.1368.

**(E)-4-Methyl-N-(2-methylpropylidene)benzenesulfonamide (S14).** <sup>1</sup>H NMR (400 MHz,

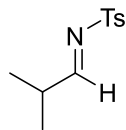

CDCl<sub>3</sub>) δ 8.51 (d,  $J = 4.2$  Hz, 1H), 7.85 – 7.76 (m, 2H), 7.38 – 7.28 (m, 2H), 2.69 (app. pd,  $J = 6.9, 4.2$  Hz, 1H), 2.44 (s, 3H), 1.16 (d,  $J = 6.9$  Hz, 6H); <sup>13</sup>C NMR (101 MHz, CDCl<sub>3</sub>) δ 182.0, 144.8, 134.9, 129.9, 128.3, 34.8, 21.8, 18.2. Matches known data.<sup>10</sup>

**(E)-N-(Cyclohexylmethylene)-4-methylbenzenesulfonamide (S15).** <sup>1</sup>H NMR (400 MHz,

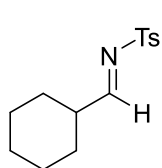

CDCl<sub>3</sub>) δ 8.48 (d,  $J = 4.4$  Hz, 1H), 7.84 – 7.77 (m, 2H), 7.37 – 7.29 (m, 2H), 2.44 (s, 3H), 2.43 – 2.38 (m, 1H), 1.91 – 1.80 (m, 2H), 1.79 – 1.72 (m, 2H), 1.70 – 1.64 (m, 1H), 1.38 – 1.16 (m, 5H); <sup>13</sup>C NMR (101 MHz, CDCl<sub>3</sub>) δ 181.2, 144.7, 135.0, 129.9, 128.2, 43.8, 28.5, 25.8, 25.2, 21.8. Matches known data.<sup>10</sup>

**(E)-N-(2,2-Dimethylpropylidene)-4-methylbenzenesulfonamide (S16).** <sup>1</sup>H NMR (400 MHz,

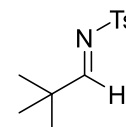

CDCl<sub>3</sub>) δ 8.44 (s, 1H), 7.85 – 7.78 (m, 2H), 7.37 – 7.32 (m, 2H), 2.44 (s, 3H), 1.14 (s, 9H); <sup>13</sup>C NMR (101 MHz, CDCl<sub>3</sub>) δ 184.0, 144.7, 135.0, 129.9, 128.2, 38.0, 26.0, 21.8. Matches known data.<sup>7</sup>

**(E)-4-Methyl-N-(3-methylbutylidene)benzenesulfonamide (27).** <sup>1</sup>H NMR (400 MHz, CDCl<sub>3</sub>)

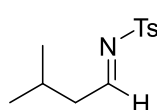

δ 8.59 (t,  $J = 5.1$  Hz, 1H), 7.86 – 7.75 (m, 2H), 7.38 – 7.28 (m, 2H), 2.44 (s, 3H), 2.39 (dd,  $J = 6.9, 5.1$  Hz, 2H), 2.07 (app. dp,  $J = 13.5, 6.7$  Hz, 1H), 0.96 (d,  $J = 6.6$  Hz, 6H); <sup>13</sup>C NMR (101 MHz, CDCl<sub>3</sub>) δ 178.3, 144.8, 134.9, 130.0, 128.2, 44.6, 26.1, 22.6, 21.8; IR (ATR):  $\tilde{\nu} = 2958, 2872, 1624, 1597, 1465, 1319, 1291, 1156, 1090$ ,

1019, 855, 814, 741, 670; HRMS (ESI<sup>+</sup>, *m/z*) calculated for [C<sub>12</sub>H<sub>17</sub>NO<sub>2</sub>S]<sup>+</sup> ([M+H]<sup>+</sup>) 240.1053, found 240.1052.

## Dienol Ethers

**(E)-(Buta-1,3-dien-1-yloxy)triisopropylsilane (1, R = TIPS).** <sup>1</sup>H NMR (400 MHz, C<sub>6</sub>D<sub>6</sub>) δ 6.64 (app. dq, *J* = 11.6, 0.6 Hz, 1H), 6.27 (dddd, *J* = 16.9, 10.9, 10.2, 0.6 Hz, 1H), 5.98 (app. ddt, *J* = 11.6, 10.8, 0.7 Hz, 1H), 5.04 (app. ddt, *J* = 16.9, 1.8, 0.8 Hz, 1H), 4.87 (app. ddt, *J* = 10.3, 1.8, 0.7 Hz, 1H), 1.03 (s, 21H); <sup>13</sup>C NMR (101 MHz, C<sub>6</sub>D<sub>6</sub>) δ 145.9, 133.8, 114.9, 112.0, 17.8, 12.2. Matches known data.<sup>4</sup>

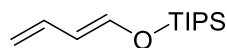

**(E)-1-(Methoxymethoxy)buta-1,3-diene (1, R = MOM).** Chloromethyl methyl ether (1.5 mL, 20 mmol) was added dropwise to a stirred solution of *cis*-2-butene-1,4-diol (0.82 mL, 10 mmol) and *N,N*-diisopropylethylamine (5.2 mL, 30 mmol) in dichloromethane (10 mL) at 0 °C. After stirring for 19 h at room temperature, aqueous HCl (1 M, 15 mL) was slowly added at 0 °C and the aqueous phase was extracted with diethyl ether (3 × 20 mL). The combined organic layers were washed with brine (20 mL), dried over Na<sub>2</sub>SO<sub>4</sub>, filtered and concentrated under reduced pressure to afford a colorless oil, which was used in the next step without purification.

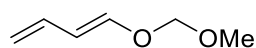

*n*-BuLi (1.6 M in hexanes, 12.5 mL, 20 mmol) was added dropwise to a stirred solution of *i*-Pr<sub>2</sub>NH (2.8 mL, 20 mmol) in degassed THF (40 mL) at 0 °C, and the resulting solution was stirred for 20 min. (*Z*)-2,4,9,11-Tetraoxadodec-6-ene (1.76 g, 10 mmol) was added dropwise to the resulting solution of lithium diisopropylamide at -78 °C. After stirring for 2 h at 0 °C, a saturated aqueous solution of NaHCO<sub>3</sub> (30 mL) was added and the aqueous phase was extracted with diethyl ether (3 × 50 mL). The combined organic layers were washed with brine (50 mL), dried over Na<sub>2</sub>SO<sub>4</sub>, filtered and concentrated under reduced pressure to afford pale yellow oil. The residue was purified by flash chromatography (SiO<sub>2</sub>; methyl *tert*-butyl ether/pentane, 1:20) to afford title compound as a colorless oil (554 mg, 49% yield). <sup>1</sup>H NMR (400 MHz, CDCl<sub>3</sub>) δ 6.54 (dd, *J* = 12.4, 0.7 Hz, 1H), 6.21 (dddd, *J* = 16.9, 10.8, 10.2, 0.6 Hz, 1H), 5.79 (app. ddt, *J* = 12.4, 10.9, 0.8 Hz, 1H), 5.04 (app. ddt, *J* = 16.9, 1.6, 0.7 Hz, 1H), 4.87 (app. ddt, *J* = 10.3, 1.5, 0.6 Hz, 1H), 4.85 (s, 2H), 3.41 (s, 3H); <sup>13</sup>C NMR (101 MHz, CDCl<sub>3</sub>) δ 148.1, 133.1, 113.1, 111.1, 96.0, 56.1; IR (ATR):  $\tilde{\nu}$  = 2957, 2899, 1656, 1642, 1466, 1443, 1420, 1403, 1305, 1250, 1219, 1191, 1153, 1137, 1105, 1052, 994, 973, 942, 914, 885, 837, 783, 659; HRMS (ESI<sup>+</sup>, *m/z*) calculated for [C<sub>6</sub>H<sub>11</sub>O<sub>2</sub>]<sup>+</sup> ([M+H]<sup>+</sup>) 115.0754, found 115.0753.

**(E)-((Buta-1,3-dien-1-yloxy)methyl)benzene (1, R = Bn).** Sodium hydride (0.96 g, 40 mmol)

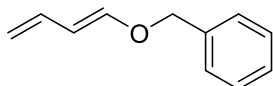

was suspended in anhydrous dimethyl sulfoxide (45 mL) and benzyl alcohol (2.6 mL, 25 mmol) was added dropwise to this mixture at room temperature. After stirring for 1 h at room temperature, *cis*-1,4-dichloro-2-butene (1.2 mL, 11 mmol) was added and stirring was continued at 50 °C overnight. The reaction was cooled to 0 °C, the mixture diluted with diethyl ether (20 mL) and saturated NH<sub>4</sub>Cl solution (60 mL). The aqueous phase was extracted with diethyl ether (3 × 50 mL). The combined organic layers were washed with distilled water (50 mL), dried over Na<sub>2</sub>SO<sub>4</sub>, filtered and concentrated under reduced pressure to afford a brown oil. The residue was purified by flash chromatography (SiO<sub>2</sub>; diethyl ether/pentane, 2:98) to afford the title compound as a yellow liquid as a mixture of diastereomers (1.5 g, 84%; *E:Z* = 7:1). <sup>1</sup>H NMR (400 MHz, CDCl<sub>3</sub>) δ 7.44 – 7.37 (m, 5H), 6.72 (d, *J* = 12.5 Hz, 1H), 6.35 – 6.21 (m, 1H), 5.79 – 5.72 (m, 1H), 5.12 – 5.05 (m, 1H), 4.93 – 4.88 (m, 1H), 4.86 (s, 2H); <sup>13</sup>C NMR (101 MHz, CDCl<sub>3</sub>) δ 150.7, 136.7, 133.4, 128.7, 128.2, 127.7, 112.1, 108.2, 71.8. Matches known data.<sup>11</sup>

## Ni-catalyzed Reductive Coupling of Dienol Ethers and Imines

### Representative Procedure A

#### 4-Methyl-*N*-((1*S*,2*S*)-1-phenyl-2-((triisopropylsilyl)oxy)-pent-4-en-1-yl)benzenesulfon-

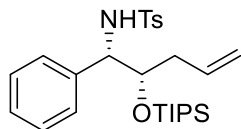

**amide (9c).** A flame-dried Schlenk flask was charged under argon with bis(cyclooctadiene)nickel(0) (8.0 mg, 0.029 mmol, 10 mol%), phosphoramidite **L1** (19 mg, 0.029 mmol, 10 mol%) and THF (0.60 mL).

Dienol ether **1** (R = TIPS) (0.23 mL, 0.87 mmol) and triethylborane (1.0 M in THF, 0.44 mL, 0.44 mmol) were added. *N*-Tosyl imine **8** (75 mg, 0.29 mmol) and distilled and degassed water (16  $\mu$ L, 0.87 mmol, 3.0 equiv) were introduced, the flask was sealed under argon, and the mixture was stirred at room temperature overnight. The reaction was quenched with sat. NaHCO<sub>3</sub> solution (3.0 mL) and stirring was continued for 10 min. The mixture was diluted with methyl *tert*-butyl ether (3.0 mL) and the aqueous layer was extracted with methyl *tert*-butyl ether (3  $\times$  5 mL). The combined organic layers were dried over anhydrous Na<sub>2</sub>SO<sub>4</sub>, filtered and concentrated under reduced pressure to give a pale yellow oil. Purification by flash chromatography (SiO<sub>2</sub>; hexane/methyl *tert*-butyl ether, 100:1 to 20:1) afforded the title compound as a white solid (132 mg, 93%, >20:1 dr, 90% ee).  $[\alpha]_D^{20} = +44.6$  ( $c = 0.5$ , CHCl<sub>3</sub>); <sup>1</sup>H NMR (400 MHz, CDCl<sub>3</sub>)  $\delta$  7.56 – 7.50 (m, 2H), 7.14 – 7.06 (m, 5H), 7.05 – 7.00 (m, 2H), 5.73 (ddt,  $J = 17.3, 10.3, 7.1$  Hz, 1H), 5.41 (d,  $J = 7.7$  Hz, 1H), 5.13 (dd,  $J = 10.3, 1.9$  Hz, 1H), 5.03 (app. dq,  $J = 17.1, 1.5$  Hz, 1H), 4.49 (dd,  $J = 7.7, 2.5$  Hz, 1H), 3.92 (dt,  $J = 9.5, 3.0$  Hz, 1H), 2.49 – 2.39 (m, 1H), 2.33 (s, 3H), 2.22 (dddd,  $J = 11.6, 6.8, 3.4, 1.7$  Hz, 1H), 0.96 – 0.87 (m, 21H); <sup>13</sup>C NMR (101 MHz, CDCl<sub>3</sub>)  $\delta$  142.9, 139.6, 138.2, 133.2, 129.3, 128.0, 127.18, 127.16, 127.1, 119.2, 77.4, 58.8, 39.0, 21.5, 18.2, 18.0, 12.8; IR (ATR):  $\tilde{\nu} = 3313, 2938, 2889, 2863, 1600, 1497, 1455, 1395, 1327, 1261, 1159, 1088, 1064, 1015, 997, 953, 885, 849, 813, 765, 750$ ; HRMS (ESI<sup>+</sup>,  $m/z$ ) calculated for [C<sub>27</sub>H<sub>41</sub>NO<sub>3</sub>SSi+Na]<sup>+</sup> ([M+Na]<sup>+</sup>) 510.2469, found 510.2472.

Note: Two methyl groups of isopropyl substituents of the TIPS ether are split in <sup>13</sup>C NMR spectrum.

When the reaction was carried out on larger scale (259 mg of **8**, 1 mmol), product **9c** was obtained in 91% yield (444 mg, dr >20:1, 90% ee)

The ee was determined by 2D HPLC analysis. Step 1: Purification: 50 mm Zorbax Eclipse Plus C18,  $\varnothing$  4.6 mm i. D., methanol/water = 90:10,  $v = 1.0$  mL/min,  $\lambda = 220$  nm,  $t(\text{major}) = 2.90$  min, 308 K.

### 'D chromatogram(s)

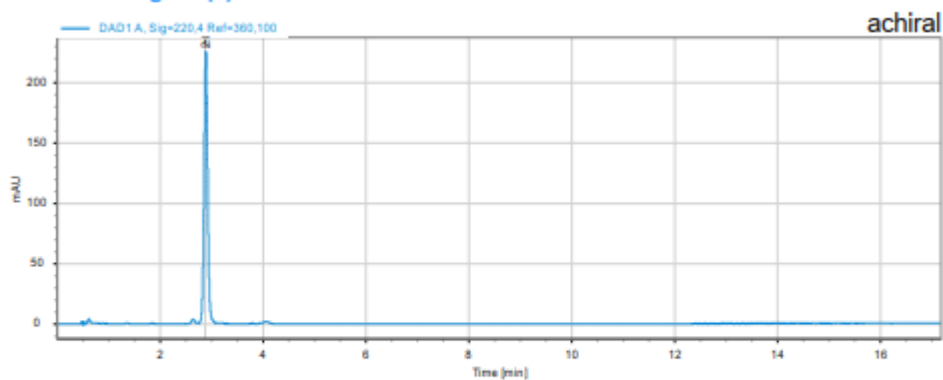

### Sampling table ('D)

| Cut group | Cut # | 'D Cut start [min] | 'D Ret. time [min] | 'D Duration [min] | Trigger | 'D Run start [min] |
|-----------|-------|--------------------|--------------------|-------------------|---------|--------------------|
|           | 1     | 2.87               | 2.897              | 0.04              | Peak    | 2.91 product       |

Separation of impurities on an achiral column

Step 2: Chiral resolution of the major diastereomer: Daicel 150 mm Chiralcel OZ-3R,  $\varnothing$  4.6 mm i. d., acetonitrile/water = 75:25,  $v = 1.0$  mL/min,  $\lambda = 220$  nm,  $t(\text{major}) = 9.31$  min,  $t(\text{minor}) = 10.64$  min.

### Cut# : 1

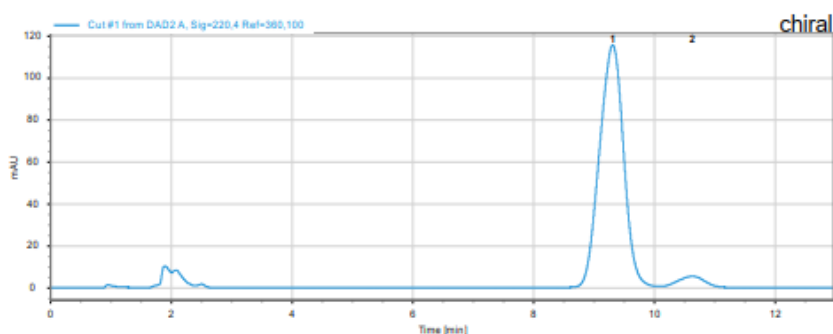

Signal: DAD2 A, Sig=220,4 Ref=360,100

| Compound | Cut | Ret.Time | Area                        | Width | Height  | Symmetry |                |
|----------|-----|----------|-----------------------------|-------|---------|----------|----------------|
| 1        | 1   | 9.313    | 3207.776<br><b>3207.776</b> | 0.395 | 115.498 | 1.143    | 1st enantiomer |
| 2        | 1   | 10.636   | 168.670<br><b>168.670</b>   | 0.369 | 5.341   | 1.209    | 2nd enantiomer |

ee = 90.0 %

### Component table

Signal: DAD2 A, Sig=220,4 Ref=360,100

| Component | 'D Sampling range [min] | Ret.Time 'D [min] | Area     | Area%  |
|-----------|-------------------------|-------------------|----------|--------|
| 1         | 2.87 - 2.91             | 9.313             | 3207.776 | 95.005 |
| 2         | 2.87 - 2.91             | 10.636            | 168.670  | 4.995  |

Determination of the ee of compound **9c**

Cut# : 1

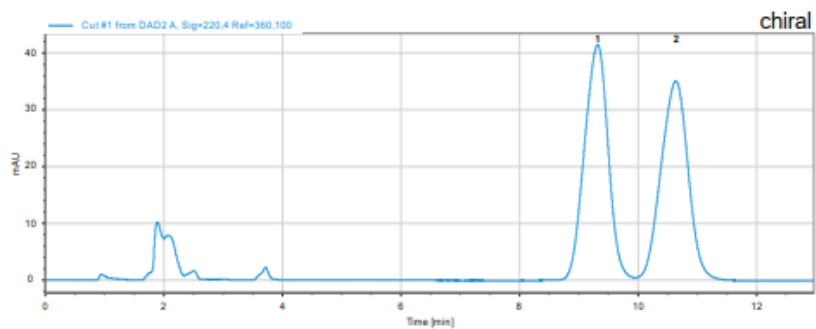

Signal: DAD2 A, Sig=220,4 Ref=360,100

| Compound | Cut | Ret.Time | Area                 | Width | Height | Symmetry |                |
|----------|-----|----------|----------------------|-------|--------|----------|----------------|
| 1        | 1   | 9.321    | 1153.121<br>1153.121 | 0.329 | 41.469 | 1.151    | 1st enantiomer |
| 2        | 1   | 10.647   | 1116.394<br>1116.394 | 0.377 | 35.092 | 1.190    | 2nd enantiomer |

### Component table

Signal: DAD2 A, Sig=220,4 Ref=360,100

| Component | <sup>1</sup> D Sampling range [min] | Ret.Time <sup>2</sup> D [min] | Area     | Area%  |
|-----------|-------------------------------------|-------------------------------|----------|--------|
| 1         | 2.88 - 2.92                         | 9.321                         | 1153.121 | 50.809 |
| 2         | 2.88 - 2.92                         | 10.647                        | 1116.394 | 49.191 |

Separation of the enantiomers of *rac*-**9c**



## Notes:

1. Ni(cod)<sub>2</sub> was purchased from Strem Chemicals and transferred into a flame-dried Schlenk flask under argon immediately after opening. The complex was stored in a freezer at –20 °C under an over-pressure of argon. The color should be bright yellow. When taken out of the freezer, the Schlenk flask was allowed to warm to room temperature under Ar before weighing the solid out directly into the reaction flask using “Argon pants” as shown in Figure S3 below. Under these conditions, the Ni(cod)<sub>2</sub> sample can be used numerous times for over a year without any sign of decomposition.
2. Solid imines were used after recrystallization, liquid imines were used without purification after checking their purity by <sup>1</sup>H NMR spectroscopy. These compounds were stored in the freezer in a vial or round-bottom flask under air (–20 °C).
3. All dienol ether used in this study are liquids that were stored in the freezer (–20 °C) under argon in a crimp-capped vial. These compounds are stable for extended periods of time when stored at –20 °C.
4. Triethylborane (1.0 M in THF) was stored in the freezer at –20 °C under argon. Although triethylborane itself is highly pyrophoric and any solution of it must be handled with great care under oxygen-free conditions, no issues whatsoever were encountered when transferring the THF solutions using syringe techniques.
5. Ni(cod)<sub>2</sub> is relatively stable in the solid state but extremely O<sub>2</sub>-sensitive in solution. Therefore the ligand should always be added **before** the solvent, because it coordinates to the Ni(0) species and helps to stabilize the catalyst in case traces of inadvertent oxygen are present in solution. The dienol ether also seems to help stabilize the nickel species, while triethylborane will react with any excess oxygen. These two components should therefore be added immediately after the solvent to minimize potential catalyst decomposition.
6. The reactions were carried out in a sealed Schlenk flask rather than under a flow of argon due to the volatility of triethylborane (bp 95 °C). However, ethylene gas is generated by reduction of the nickel catalyst with triethylborane and given off over time; care must therefore be taken to use reaction vessels that withstand the increase in pressure caused by the gas evolution, especially upon scale-up.
7. In all cases investigated herein, the racemic samples needed for accurate ee determination were prepared analogously using a racemic sample of ligand **L1**
8. In most cases, the minor diastereomer could not be detected by <sup>1</sup>H NMR spectroscopy but it was usually observed by HPLC in a ≈1:50 ratio relative to the major diastereomer. In all such cases, the dr is noted as >20:1.
9. In many cases, 2D HPLC analysis was employed for accurate ee determination. To this end, the product was first purified on an achiral column to separate the

diastereomers, followed by separation of the enantiomers of the major diastereomer on a column with a chiral stationary phase.

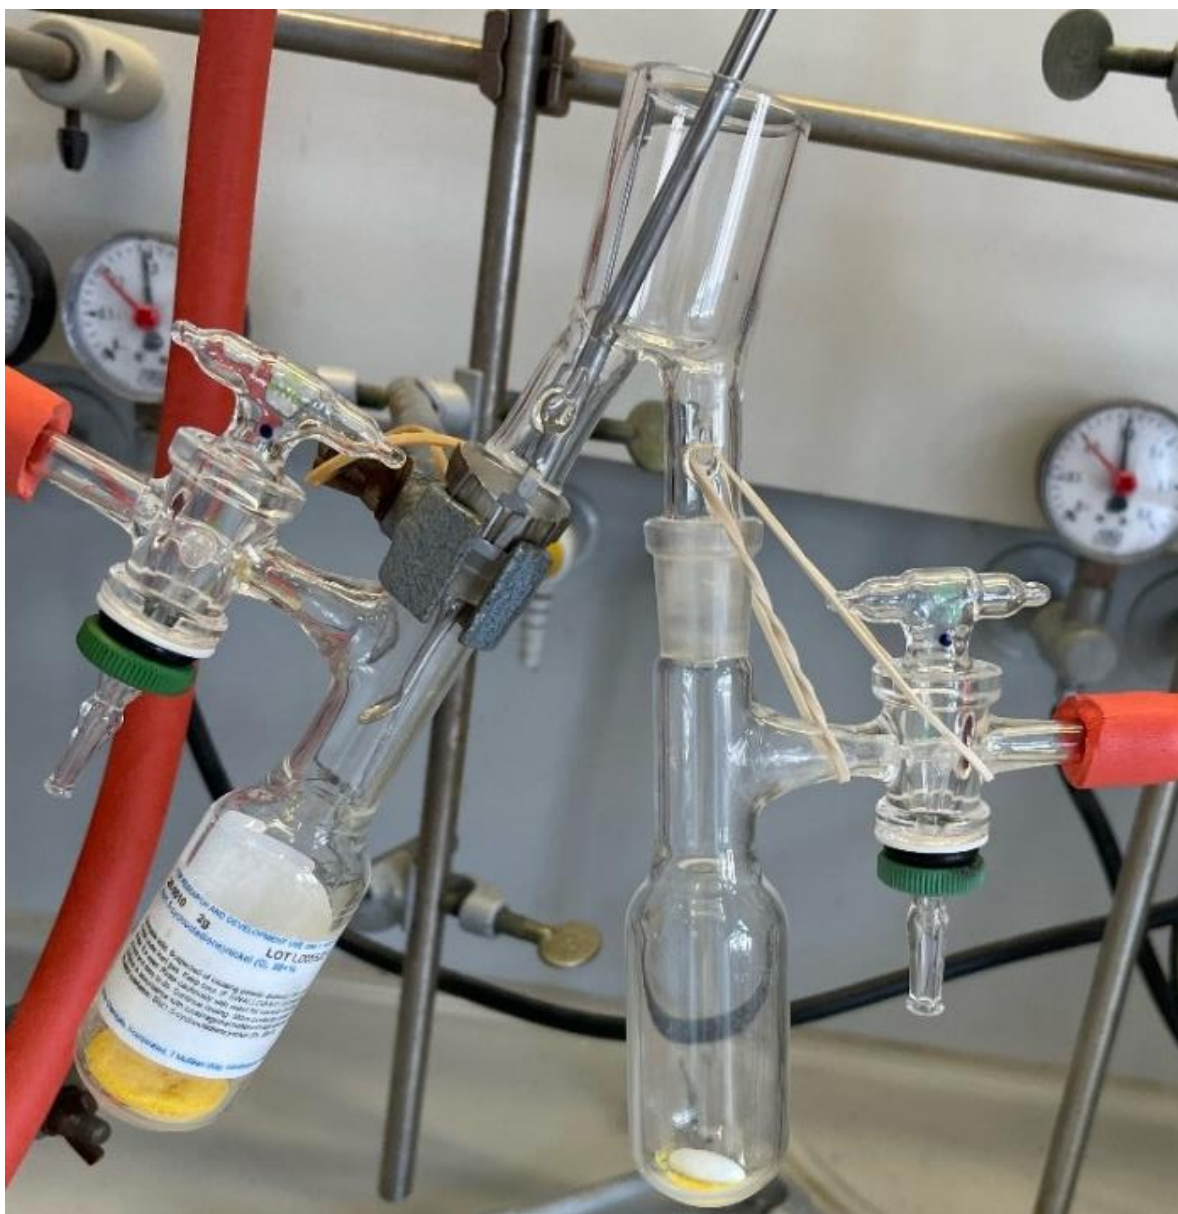

**Figure S3.** Use of “argon pants” for the transfer of air-sensitive compounds such as  $\text{Ni}(\text{cod})_2$ . The reaction and reagent flasks are connected *via* a glassware with two legs and an open top. Argon is run through both Schlenk flasks continuously to ensure an inert atmosphere. This technique allows weighing of air-sensitive compounds without use of a glovebox.

## ***N*-((1*S*,2*S*)-2-(Methoxymethoxy)-1-phenylpent-4-en-1-yl)-4-methylbenzenesulfonamide**

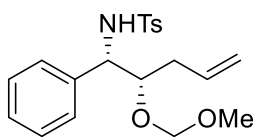

**(9d)**. Prepared according to the representative procedure **A**. Purified by flash chromatography (SiO<sub>2</sub>; hexane/ethyl acetate, 25:1 to 5:1) to give the title compound as a colorless oil (95 mg, 87%, >20:1 dr, 90% ee).

$[\alpha]_D^{20} = +33.9$  ( $c = 0.59$ , CHCl<sub>3</sub>); <sup>1</sup>H NMR (400 MHz, CDCl<sub>3</sub>)  $\delta$  7.49 – 7.45 (m, 2H), 7.17 – 7.08 (m, 3H), 7.08 – 7.02 (m, 4H), 5.73 (ddt,  $J = 17.3, 10.2, 7.1$  Hz, 1H), 5.63 (d,  $J = 6.6$  Hz, 1H), 5.09 (ddt,  $J = 10.3, 2.1, 1.1$  Hz, 1H), 5.02 (app. dq,  $J = 17.1, 1.5$  Hz, 1H), 4.53 (d,  $J = 6.9$  Hz, 1H), 4.44 (dd,  $J = 6.7, 4.6$  Hz, 1H), 4.34 (d,  $J = 6.9$  Hz, 1H), 3.65 (ddd,  $J = 6.8, 5.9, 4.6$  Hz, 1H), 3.18 (s, 3H), 2.32 (s, 3H), 2.29 – 2.15 (m, 2H); <sup>13</sup>C NMR (101 MHz, CDCl<sub>3</sub>)  $\delta$  142.9, 138.9, 138.0, 133.4, 129.2, 128.3, 127.5, 127.3, 127.2, 118.9, 96.6, 81.5, 59.6, 56.0, 36.3, 21.5; IR (ATR):  $\tilde{\nu} = 3236, 3064, 3030, 2975, 2897, 1641, 1599, 1495, 1455, 1433, 1328, 1288, 1212, 1151, 1089, 1025, 964, 922, 907, 864, 847, 812, 756, 734, 699, 691, 661$ ; HRMS (ESI<sup>+</sup>,  $m/z$ ) calculated for [C<sub>20</sub>H<sub>25</sub>O<sub>4</sub>S+Na]<sup>+</sup> ([M+Na]<sup>+</sup>) 398.1397, found 398.1396.

The ee was determined by 2D HPLC analysis. Step 1: Purification: 50 mm Zorbax Eclipse Plus C18,  $\varnothing$  4.6 mm i. d., methanol/water gradient 55% to 70% over 10 min and 95% over 1 min,  $v = 1.0$  mL/min,  $\lambda = 220$  nm,  $t(\text{major}) = 7.16$  min, 308 K.

### **<sup>1</sup>D chromatogram(s)**

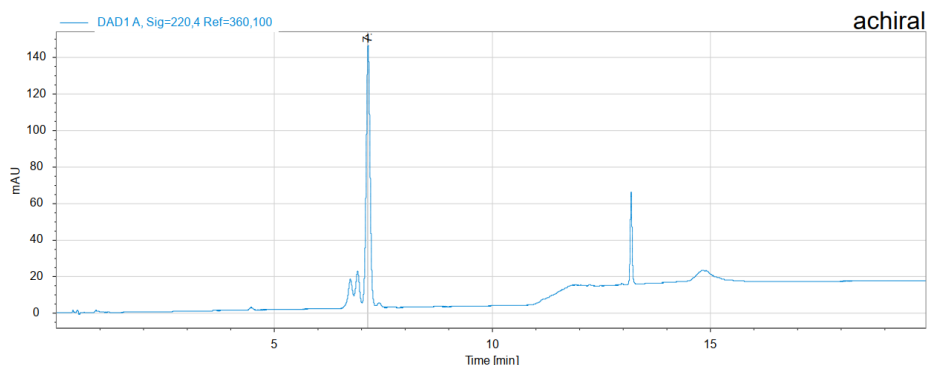

### **Sampling table (<sup>1</sup>D)**

| Cut group | Cut # | <sup>1</sup> D Cut start [min] | <sup>1</sup> D Ret. time [min] | <sup>1</sup> D Duration [min] | Trigger | <sup>1</sup> D Run start [min] |
|-----------|-------|--------------------------------|--------------------------------|-------------------------------|---------|--------------------------------|
|           | 1     | 7.13                           | 7.160                          | 0.04                          | Peak    | 7.17 desired product           |

Separation of impurities on an achiral column

Step 2: Chiral resolution of the major diastereomer: Daicel 150 mm Chiralpak IC-3,  $\varnothing$  4.6 mm i. d., acetonitrile/water = 50:50,  $v = 1.0$  mL/min,  $\lambda = 220$  nm,  $t(\text{minor}) = 7.03$  min,  $t(\text{major}) = 7.63$  min.

Cut# : 1

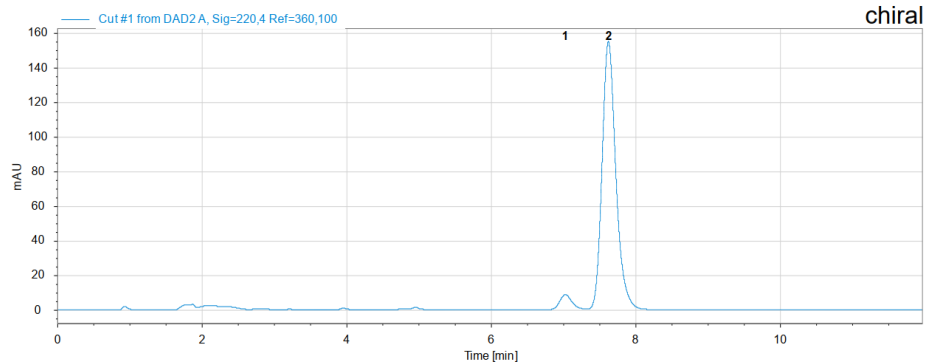

Signal: DAD2 A, Sig=220,4 Ref=360,100

| Compound | Cut | Ret.Time | Area                 | Width | Height  | Symmetry |                |
|----------|-----|----------|----------------------|-------|---------|----------|----------------|
| 1        | 1   | 7.029    | 103.392<br>103.392   | 0.149 | 8.686   | 0.820    | 1st enantiomer |
| 2        | 1   | 7.626    | 2048.981<br>2048.981 | 0.200 | 154.952 | 0.795    | 2nd enantiomer |

**ee = 90.4 %**

Determination of the ee of **9d**

Cut# : 1

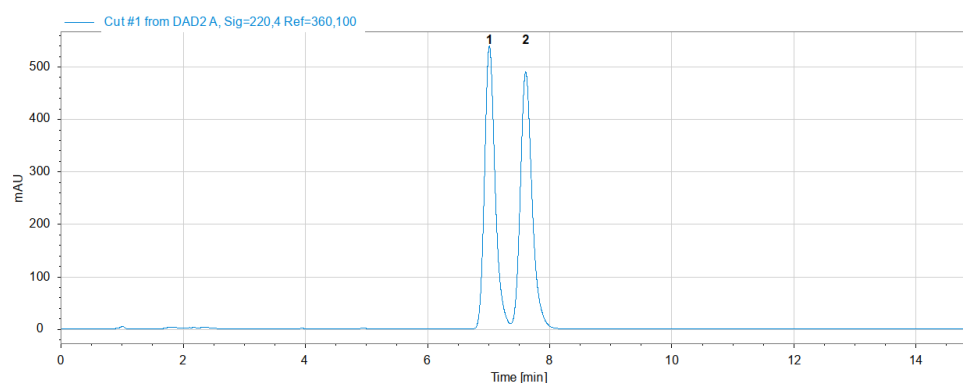

Signal: DAD2 A, Sig=220,4 Ref=360,100

| Compound | Cut | Ret.Time | Area                 | Width | Height  | Symmetry |
|----------|-----|----------|----------------------|-------|---------|----------|
| 1        | 1   | 7.020    | 6520.659<br>6520.659 | 0.184 | 540.382 | 0.776    |
| 2        | 1   | 7.614    | 6569.238<br>6569.238 | 0.203 | 490.607 | 0.778    |

Component table

Signal: DAD2 A, Sig=220,4 Ref=360,100

chiral

| Component | <sup>1</sup> D Sampling range [min] | Ret.Time <sup>2</sup> D [min] | Area     | Area%  |                |
|-----------|-------------------------------------|-------------------------------|----------|--------|----------------|
| 1         | 7.16 - 7.20                         | 7.020                         | 6520.659 | 49.814 | 1st enantiomer |
| 2         | 7.16 - 7.20                         | 7.614                         | 6569.238 | 50.186 | 2nd enantiomer |

Separation of the enantiomers of *rac*-**9d**

**4-Methyl-*N*-((1*S*,2*S*)-1-(*p*-tolyl)-2-((triisopropylsilyl)oxy)pent-4-en-1-yl)benzenesulfonamide (13a).** Prepared according to the representative procedure **A**. Purified by flash

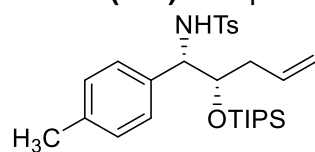

chromatography (SiO<sub>2</sub>; hexane/methyl *tert*-butyl ether, 100:1 to 25:1) to give the title compound as a white solid (141 mg, 97%,

>20:1 dr, 89% ee).  $[\alpha]_D^{20} = +58.6$  ( $c = 0.64$ , CHCl<sub>3</sub>); <sup>1</sup>H NMR (400

MHz, CDCl<sub>3</sub>) δ 7.54 – 7.48 (m, 2H), 7.11 – 7.07 (m, 2H), 6.92 (app. s, 4H), 5.71 (ddt,  $J = 17.4$ , 10.3, 7.1 Hz, 1H), 5.38 (d,  $J = 7.4$  Hz, 1H), 5.10 (ddt,  $J = 10.4$ , 2.0, 1.0 Hz, 1H), 5.00 (app. dq,  $J = 17.1$ , 1.5 Hz, 1H), 4.41 (dd,  $J = 7.3$ , 3.0 Hz, 1H), 3.91 (dt,  $J = 9.4$ , 3.2 Hz, 1H), 2.45 – 2.37 (m, 1H), 2.34 (s, 3H), 2.25 (s, 3H), 2.19 (dddd,  $J = 12.6$ , 7.0, 3.2, 1.5 Hz, 1H), 0.96 – 0.88 (m, 21H); <sup>13</sup>C NMR (101 MHz, CDCl<sub>3</sub>) δ 142.9, 138.1, 136.8, 136.5, 133.3, 129.3, 128.7, 127.2, 127.1, 119.0, 77.2, 58.8, 38.9, 21.5, 21.1, 18.2, 18.1, 12.8; IR (ATR):  $\tilde{\nu} = 3288$ , 2944, 2865, 1599, 1516, 1463, 1422, 1404, 1327, 1159, 1094, 1066, 1015, 995, 921, 881, 804, 755; HRMS (ESI<sup>+</sup>,  $m/z$ ) calculated for [C<sub>28</sub>H<sub>43</sub>NO<sub>3</sub>SSi+Na]<sup>+</sup> ([M+Na]<sup>+</sup>) 524.2625, found 524.2630.

The ee was determined by HPLC analysis: Chiralpak 150 mm IC-3, Ø 4.6 mm i. d., *n*-heptane/ethanol = 98:2,  $v = 1.0$  mL/min,  $\lambda = 220$  nm,  $t(\text{minor}) = 7.08$  min,  $t(\text{major}) = 7.99$  min.

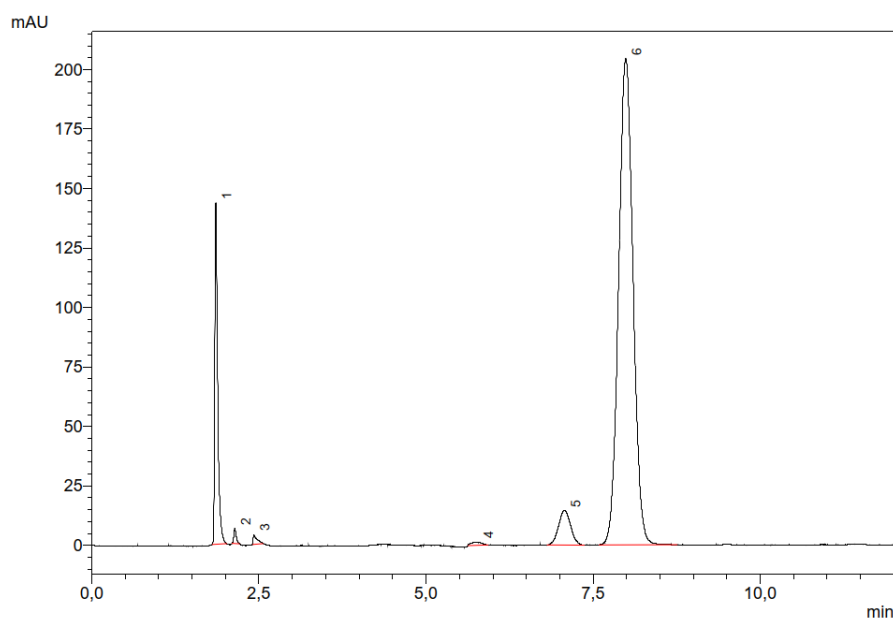

1 220nm,4nm

| Peak # | Ret. Time | Area % | Name                    |
|--------|-----------|--------|-------------------------|
| 1      | 1,86      | 11,41  |                         |
| 2      | 2,14      | 0,45   |                         |
| 3      | 2,42      | 0,44   |                         |
| 4      | 5,77      | 0,39   |                         |
| 5      | 7,08      | 4,91   | 1. Enantiomer           |
| 6      | 7,99      | 82,40  | 2. Enantiomer 88.7 % ee |
| Total  |           | 100,00 |                         |

**Determination of the ee of 13a**

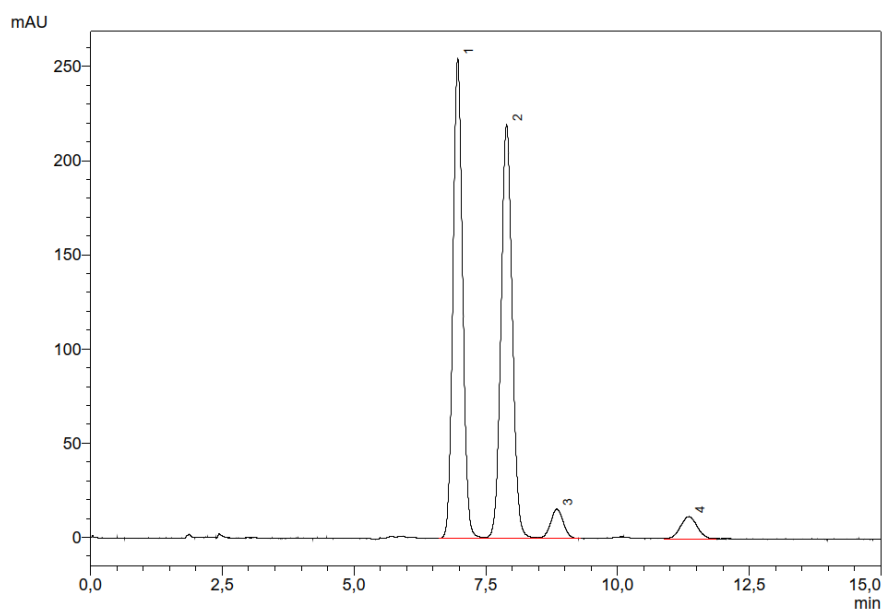

1 220nm,4nm

| Peak # | Ret. Time | Area % | Name          |
|--------|-----------|--------|---------------|
| 1      | 6,97      | 46,12  | 1. Enantiomer |
| 2      | 7,90      | 46,50  | 2. Enantiomer |
| 3      | 8,85      | 3,66   |               |
| 4      | 11,36     | 3,72   |               |
| Total  |           | 100,00 |               |

### Separation of enantiomers of *rac*-13a

***N*-((1*S*,2*S*)-1-(4-Methoxyphenyl)-2-((triisopropylsilyloxy)pent-4-en-1-yl)-4-methyl-**

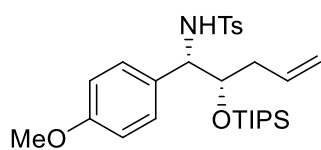

**benzenesulfonamide (13b).** Prepared according to the

representative procedure **A** but at 0 °C. Purified by flash chromatography (SiO<sub>2</sub>; hexane/methyl *tert*-butyl ether, 100:1 to 20:1) to give the title compound as a white solid (120 mg, 80%,

>20:1 dr, 87% ee).  $[\alpha]_D^{20} = +33.1$  ( $c = 0.52$ , CHCl<sub>3</sub>); <sup>1</sup>H NMR (400 MHz, CDCl<sub>3</sub>) δ 7.53 – 7.45 (m, 2H), 7.14 – 7.06 (m, 2H), 6.99 – 6.91 (m, 2H), 6.69 – 6.61 (m, 2H), 5.71 (ddt,  $J = 17.3$ , 10.3, 7.1 Hz, 1H), 5.37 (d,  $J = 7.1$  Hz, 1H), 5.10 (ddt,  $J = 10.2$ , 2.0, 1.0 Hz, 1H), 5.00 (app. dq,  $J = 17.2$ , 1.5 Hz, 1H), 4.40 (dd,  $J = 7.1$ , 3.1 Hz, 1H), 3.89 (dt,  $J = 9.3$ , 3.3 Hz, 1H), 3.74 (s, 3H), 2.46 – 2.36 (m, 1H), 2.34 (s, 3H), 2.19 (dddd,  $J = 12.6$ , 6.9, 3.2, 1.6 Hz, 1H), 0.98 – 0.91 (m, 21H); <sup>13</sup>C NMR (101 MHz, CDCl<sub>3</sub>) δ 158.9, 142.9, 138.2, 133.3, 131.6, 129.3, 128.4, 127.2, 119.0, 113.5, 77.2, 58.6, 55.4, 38.9, 21.6, 18.2, 18.1, 12.8; IR (ATR):  $\tilde{\nu} = 3307$ , 2943, 2867, 1613, 1518, 1464, 1429, 1413, 1322, 1288, 1270, 1246, 1185, 1157, 1109, 1077, 1028, 1014, 961, 918, 881, 858, 813, 748; HRMS (ESI<sup>+</sup>,  $m/z$ ) calculated for [C<sub>28</sub>H<sub>43</sub>NO<sub>4</sub>SSi+Na]<sup>+</sup> ([M+Na]<sup>+</sup>) 540.2574, found 540.2579.

The ee was determined by HPLC analysis: Chiralpak 150 mm IC-3, Ø 4.6 mm i. d., *n*-heptane/*i*-propanol = 95:5,  $v = 1.0$  mL/min,  $\lambda = 225$  nm,  $t(\text{minor}) = 14.02$  min,  $t(\text{major}) = 17.72$  min.

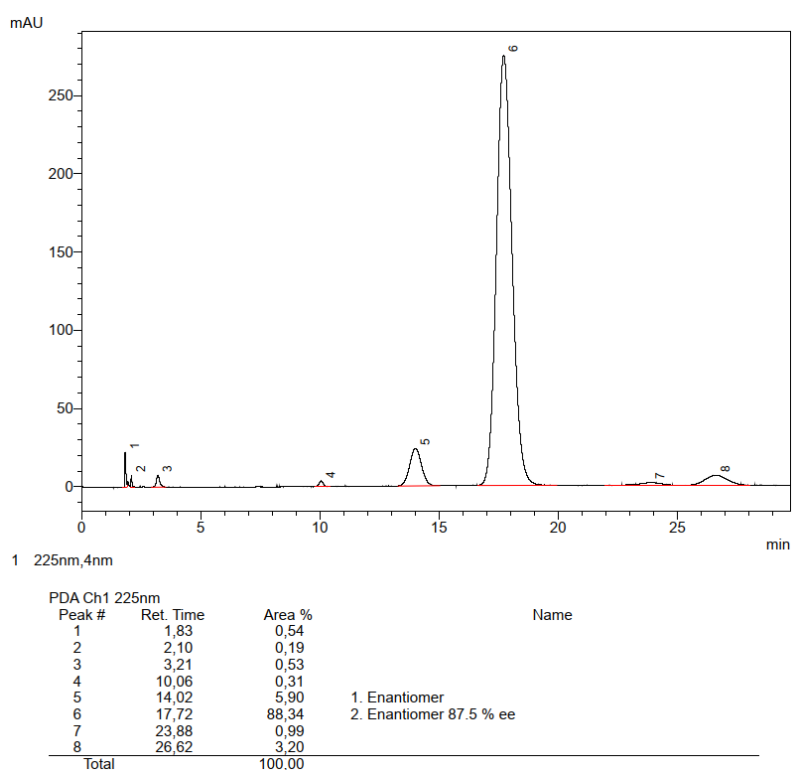

Determination of the ee of **13b**

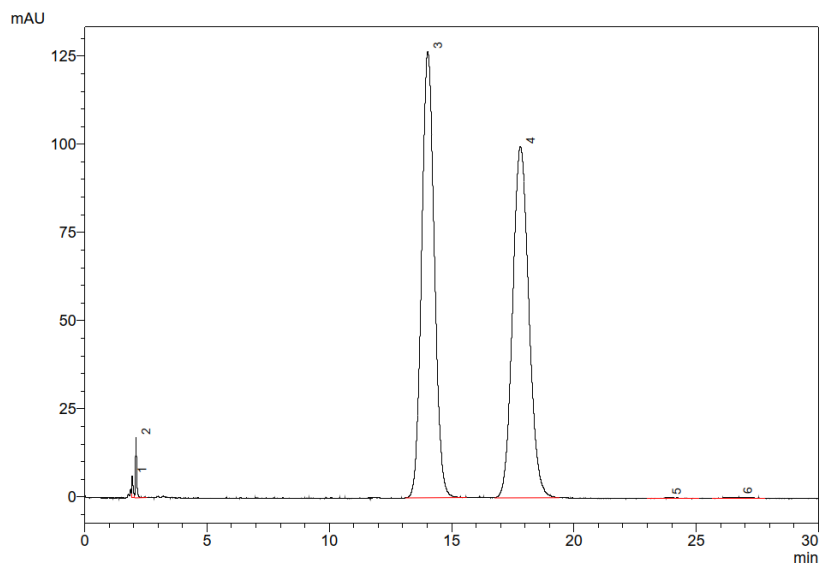

| Peak # | Ret. Time | Area % | Name          |
|--------|-----------|--------|---------------|
| 1      | 1,94      | 0,22   |               |
| 2      | 2,10      | 0,62   |               |
| 3      | 14,03     | 49,28  | 1. Enantiomer |
| 4      | 17,82     | 49,51  | 2. Enantiomer |
| 5      | 23,80     | 0,11   |               |
| 6      | 26,70     | 0,26   |               |
| Total  |           | 100,00 |               |

### Separation of the enantiomers of *rac-13b*



**4-Methyl-*N*-((1*S*,2*S*)-1-(4-(trifluoromethyl)phenyl)-2-((triisopropylsilyl)oxy)pent-4-en-1-yl)benzenesulfonamide (13c).** Prepared according to the representative procedure **A**.

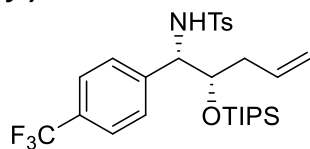

Purified by flash chromatography (SiO<sub>2</sub>; hexane/methyl *tert*-butyl ether, 100:1 to 20:1) to give the title compound as a white solid (100 mg, 62%, >20:1 dr, 93% ee).  $[\alpha]_D^{20} = +32.4$  ( $c = 0.51$ , CHCl<sub>3</sub>); <sup>1</sup>H NMR (400 MHz, CDCl<sub>3</sub>)  $\delta$  7.52 – 7.47 (m, 2H), 7.36 (d,  $J = 8.1$  Hz, 2H), 7.14 (d,  $J = 8.1$  Hz, 2H), 7.07 (d,  $J = 8.1$  Hz, 2H), 5.72 (ddt,  $J = 17.3, 10.3, 7.1$  Hz, 1H), 5.45 (dd,  $J = 7.2, 2.1$  Hz, 1H), 5.16 (dd,  $J = 10.1, 1.8$  Hz, 1H), 5.04 (app. dq,  $J = 17.2, 1.5$  Hz, 1H), 4.54 (dd,  $J = 7.8, 2.4$  Hz, 1H), 3.91 (dt,  $J = 9.7, 3.2$  Hz, 1H), 2.50 – 2.40 (m, 1H), 2.32 (s, 3H), 2.25 (dddd,  $J = 13.9, 6.5, 3.3, 1.6$  Hz, 1H), 0.96 – 0.84 (m, 21H); <sup>13</sup>C NMR (101 MHz, CDCl<sub>3</sub>)  $\delta$  143.8, 143.4, 137.8, 132.8, 129.6 (q,  $^2J_{CF} = 32.3$  Hz), 129.4, 127.6, 127.1, 125.0 (q,  $^3J_{CF} = 3.8$  Hz), 124.2 (q,  $^1J_{CF} = 272.1$  Hz), 119.6, 77.1, 58.5, 39.0, 21.4, 18.1, 17.9, 12.8; <sup>19</sup>F NMR (282 MHz, CDCl<sub>3</sub>)  $\delta$  –62.6; IR (ATR):  $\tilde{\nu} = 3286, 2943, 2867, 1621, 1599, 1466, 1426, 1403, 1324, 1273, 1160, 1112, 1067, 1017, 992, 974, 922, 882, 850, 824, 809, 782, 756, 746$ ; HRMS (ESI<sup>+</sup>,  $m/z$ ) calculated for [C<sub>28</sub>H<sub>40</sub>NO<sub>3</sub>SF<sub>3</sub>Si+Na]<sup>+</sup> ([M+Na]<sup>+</sup>) 578.2342, found 578.2346.

The ee was determined by HPLC analysis: Chiralpak 150 mm IC-3,  $\varnothing$  4.6 mm i. d., *n*-heptane/*i*-propanol = 98:2,  $v = 1.0$  mL/min,  $\lambda = 220$  nm,  $t(\text{minor}) = 8.89$  min,  $t(\text{major}) = 10.32$  min.

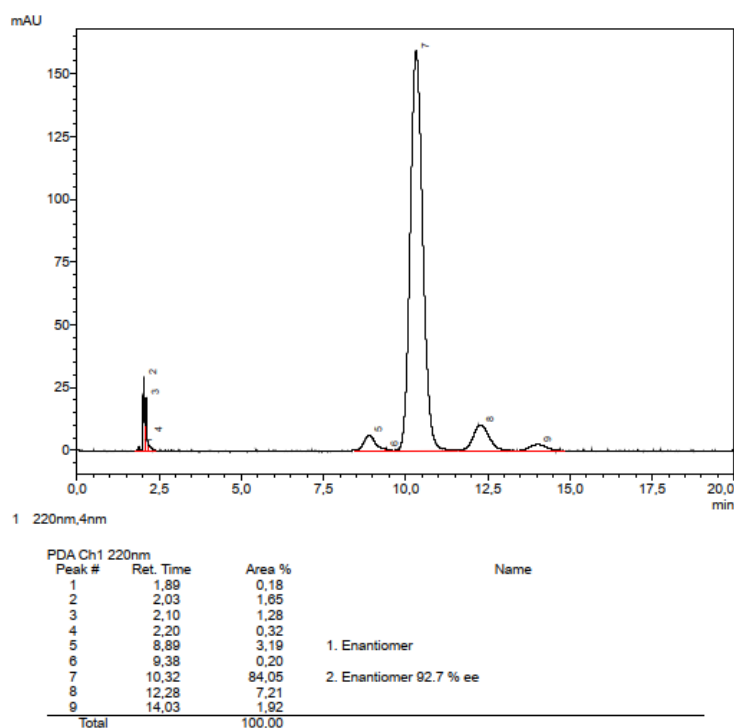

Determination of the ee of **13c**

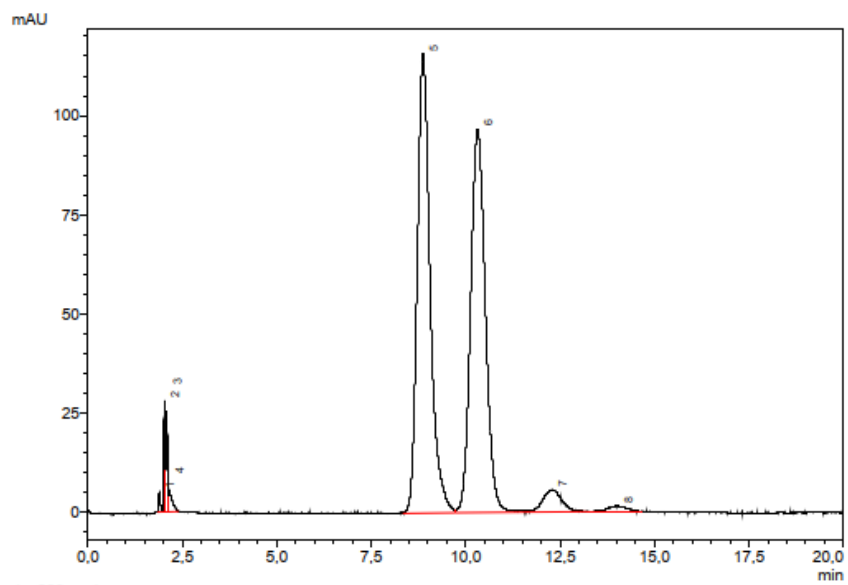

| Peak # | Ret. Time | Area % | Name          |
|--------|-----------|--------|---------------|
| 1      | 1,89      | 0,30   |               |
| 2      | 2,02      | 1,21   |               |
| 3      | 2,09      | 1,13   |               |
| 4      | 2,15      | 0,62   |               |
| 5      | 8,87      | 47,27  | 1. Enantiomer |
| 6      | 10,32     | 45,23  | 2. Enantiomer |
| 7      | 12,28     | 3,37   |               |
| 8      | 14,03     | 0,88   |               |
| Total  |           | 100,00 |               |

Separation of enantiomers of *rac-13c*

***N*-((1*S*,2*S*)-1-(4-Chlorophenyl)-2-((triisopropylsilyloxy)pent-4-en-1-yl)-4-methyl-**

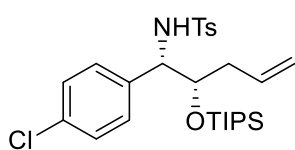

**benzenesulfonamide (13d).** Prepared according to the representative procedure **A**. Purified by flash chromatography (SiO<sub>2</sub>; hexane/methyl *tert*-butyl ether, 100:1 to 20:1) to give the title compound as a white solid (129 mg, 85%, >20:1 dr, 91% ee).  $[\alpha]_D^{20}$

= +41.5 (*c* = 0.48, CHCl<sub>3</sub>); <sup>1</sup>H NMR (400 MHz, CDCl<sub>3</sub>) δ 7.56 – 7.51 (m, 2H), 7.17 – 7.13 (m, 2H), 7.13 – 7.08 (m, 2H), 7.02 – 6.97 (m, 2H), 5.72 (ddt, *J* = 17.3, 10.3, 7.1 Hz, 1H), 5.42 (d, *J* = 7.5 Hz, 1H), 5.15 (ddt, *J* = 10.2, 2.0, 0.9 Hz, 1H), 5.04 (app. dq, *J* = 17.2, 1.5 Hz, 1H), 4.47 (dd, *J* = 7.5, 2.6 Hz, 1H), 3.91 (dt, *J* = 9.6, 3.1 Hz, 1H), 2.50 – 2.40 (m, 1H), 2.39 (s, 3H), 2.25 (dddd, *J* = 12.5, 6.8, 3.2, 1.6 Hz, 1H), 0.99 – 0.89 (m, 21H); <sup>13</sup>C NMR (101 MHz, CDCl<sub>3</sub>) δ 143.3, 138.3, 138.0, 133.1, 133.0, 129.4, 128.6, 128.2, 127.1, 119.4, 77.1, 58.3, 38.9, 21.6, 18.2, 18.0, 12.8; IR (ATR):  $\tilde{\nu}$  = 3290, 2963, 2946, 2865, 1493, 1464, 1422, 1400, 1330, 1292, 1278, 1257, 1161, 1091, 1067, 1013, 996, 937, 921, 881, 847, 810, 758, 709, 669, 607; HRMS (ESI<sup>+</sup>, *m/z*) calculated for [C<sub>27</sub>H<sub>40</sub>NO<sub>3</sub>SCiSi+Na]<sup>+</sup> ([M+Na]<sup>+</sup>) 544.2079, found 544.2085.

The ee was determined by HPLC analysis: Chiralpak 150 mm IC-3, Ø 4.6 mm i. d., *n*-heptane/*i*-propanol = 98:2, *v* = 1.0 mL/min, λ = 225 nm, *t*(minor) = 12.78 min, *t*(major) = 15.29 min.

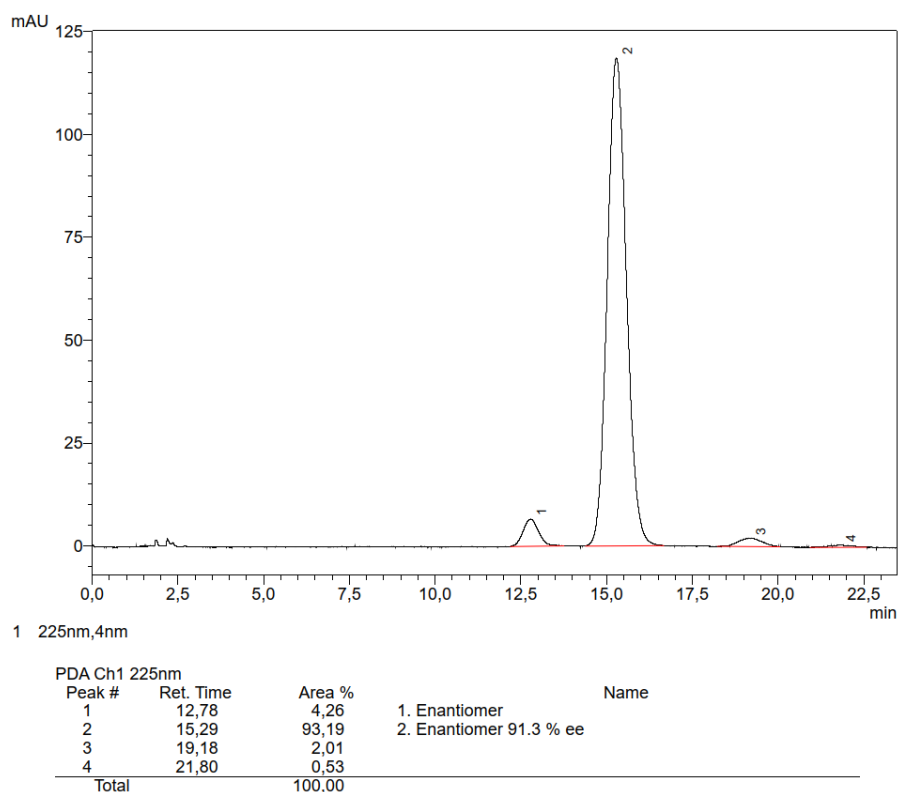

Determination of the ee of **13d**

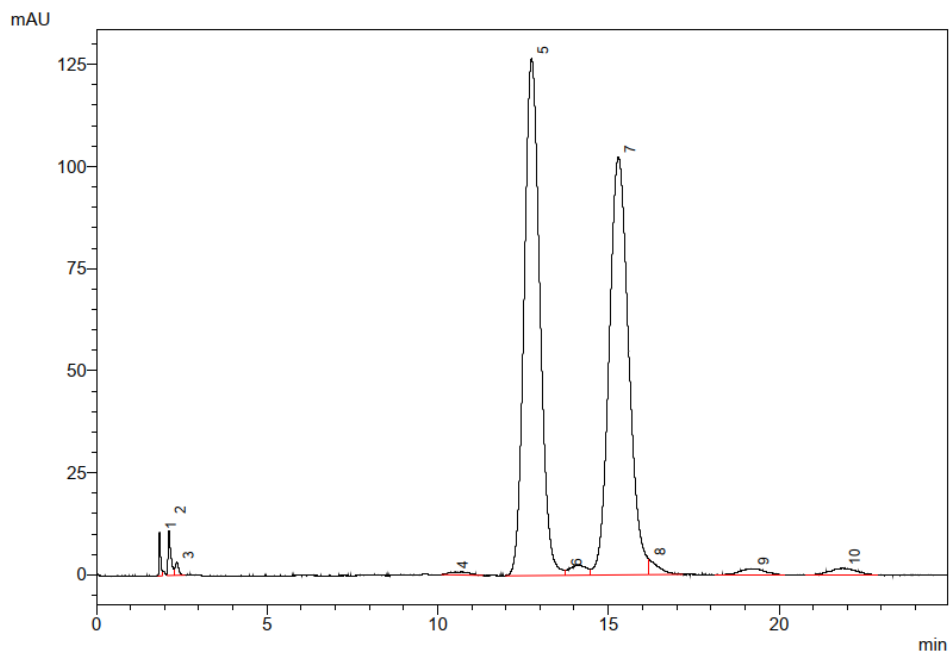

1 225nm,4nm

| PDA Ch1 225nm |           |        |               |
|---------------|-----------|--------|---------------|
| Peak #        | Ret. Time | Area % | Name          |
| 1             | 1,85      | 0,41   |               |
| 2             | 2,13      | 0,71   |               |
| 3             | 2,36      | 0,28   |               |
| 4             | 10,39     | 0,38   |               |
| 5             | 12,75     | 47,23  | 1. Enantiomer |
| 6             | 13,74     | 0,97   |               |
| 7             | 15,30     | 47,22  | 2. Enantiomer |
| 8             | 16,18     | 0,85   |               |
| 9             | 19,22     | 0,92   |               |
| 10            | 21,88     | 1,04   |               |
| Total         |           | 100,00 |               |

### Separation of enantiomers of *rac*-13d

***N*-((1*S*,2*S*)-1-(4-Bromophenyl)-2-((triisopropylsilyl)oxy)pent-4-en-1-yl)-4-methyl-**

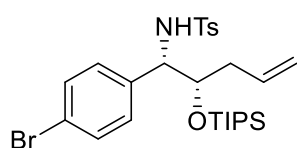

**benzenesulfonamide (13e).** Prepared according to the representative procedure **A**. Purified by flash chromatography (SiO<sub>2</sub>; hexane/methyl *tert*-butyl ether, 100:1 to 20:1) to give the title compound as a white solid (146 mg, 89%, >20:1 dr, 94% ee).  $[\alpha]_D^{20} = +35.3$  ( $c = 0.49$ , CHCl<sub>3</sub>); <sup>1</sup>H NMR (400 MHz, CDCl<sub>3</sub>)  $\delta$  7.52 – 7.49 (m, 2H), 7.26 – 7.22 (m, 2H), 7.14 – 7.10 (m, 2H), 6.94 – 6.88 (m, 2H), 5.70 (ddt,  $J = 17.4, 10.3, 6.9$  Hz, 1H), 5.38 (d,  $J = 7.5$  Hz, 1H), 5.13 (ddt,  $J = 10.3, 2.0, 1.0$  Hz, 1H), 5.01 (app. dq,  $J = 17.2, 1.5$  Hz, 1H), 4.42 (dd,  $J = 7.5, 2.7$  Hz, 1H), 3.88 (dt,  $J = 9.6, 3.1$  Hz, 1H), 2.47 – 2.38 (m, 1H), 2.37 (s, 3H), 2.22 (dddd,  $J = 13.9, 6.4, 3.3, 1.5$  Hz, 1H), 0.96 – 0.88 (m, 21H); <sup>13</sup>C NMR (101 MHz, CDCl<sub>3</sub>)  $\delta$  143.3, 138.8, 137.9, 132.9, 131.1, 129.4, 129.0, 127.1, 121.2, 119.4, 77.0, 58.4, 38.9, 21.6, 18.2, 18.0, 12.8; IR (ATR):  $\tilde{\nu} = 3287, 2945, 2865, 1463, 1421, 1398, 1330, 1291, 1278, 1161, 1131, 1094, 1071, 1010, 995, 937, 921, 881, 846, 808, 774, 709, 674, 661, 607$ ; HRMS (ESI<sup>+</sup>,  $m/z$ ) calculated for [C<sub>27</sub>H<sub>40</sub>NO<sub>3</sub>SSiBr+Na]<sup>+</sup> ([M+Na]<sup>+</sup>) 588.1574, found 588.1581.

The ee was determined by HPLC analysis: Chiralpak 150 mm IC-3,  $\varnothing$  4.6 mm i. d., *n*-heptane/*i*-propanol = 98:2,  $v = 1.0$  mL/min,  $\lambda = 225$  nm,  $t(\text{minor}) = 12.60$  min,  $t(\text{major}) = 15.14$  min.

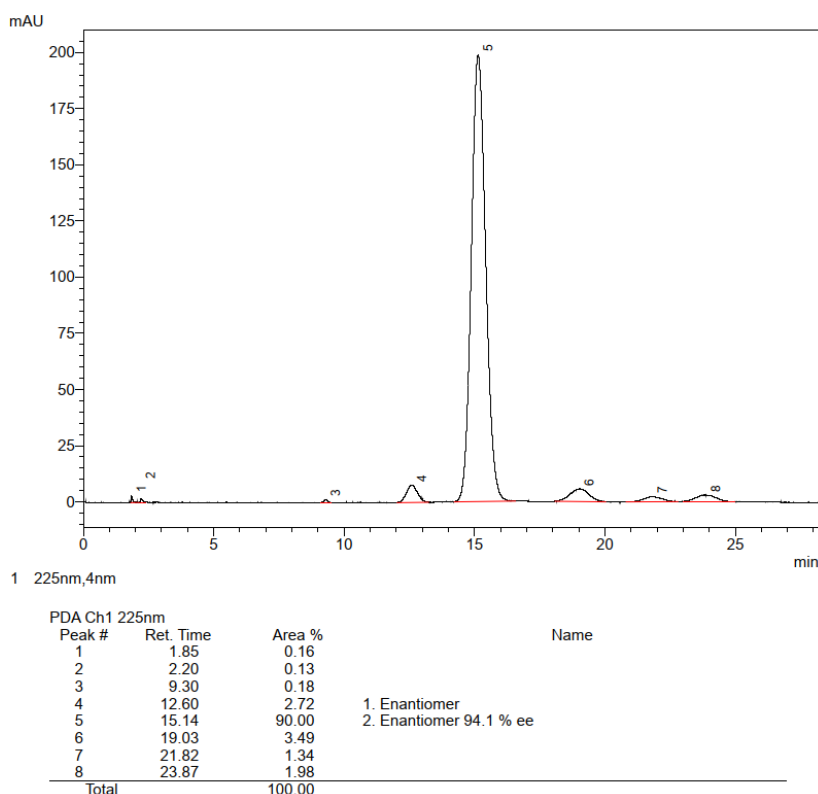

Determination of the ee of **13e**

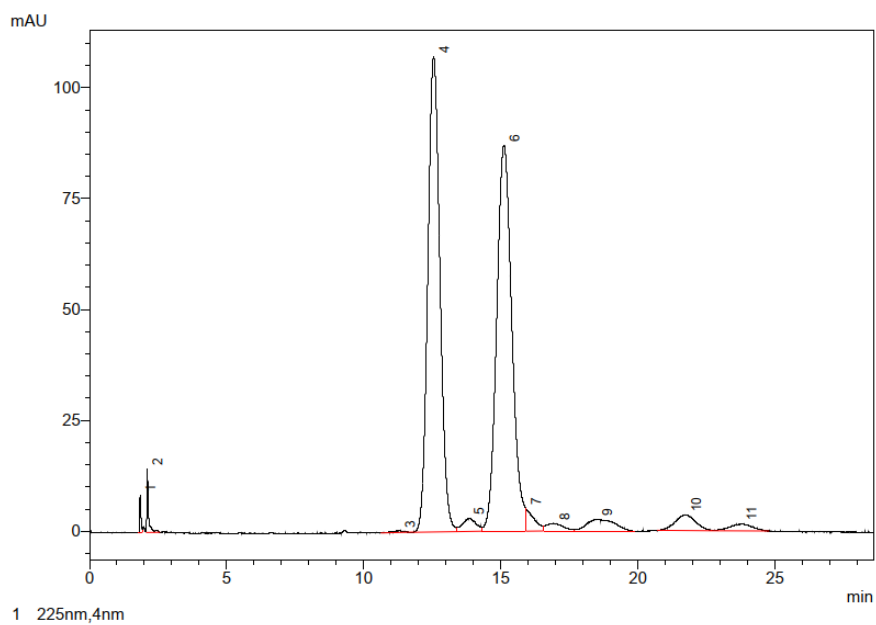

| Peak # | Ret. Time | Area % | Name          |
|--------|-----------|--------|---------------|
| 1      | 1,85      | 0,34   |               |
| 2      | 2,11      | 0,80   |               |
| 3      | 11,31     | 0,15   |               |
| 4      | 12,56     | 43,93  | 1. Enantiomer |
| 5      | 13,82     | 1,37   |               |
| 6      | 15,12     | 44,68  | 2. Enantiomer |
| 7      | 15,91     | 1,45   |               |
| 8      | 16,95     | 1,03   |               |
| 9      | 18,50     | 2,53   |               |
| 10     | 21,75     | 2,50   |               |
| 11     | 23,77     | 1,21   |               |
| Total  |           | 100,00 |               |

Separation of the enantiomers of *rac*-13e

**4-Methyl-*N*-((1*S*,2*S*)-1-(4-(4,4,5,5-tetramethyl-1,3,2-dioxaborolan-2-yl)phenyl)-2-((tri-isopropylsilyloxy)pent-4-en-1-yl)benzenesulfonamide (13f).**

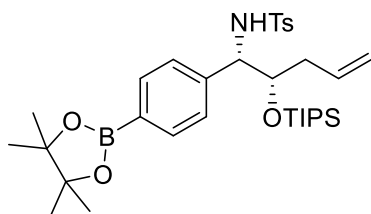

Prepared according to the representative procedure **A**. Purified by flash chromatography (SiO<sub>2</sub>; hexane/methyl *tert*-butyl ether, 50:1 to 10:1) to give the title compound as a white solid (132 mg, 74%, >20:1 dr, 88% ee).  $[\alpha]_D^{20} = +33.3$  ( $c = 0.62$ , CHCl<sub>3</sub>);

<sup>1</sup>H NMR (400 MHz, CDCl<sub>3</sub>)  $\delta$  7.54 – 7.51 (m, 2H), 7.51 – 7.47 (m, 2H), 7.06 – 7.03 (m, 2H), 7.02 – 6.99 (m, 2H), 5.74 (ddt,  $J = 17.3, 10.3, 7.1$  Hz, 1H), 5.40 (d,  $J = 7.7$  Hz, 1H), 5.13 (ddt,  $J = 10.2, 1.8, 0.9$  Hz, 1H), 5.05 (app. dq,  $J = 17.1, 1.5$  Hz, 1H), 4.46 (dd,  $J = 7.7, 2.6$  Hz, 1H), 3.93 (dt,  $J = 9.5, 3.1$  Hz, 1H), 2.52 – 2.40 (m, 1H), 2.32 (s, 3H), 2.22 (dddd,  $J = 13.9, 6.8, 3.2, 1.6$  Hz, 1H), 1.34 (app. d,  $J = 1.9$  Hz, 12H), 0.97 – 0.87 (m, 21H); <sup>13</sup>C NMR (101 MHz, CDCl<sub>3</sub>)  $\delta$  142.9, 142.6, 138.0, 134.6, 133.2, 129.3, 127.1, 126.6, 119.3, 83.9, 77.4, 59.0, 39.0, 25.0, 24.9, 21.5, 18.2, 18.1, 12.8; IR (ATR):  $\tilde{\nu} = 3293, 2943, 2866, 1612, 1463, 1391, 1356, 1329, 1214, 1163, 1144, 1088, 1067, 1019, 995, 961, 922, 882, 858, 811, 745$ ; HRMS (ESI<sup>+</sup>,  $m/z$ ) calculated for [C<sub>33</sub>H<sub>52</sub>BNO<sub>5</sub>SSi+Na]<sup>+</sup> ([M+Na]<sup>+</sup>) 636.3321, found 636.3324.

The ee was determined by HPLC analysis: Chiralpak 150 mm IB-N-3,  $\varnothing$  4.6 mm i. d., *n*-heptane/*i*-propanol = 98:2,  $\nu = 1.0$  mL/min,  $\lambda = 225$  nm,  $t(\text{minor}) = 3.66$  min,  $t(\text{major}) = 4.05$  min.

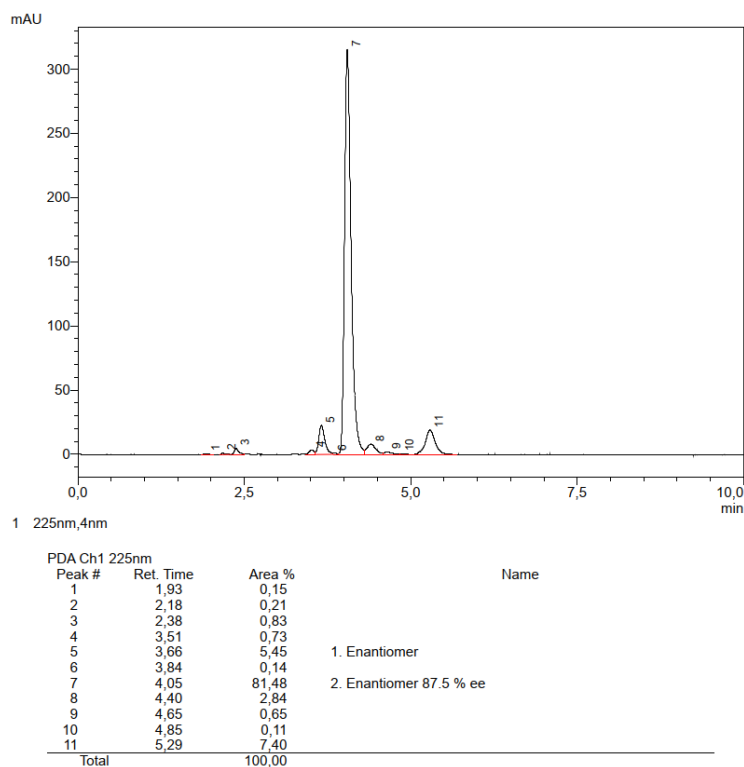

**Determination of the ee of 13f**

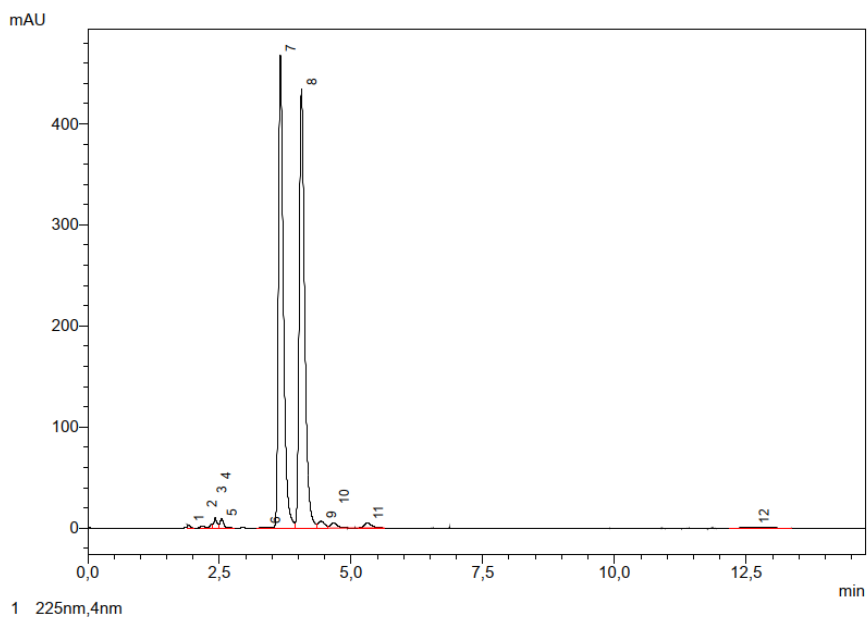

| Peak # | Ret. Time | Area % | Name          |
|--------|-----------|--------|---------------|
| 1      | 1,91      | 0,21   |               |
| 2      | 2,16      | 0,23   |               |
| 3      | 2,35      | 0,21   |               |
| 4      | 2,42      | 0,69   |               |
| 5      | 2,54      | 0,78   |               |
| 6      | 3,37      | 0,14   |               |
| 7      | 3,66      | 46,98  | 1. Enantiomer |
| 8      | 4,06      | 47,59  | 2. Enantiomer |
| 9      | 4,43      | 0,93   |               |
| 10     | 4,67      | 0,75   |               |
| 11     | 5,32      | 0,77   |               |
| 12     | 12,64     | 0,73   |               |
| Total  |           | 100,00 |               |

Separation of the enantiomers of *rac*-13f



**4-Methyl-*N*-((1*S*,2*S*)-1-(naphthalen-2-yl)-2-((triisopropylsilyl)oxy)pent-4-en-1-yl)-benzenesulfonamide (14).** Prepared according to the representative procedure **A**. Purified by

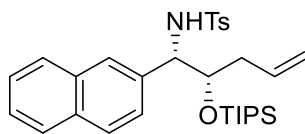

flash chromatography (SiO<sub>2</sub>; hexane/methyl *tert*-butyl ether 100:1 to 20:1) to give the title compound as a white solid (145 mg, 93%,

>20:1 dr, 88% ee).  $[\alpha]_D^{20} = +56.5$  ( $c = 0.52$ , CHCl<sub>3</sub>); <sup>1</sup>H NMR (400

MHz, CDCl<sub>3</sub>)  $\delta$  7.79 – 7.72 (m, 1H), 7.63 (d,  $J = 8.5$  Hz, 1H), 7.58 (dt,  $J = 8.4, 3.3$  Hz, 1H), 7.52 – 7.47 (m, 2H), 7.45 – 7.42 (m, 2H), 7.41 (d,  $J = 1.7$  Hz, 1H), 7.17 (dd,  $J = 8.5, 1.8$  Hz, 1H), 6.97 – 6.90 (m, 2H), 5.83 (ddt,  $J = 17.3, 10.3, 7.1$  Hz, 1H), 5.53 (d,  $J = 7.6$  Hz, 1H), 5.20 (ddt,  $J = 10.2, 1.8, 0.9$  Hz, 1H), 5.12 (app. dq,  $J = 17.1, 1.5$  Hz, 1H), 4.66 (dd,  $J = 7.6, 2.7$  Hz, 1H), 4.05 (dt,  $J = 9.6, 3.1$  Hz, 1H), 2.59 – 2.50 (m, 1H), 2.30 (dddd,  $J = 13.8, 6.7, 3.2, 1.5$  Hz, 1H), 2.17 (s, 3H), 0.96 – 0.87 (m, 21H); <sup>13</sup>C NMR (101 MHz, CDCl<sub>3</sub>)  $\delta$  143.0, 138.1, 136.6, 133.2, 133.0, 132.7, 129.2, 127.9, 127.8, 127.6, 127.1, 126.5, 126.0, 125.8, 125.1, 119.3, 77.0, 59.1, 39.1, 21.3, 18.2, 18.0, 12.8; IR (ATR):  $\tilde{\nu} = 3286, 2942, 2889, 2865, 1599, 1508, 1464, 1411, 1328, 1289, 1272, 1164, 1067, 1015, 996, 951, 915, 882, 857, 810, 744$ ; HRMS (ESI<sup>+</sup>,  $m/z$ ) calculated for [C<sub>31</sub>H<sub>43</sub>NO<sub>3</sub>SSi+Na]<sup>+</sup> ([M+Na]<sup>+</sup>) 560.2625, found 560.2631.

The ee was determined by HPLC analysis: Chiralpak 150 mm IB-N-3,  $\varnothing$  4.6 mm i. d., *n*-heptane/*i*-propanol = 98:2,  $\nu = 1.0$  mL/min,  $\lambda = 230$  nm,  $t(\text{minor}) = 4.35$  min,  $t(\text{major}) = 4.63$  min.

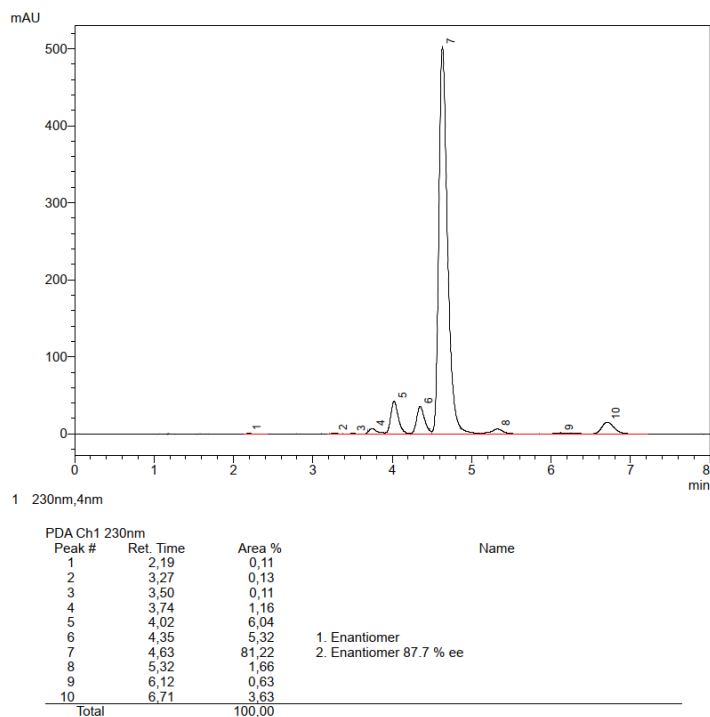

Determination of the ee of **14**

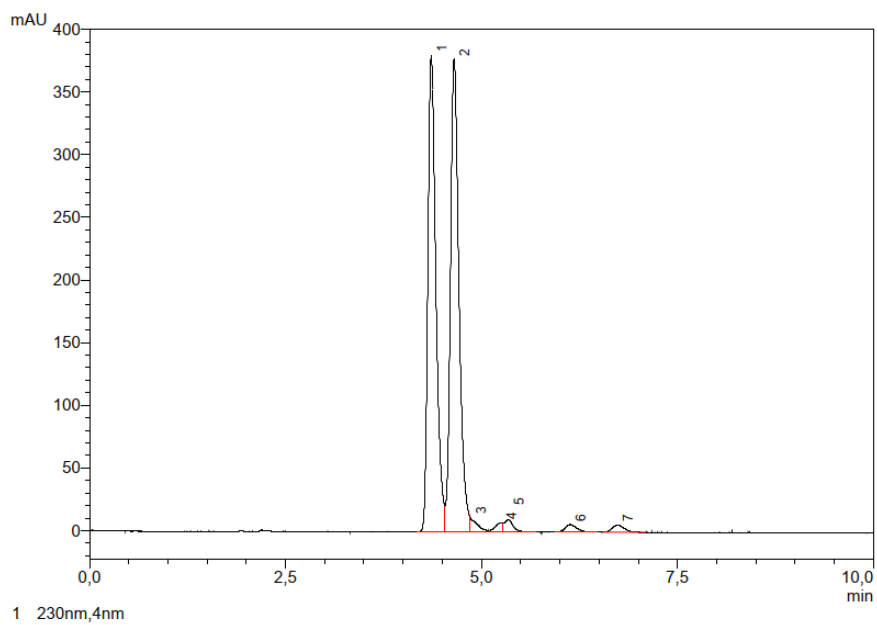

| PDA Ch1 230nm |           |        |               |  |
|---------------|-----------|--------|---------------|--|
| Peak #        | Ret. Time | Area % | Name          |  |
| 1             | 4,36      | 45,98  | 1. Enantiomer |  |
| 2             | 4,65      | 48,46  | 2. Enantiomer |  |
| 3             | 4,86      | 1,24   |               |  |
| 4             | 5,25      | 0,78   |               |  |
| 5             | 5,35      | 1,35   |               |  |
| 6             | 6,13      | 1,10   |               |  |
| 7             | 6,73      | 1,09   |               |  |
| Total         |           | 100,00 |               |  |

### Separation of enantiomers of *rac*-14

**4-Methyl-*N*-((1*S*,2*S*)-1-(*o*-tolyl)-2-((triisopropylsilyl)oxy)pent-4-en-1-yl)benzenesulfonamide (15).** Prepared according to the representative procedure **A**. Purified by flash

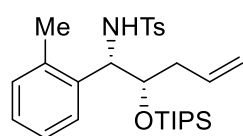

chromatography (SiO<sub>2</sub>; hexane/methyl *tert*-butyl ether, 100:1 to 20:1) to give the title compound as a white solid (116 mg, 80%, >20:1 dr, 83% ee).

$[\alpha]_D^{20} = +18.4$  ( $c = 0.50$ , CHCl<sub>3</sub>); <sup>1</sup>H NMR (400 MHz, CDCl<sub>3</sub>) δ 7.49 – 7.44 (m, 2H), 7.05 – 7.00 (m, 2H), 6.99 – 6.95 (m, 2H), 6.93 – 6.91 (m, 1H), 6.84 – 6.78 (m, 1H), 5.79 (dddd,  $J = 17.0, 10.3, 7.9, 6.7$  Hz, 1H), 5.43 (d,  $J = 8.4$  Hz, 1H), 5.19 – 5.08 (m, 2H), 4.77 (dd,  $J = 8.4, 1.9$  Hz, 1H), 3.81 (ddd,  $J = 10.2, 3.4, 1.8$  Hz, 1H), 2.58 (ddd,  $J = 13.6, 9.9, 7.6$  Hz, 1H), 2.33 – 2.26 (m, 1H), 2.29 (s, 3H), 2.20 (s, 3H), 0.96 – 0.84 (m, 21H); <sup>13</sup>C NMR (101 MHz, CDCl<sub>3</sub>) δ 142.8, 138.2, 137.2, 134.3, 133.1, 130.2, 129.2, 127.4, 126.9 (2C), 125.4, 119.5, 75.5, 54.8, 39.5, 21.5, 19.5, 18.2, 18.0, 12.9; IR (ATR):  $\tilde{\nu} = 3276, 2942, 2889, 2866, 1463, 1411, 1327, 1290, 1162, 1094, 1065, 1014, 920, 882, 851, 814, 762, 707, 662$ ; HRMS (ESI<sup>+</sup>,  $m/z$ ) calculated for [C<sub>28</sub>H<sub>43</sub>NO<sub>3</sub>SSi+Na]<sup>+</sup> ([M+Na]<sup>+</sup>) 524.2625, found 524.2631.

94 mg of the product were recrystallized from methyl *tert*-butyl ether/*n*-hexane. The mother liquor was decanted and concentrated to give the enantioenriched product in 86% ee (65 mg).

The ee was determined by 2D HPLC analysis; Step 1: Purification: 50 mm Zorbax Eclipse Plus C18, Ø 4.6 mm i. d., methanol/water gradient 70% to 90% over 5 minutes,  $v = 1.0$  mL/min,  $\lambda = 220$  nm,  $t(\text{major}) = 7.88$  min, 308 K.

**<sup>1</sup>D chromatogram(s)**

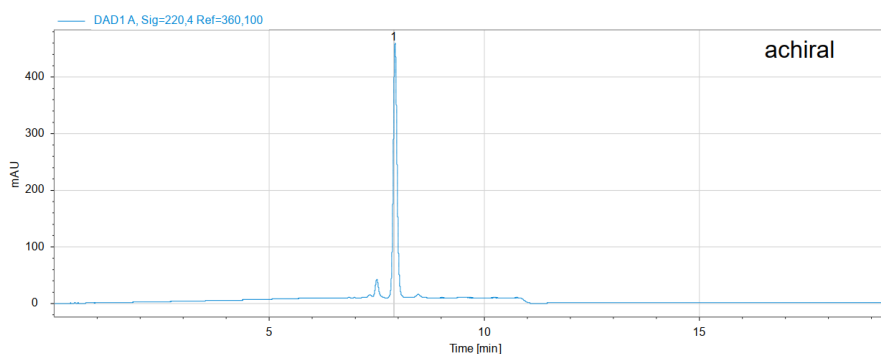

**Sampling table (<sup>1</sup>D)**

| Cut group | Cut # | <sup>1</sup> D Cut start [min] | <sup>1</sup> D Ret. time [min] | <sup>1</sup> D Duration [min] | Trigger | <sup>1</sup> D Run start [min] | product |
|-----------|-------|--------------------------------|--------------------------------|-------------------------------|---------|--------------------------------|---------|
|           | 1     | 7.88                           | ***                            | 0.04                          | Peak    | 7.92                           | product |

Separation of impurities on an achiral column

Step 2: Resolution of the enantiomers: Daicel 150 mm Chiralcel OZ-3R,  $\varnothing$  4.6 mm i. d., acetonitrile/water = 90:10,  $v = 1.0$  mL/min,  $\lambda = 220$  nm,  $t(\text{major}) = 3.58$  min,  $t(\text{minor}) = 4.75$  min.

#### Cut# : 1

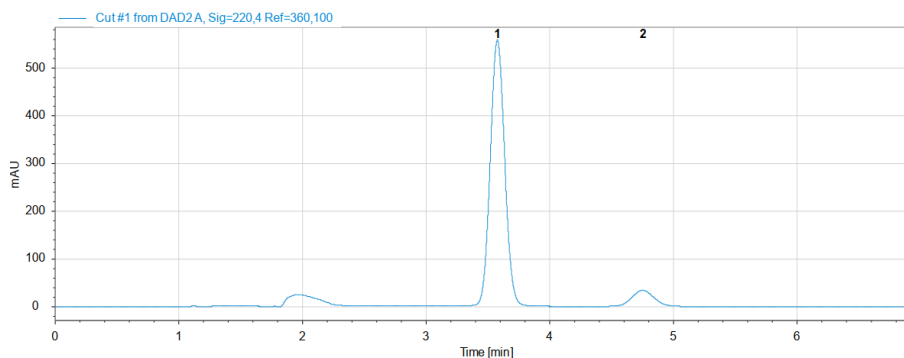

Signal: DAD2 A, Sig=220,4 Ref=360,100

| Compound | Cut | Ret.Time | Area                 | Width | Height  | Symmetry |
|----------|-----|----------|----------------------|-------|---------|----------|
| 1        | 1   | 3.578    | 4555.609<br>4555.609 | 0.127 | 557.298 | 0.904    |
| 2        | 1   | 4.754    | 416.534<br>416.534   | 0.192 | 33.487  | 0.933    |

#### Component table

Signal: DAD2 A, Sig=220,4 Ref=360,100

| Component | <sup>1</sup> D Sampling range [min] | Ret.Time <sup>2</sup> D [min] | Area     | Area%  | chiral         |
|-----------|-------------------------------------|-------------------------------|----------|--------|----------------|
| 1         | 7.90 - 7.94                         | 3.578                         | 4555.609 | 91.623 | 1st enantiomer |
| 2         | 7.90 - 7.94                         | 4.754                         | 416.534  | 8.377  | 2nd enantiomer |

### Determination of the ee of 15

#### Cut# : 1

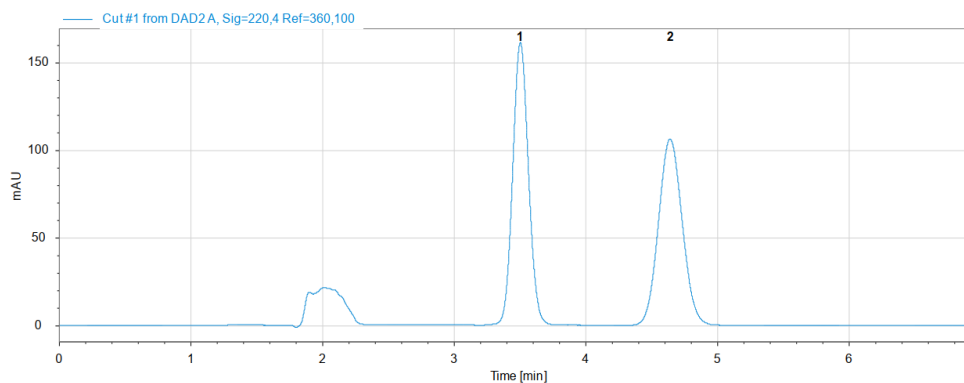

Signal: DAD2 A, Sig=220,4 Ref=360,100

| Compound | Cut | Ret.Time | Area                 | Width | Height  | Symmetry |
|----------|-----|----------|----------------------|-------|---------|----------|
| 1        | 1   | 3.505    | 1337.411<br>1337.411 | 0.128 | 161.245 | 0.912    |
| 2        | 1   | 4.642    | 1334.009<br>1334.009 | 0.195 | 106.426 | 0.914    |

#### Component table

Signal: DAD2 A, Sig=220,4 Ref=360,100

| Component | <sup>1</sup> D Sampling range [min] | Ret.Time <sup>2</sup> D [min] | Area     | Area%  |
|-----------|-------------------------------------|-------------------------------|----------|--------|
| 1         | 7.85 - 7.89                         | 3.505                         | 1337.411 | 50.064 |
| 2         | 7.85 - 7.89                         | 4.642                         | 1334.009 | 49.936 |

### Separation of the enantiomers of *rac*-15

***N*-((1*R*,2*S*)-1-(Furan-2-yl)-2-((triisopropylsilyloxy)pent-4-en-1-yl)-4-methylbenzene-**

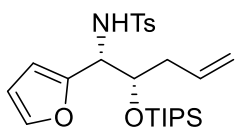

**sulfonamide (16).** Prepared according to the representative procedure **A**.

Purified by flash chromatography (SiO<sub>2</sub>; hexane/methyl *tert*-butyl ether, 100:1 to 20:1) to give the title compound as a white solid (102 mg, 74%,

>20:1 dr, 86% ee). [ $\alpha$ ]<sub>D</sub><sup>20</sup> = +23.9 (*c* = 0.49, CHCl<sub>3</sub>); <sup>1</sup>H NMR (400 MHz,

CDCl<sub>3</sub>)  $\delta$  7.66 – 7.60 (m, 2H), 7.22 – 7.17 (m, 2H), 7.12 (dd, *J* = 1.8, 0.8 Hz, 1H), 6.11 (dd, *J* = 3.3, 1.8 Hz, 1H), 5.91 (app. dt, *J* = 3.3, 0.9 Hz, 1H), 5.70 (dddd, *J* = 16.9, 10.3, 7.8, 6.5 Hz, 1H), 5.27 (d, *J* = 8.9 Hz, 1H), 5.09 (dtd, *J* = 10.3, 1.7, 0.8 Hz, 1H), 5.04 (app. dq, *J* = 17.1, 1.5 Hz, 1H), 4.53 (ddd, *J* = 8.8, 2.2, 0.9 Hz, 1H), 4.15 (ddd, *J* = 9.8, 3.8, 2.1 Hz, 1H), 2.47 – 2.39 (m, 1H), 2.38 (s, 3H), 2.24 (dddd, *J* = 14.0, 6.5, 3.7, 1.7 Hz, 1H), 0.97 – 0.94 (m, 21H); <sup>13</sup>C NMR (101 MHz, CDCl<sub>3</sub>)  $\delta$  152.7, 143.1, 141.4, 138.1, 133.2, 129.5, 127.1, 119.0, 110.4, 107.8, 74.4, 53.9, 38.8, 21.6, 18.1(2), 18.0(6), 12.7; IR (ATR):  $\tilde{\nu}$  = 3312, 2943, 2864, 1598, 1499, 1464, 1421, 1382, 1326, 1289, 1255, 1160, 1141, 1085, 1065, 1012, 994, 919, 883, 810, 758; HRMS (ESI<sup>+</sup>, *m/z*) calculated for [C<sub>25</sub>H<sub>39</sub>NO<sub>4</sub>SSi+Na]<sup>+</sup> ([M+Na]<sup>+</sup>) 500.2261, found 500.2266.

70 mg of the product were recrystallized from methyl *tert*-butyl ether/*n*-hexane to give a sample of 90% ee (55 mg).

The ee was determined by 2D HPLC analysis; Step 1: Purification: 50 mm Zorbax Eclipse Plus C18,  $\varnothing$  4.6 mm i. d., methanol/water 90:10, *v* = 1.0 mL/min,  $\lambda$  = 220 nm, *t*(major) = 2.33 min, 308 K.

**<sup>1</sup>D chromatogram(s)**

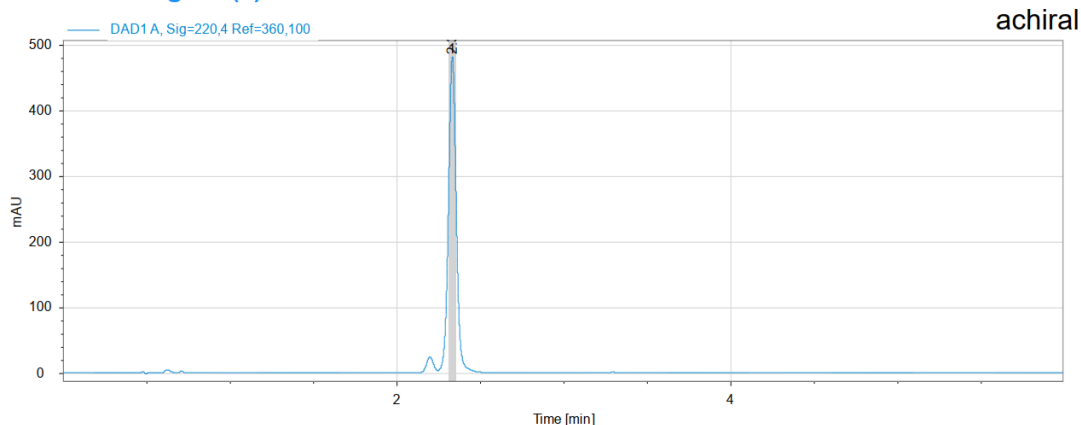

**Sampling table (<sup>1</sup>D)**

| Cut group | Cut # | <sup>1</sup> D Cut start [min] | <sup>1</sup> D Ret. time [min] | <sup>1</sup> D Duration [min] | Trigger | <sup>2</sup> D Run start [min] |
|-----------|-------|--------------------------------|--------------------------------|-------------------------------|---------|--------------------------------|
|           | 1     | 2.31                           | 2.333                          | 0.04                          | Peak    | 2.36                           |

Separation of impurities on an achiral column

Step 2: Chiral resolution of the major diastereomer: Daicel 150 mm Chiralcel OZ-3R,  $\varnothing$  4.6 mm i. d., acetonitrile/water = 80:20,  $v = 1.0$  mL/min,  $\lambda = 220$  nm,  $t(\text{major}) = 4.49$  min,  $t(\text{minor}) = 5.27$  min.

Cut# : 1

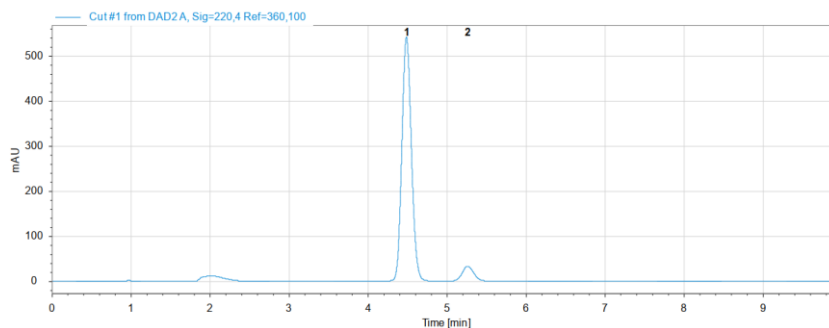

Signal: DAD2 A, Sig=220,4 Ref=360,100

| Compound | Cut | Ret.Time | Area                        | Width | Height  | Symmetry |
|----------|-----|----------|-----------------------------|-------|---------|----------|
| 1        | 1   | 4.490    | 4532.446<br><b>4532.446</b> | 0.130 | 541.465 | 0.883    |
| 2        | 1   | 5.266    | 336.409<br><b>336.409</b>   | 0.155 | 32.709  | 0.900    |

Component table

Signal: DAD2 A, Sig=220,4 Ref=360,100

| Component | 'D Sampling range [min] | Ret.Time 'D [min] | Area     | Area%  |                |
|-----------|-------------------------|-------------------|----------|--------|----------------|
| 1         | 2.33 - 2.37             | 4.490             | 4532.446 | 93.091 | 1st enantiomer |
| 2         | 2.33 - 2.37             | 5.266             | 336.409  | 6.909  | 2nd enantiomer |

chiral

= 86.2 % ee

Determination of the ee of **16** before recrystallization

Cut# : 1

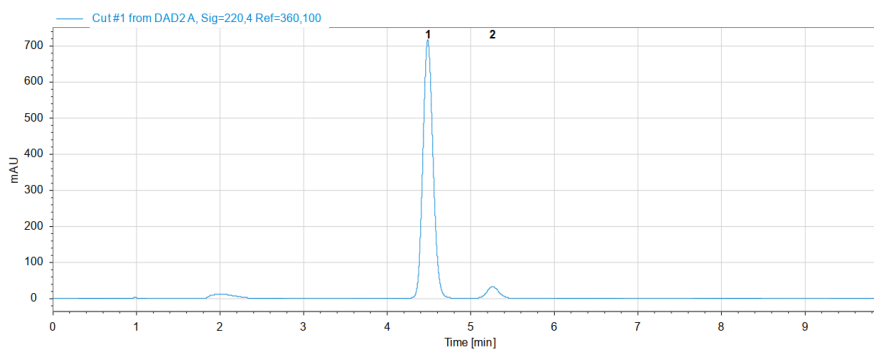

Signal: DAD2 A, Sig=220,4 Ref=360,100

| Compound | Cut | Ret.Time | Area                        | Width | Height  | Symmetry |
|----------|-----|----------|-----------------------------|-------|---------|----------|
| 1        | 1   | 4.490    | 6016.581<br><b>6016.581</b> | 0.131 | 715.768 | 0.881    |
| 2        | 1   | 5.266    | 325.642<br><b>325.642</b>   | 0.156 | 31.825  | 0.906    |

Component table

Signal: DAD2 A, Sig=220,4 Ref=360,100

| Component | 'D Sampling range [min] | Ret.Time 'D [min] | Area     | Area%  |                |
|-----------|-------------------------|-------------------|----------|--------|----------------|
| 1         | 2.31 - 2.35             | 4.490             | 6016.581 | 94.865 | 1st enantiomer |
| 2         | 2.31 - 2.35             | 5.266             | 325.642  | 5.135  | 2nd enantiomer |

chiral

= 89.7 % ee

Determination of the ee of **16** after recrystallization

### Cut# : 1

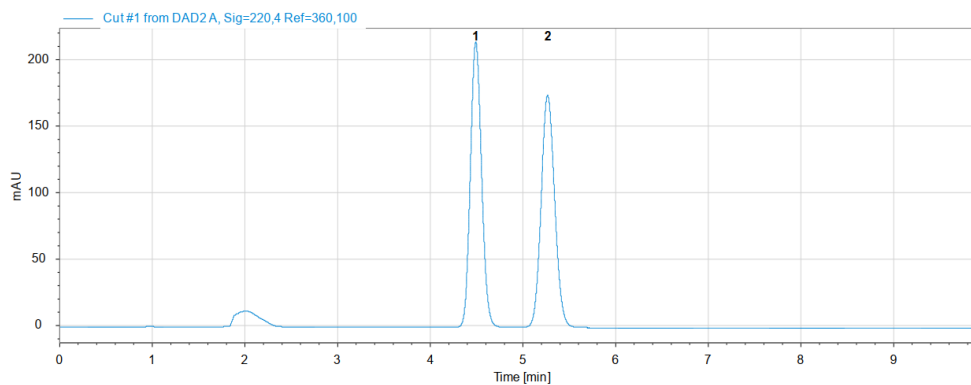

Signal: DAD2 A, Sig=220,4 Ref=360,100

| Compound | Cut | Ret. Time | Area            | Width | Height  | Symmetry |
|----------|-----|-----------|-----------------|-------|---------|----------|
| 1        | 1   | 4.497     | 1802.352        | 0.130 | 214.646 | 0.892    |
|          |     |           | <b>1802.352</b> |       |         |          |
| 2        | 1   | 5.272     | 1793.188        | 0.159 | 174.745 | 0.903    |
|          |     |           | <b>1793.188</b> |       |         |          |

### Component table

Signal: DAD2 A, Sig=220,4 Ref=360,100

| Component | <sup>1</sup> D Sampling range [min] | Ret. Time <sup>2</sup> D [min] | Area     | Area%  | chiral         |
|-----------|-------------------------------------|--------------------------------|----------|--------|----------------|
| 1         | 2.34 - 2.38                         | 4.497                          | 1802.352 | 50.127 | 1st enantiomer |
| 2         | 2.34 - 2.38                         | 5.272                          | 1793.188 | 49.873 | 2nd enantiomer |

Separation of the enantiomers of *rac*-16

**4-Methyl-*N*-((1*R*,2*S*)-1-(thiophen-2-yl)-2-((triisopropylsilyl)oxy)pent-4-en-1-yl)benzene-sulfonamide (17).** Prepared according to the representative procedure **A**.

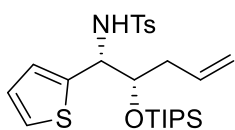

Purified by flash chromatography (SiO<sub>2</sub>; hexane/methyl *tert*-butyl ether, 100:1 to 20:1) to give the title compound as a white solid (127 mg, 89%, >20:1 dr, 73% ee).  $[\alpha]_D^{20} = +17.1$  ( $c = 0.49$ , CHCl<sub>3</sub>); <sup>1</sup>H NMR (400 MHz, CDCl<sub>3</sub>)  $\delta$  7.61 – 7.57 (m, 2H), 7.17 – 7.12 (m, 2H), 7.05 (dd,  $J = 5.1, 1.3$  Hz, 1H), 6.75 (dd,  $J = 5.1, 3.5$  Hz, 1H), 6.70 (app. dt,  $J = 3.5, 1.1$  Hz, 1H), 5.74 (dddd,  $J = 16.9, 10.3, 7.7, 6.5$  Hz, 1H), 5.34 (d,  $J = 8.1$  Hz, 1H), 5.13 (app. dq,  $J = 10.4, 1.1$  Hz, 1H), 5.07 (app. dq,  $J = 17.1, 1.5$  Hz, 1H), 4.77 (ddd,  $J = 8.1, 2.6, 0.9$  Hz, 1H), 4.02 (ddd,  $J = 9.6, 3.6, 2.6$  Hz, 1H), 2.45 (app. dddt,  $J = 14.0, 9.7, 7.7, 1.0$  Hz, 1H), 2.36 (s, 3H), 2.27 (dddd,  $J = 14.0, 6.6, 3.4, 1.7$  Hz, 1H), 1.02 – 0.95 (m, 21H); <sup>13</sup>C NMR (101 MHz, CDCl<sub>3</sub>)  $\delta$  143.5, 143.1, 138.1, 133.2, 129.4, 127.2, 126.3, 125.3, 124.7, 119.3, 77.0, 55.8, 38.7, 21.6, 18.2, 18.1, 12.9; IR (ATR):  $\tilde{\nu} = 3275, 2943, 2889, 2866, 1462, 1433, 1361, 1326, 1290, 1163, 1081, 1033, 1005, 970, 919, 882, 852, 836, 816, 765, 711, 688, 661, 631$ ; HRMS (ESI<sup>+</sup>,  $m/z$ ) calculated for [C<sub>25</sub>H<sub>39</sub>NO<sub>3</sub>S<sub>2</sub>Si+Na]<sup>+</sup> ([M+Na]<sup>+</sup>) 516.2033, found 516.2038.

96 mg of product were recrystallized from methyl *tert*-butyl ether/*n*-hexane. The mother liquor was decanted and concentrated to give a sample of 89% ee (81 mg).

The ee was determined by 2D HPLC analysis; Step 1: Purification: 50 mm Zorbax Eclipse Plus C18,  $\varnothing$  4.6 mm i. d., methanol/water 85:15,  $v = 1.0$  mL/min,  $\lambda = 220$  nm,  $t(\text{major}) = 5.83$  min, 308 K.

**<sup>1</sup>D chromatogram(s)**

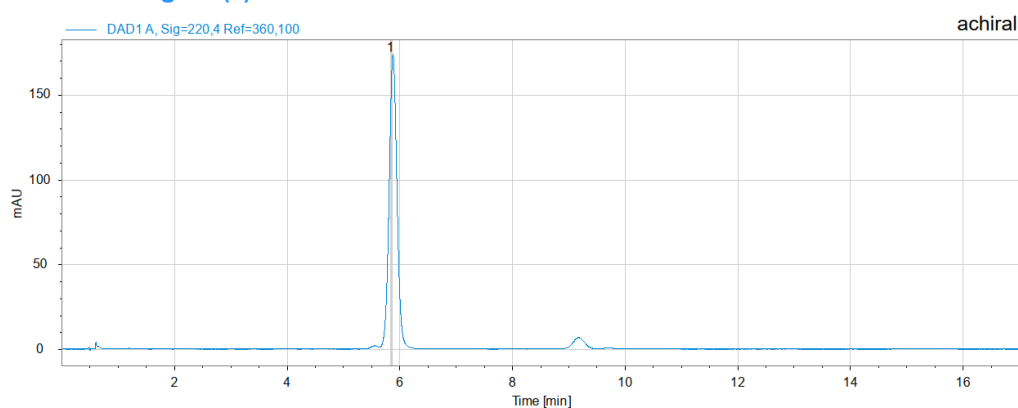

**Sampling table (<sup>1</sup>D)**

| Cut group | Cut # | <sup>1</sup> D Cut start [min] | <sup>1</sup> D Ret. time [min] | <sup>1</sup> D Duration [min] | Trigger | <sup>1</sup> D Run start [min] |
|-----------|-------|--------------------------------|--------------------------------|-------------------------------|---------|--------------------------------|
|           | 1     | 5.83                           | ***                            | 0.04                          | Peak    | 5.87                           |

Separation of impurities on an achiral column



Step 2: Chiral resolution of the major diastereomer: Daicel 150 mm Chiralcel OZ-3R,  $\varnothing$  4.6 mm i. d., acetonitrile/water = 75:25,  $v = 1.0$  mL/min,  $\lambda = 220$  nm,  $t(\text{major}) = 7.67$  min,  $t(\text{minor}) = 8.93$  min.

Cut# : 1

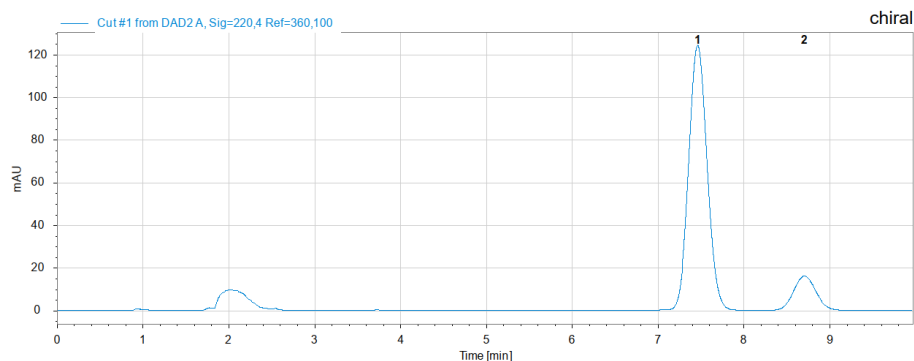

Signal: DAD2 A, Sig=220,4 Ref=360,100

| Compound | Cut | Ret.Time | Area                        | Width | Height  | Symmetry |
|----------|-----|----------|-----------------------------|-------|---------|----------|
| 1        | 1   | 7.467    | 1864.184<br><b>1864.184</b> | 0.228 | 124.442 | 0.922    |
| 2        | 1   | 8.708    | 293.978<br><b>293.978</b>   | 0.223 | 16.201  | 0.955    |

Component table

Signal: DAD2 A, Sig=220,4 Ref=360,100

| Component | 'D Sampling range [min] | Ret.Time 'D [min] | Area     | Area%  | ee = 72.8% |
|-----------|-------------------------|-------------------|----------|--------|------------|
| 1         | 5.83 - 5.87             | 7.467             | 1864.184 | 86.378 |            |
| 2         | 5.83 - 5.87             | 8.708             | 293.978  | 13.622 |            |

Determination of the ee of **17** before recrystallization

Cut# : 1

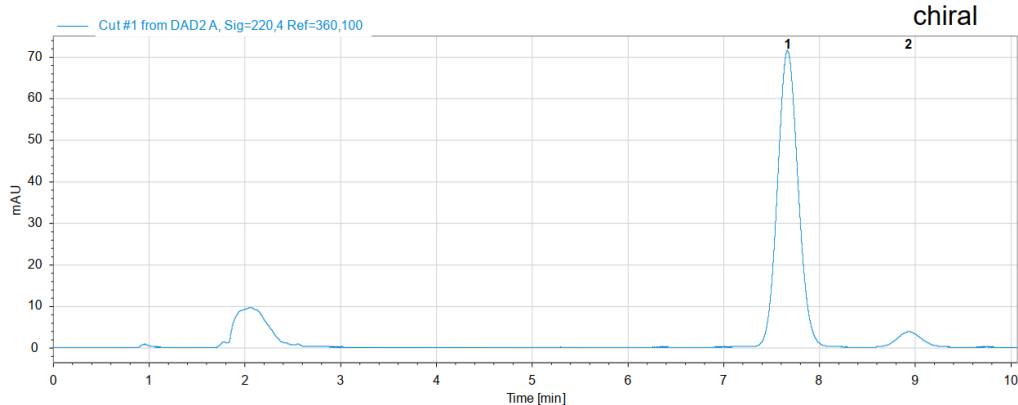

Signal: DAD2 A, Sig=220,4 Ref=360,100

| Compound | Cut | Ret.Time | Area                        | Width | Height | Symmetry |
|----------|-----|----------|-----------------------------|-------|--------|----------|
| 1        | 1   | 7.670    | 1061.059<br><b>1061.059</b> | 0.226 | 71.300 | 0.905    |
| 2        | 1   | 8.933    | 64.634<br><b>64.634</b>     | 0.208 | 3.656  | 0.865    |

Component table

Signal: DAD2 A, Sig=220,4 Ref=360,100

| Component | 'D Sampling range [min] | Ret.Time 'D [min] | Area     | Area%  | ee = 88.5%    |
|-----------|-------------------------|-------------------|----------|--------|---------------|
| 1         | 5.94 - 5.98             | 7.670             | 1061.059 | 94.258 | 1. enantiomer |
| 2         | 5.94 - 5.98             | 8.933             | 64.634   | 5.742  | 2. enantiomer |

Determination of the ee of **17** after recrystallization

### Cut# : 1

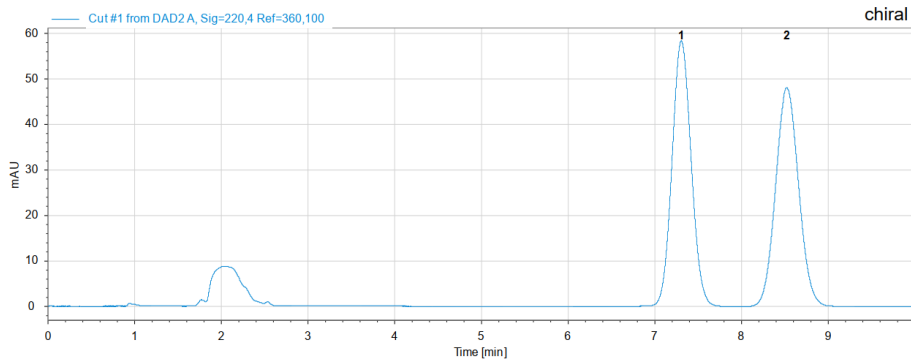

Signal: DAD2 A, Sig=220,4 Ref=360,100

| Compound | Cut | Ret.Time | Area                      | Width | Height | Symmetry |
|----------|-----|----------|---------------------------|-------|--------|----------|
| 1        | 1   | 7.310    | 891.810<br><b>891.810</b> | 0.226 | 58.370 | 0.905    |
| 2        | 1   | 8.528    | 891.110<br><b>891.110</b> | 0.253 | 48.112 | 0.931    |

### Component table

Signal: DAD2 A, Sig=220,4 Ref=360,100

| Component | <sup>1</sup> D Sampling range [min] | Ret.Time <sup>2</sup> D [min] | Area    | Area%  |                |
|-----------|-------------------------------------|-------------------------------|---------|--------|----------------|
| 1         | 5.89 - 5.93                         | 7.310                         | 891.810 | 50.020 | 1st enantiomer |
| 2         | 5.89 - 5.93                         | 8.528                         | 891.110 | 49.980 | 2nd enantiomer |

Separation of enantiomers of *rac*-17

## Representative Procedure B

### ***N*-((3*S*,4*S*)-4-Hydroxy-1-phenylhept-6-en-3-yl)-4-methyl-benzenesulfonamide (19).**

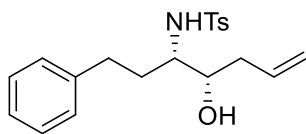

Bis(cyclooctadiene)nickel(0) (8.0 mg, 0.029 mmol, 10 mol%), phosphoramidite **L1** (19 mg, 0.029 mmol, 10 mol%) and THF (0.60 mL) were added to a flame-dried Schlenk flask under argon. Dienol ether **1** (R = TIPS) (0.23 mL, 0.87 mmol) and triethylborane (1.0 M in THF, 0.44 mL, 0.44 mmol) were added. Next, dihydrocinnamaldehyde N-tosylimine (**S11**) (75 mg, 0.29 mmol) and distilled and degassed water (5.2  $\mu$ L, 0.29 mmol) were added, the flask was sealed under argon, and the mixture was stirred at room temperature overnight. The reaction was quenched with sat. NaHCO<sub>3</sub> solution (3.0 mL) and stirring was continued for 10 min. The mixture was diluted with methyl *tert*-butyl ether (3.0 mL) and the aqueous layer was extracted with methyl *tert*-butyl ether (3  $\times$  5 mL). The combined organic layers were dried over anhydrous Na<sub>2</sub>SO<sub>4</sub>, filtered and concentrated under reduced pressure to give a pale yellow oil. The residue was dissolved in THF (1 mL) and tetrabutylammonium fluoride (1 M in THF, 0.87 mL, 0.87 mmol) was added. After stirring for 1 h at room temperature, distilled water (2.0 mL) was added and the aqueous phase was extracted by methyl *tert*-butyl ether (3  $\times$  5 mL). The combined organic layers were dried over Na<sub>2</sub>SO<sub>4</sub>, filtered and concentrated under reduced pressure to give a yellow oil. Purification by flash chromatography (SiO<sub>2</sub>; hexane/methyl *tert*-butyl ether, 5:1 to 3:2) afforded the title compound as a pale yellow oil (77 mg, 74%, >20:1 dr, 81% ee).  $[\alpha]_D^{20} = -6.5$  ( $c = 0.60$ , CHCl<sub>3</sub>); <sup>1</sup>H NMR (400 MHz, CDCl<sub>3</sub>)  $\delta$  7.76 – 7.71 (m, 2H), 7.35 – 7.27 (m, 2H), 7.24 – 7.20 (m, 2H), 7.20 – 7.14 (m, 1H), 7.08 – 6.96 (m, 2H), 5.72 (dddd,  $J = 17.1, 10.2, 8.2, 6.1$  Hz, 1H), 5.13 (ddt,  $J = 10.3, 2.0, 1.0$  Hz, 1H), 5.08 (app. dq,  $J = 16.9, 1.5$  Hz, 1H), 4.75 (d,  $J = 9.0$  Hz, 1H), 3.70 – 3.64 (m, 1H), 3.28 (dtd,  $J = 9.3, 6.8, 2.6$  Hz, 1H), 2.51 – 2.43 (m, 2H), 2.43 (s, 3H), 2.27 – 2.07 (m, 2H), 1.88 (ddt,  $J = 13.8, 8.8, 6.9$  Hz, 1H), 1.77 (br s, 1H), 1.68 – 1.57 (m, 1H); <sup>13</sup>C NMR (101 MHz, CDCl<sub>3</sub>)  $\delta$  143.5, 141.3, 138.5, 134.1, 129.8, 128.6, 128.4, 127.2, 126.2, 119.2, 71.0, 56.9, 38.9, 34.5, 32.1, 21.7; IR (ATR):  $\tilde{\nu} = 3493, 3275, 3064, 3026, 2926, 2866, 1641, 1599, 1495, 1430, 1325, 1289, 1217, 1154, 1091, 1062, 980, 917, 883, 814, 750, 700, 663$ ; HRMS (ESI<sup>+</sup>,  $m/z$ ) calculated for [C<sub>20</sub>H<sub>25</sub>NO<sub>3</sub>S+Na]<sup>+</sup> ([M+Na]<sup>+</sup>) 382.1447, found 382.1448.

The ee was determined by 2D HPLC analysis. Step 1: Purification: 50 mm Zorbax Eclipse Plus C18,  $\varnothing$  4.6 mm i. d., methanol/water gradient 50% to 80% over 5 min,  $v = 1.0$  mL/min,  $\lambda = 220$  nm,  $t(\text{major}) = 4.74$  min, 308 K.

### <sup>1</sup>D chromatogram(s)

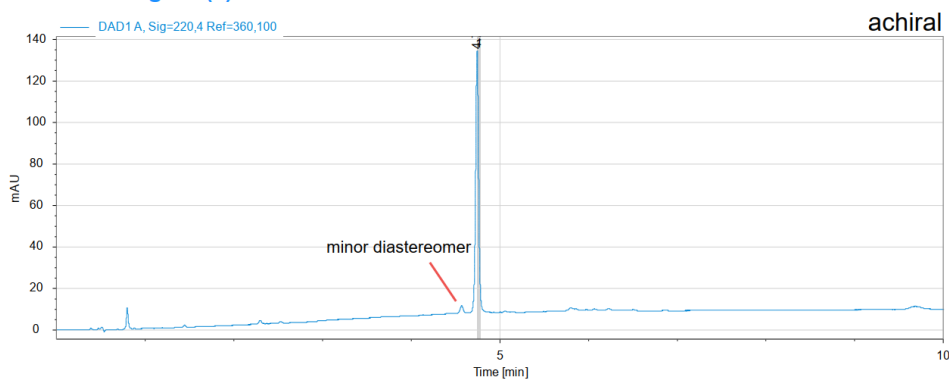

### Sampling table (<sup>1</sup>D)

| Cut group | Cut # | <sup>1</sup> D Cut start [min] | <sup>1</sup> D Ret. time [min] | <sup>1</sup> D Duration [min] | Trigger | <sup>2</sup> D Run start [min] |
|-----------|-------|--------------------------------|--------------------------------|-------------------------------|---------|--------------------------------|
|           | 1     | 4.74                           | 4.748                          | 0.04                          | Peak    | 4.79 major diastereomer        |

Separation of impurities on an achiral column

Step 2: Chiral resolution of the major diastereomer: Daicel 150 mm Chiralpak AS-3R, Ø 4.6 mm i. d., acetonitrile/water = 50:50,  $v = 1.0$  mL/min,  $\lambda = 220$  nm,  $t(\text{minor}) = 7.06$  min,  $t(\text{major}) = 9.86$  min.

### Cut# : 1

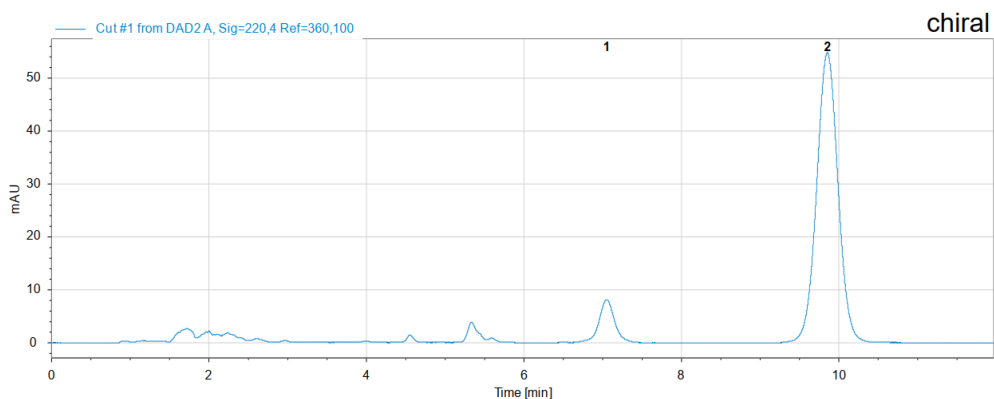

Signal: DAD2 A, Sig=220,4 Ref=360,100

| Compound | Cut | Ret.Time | Area     | Width | Height | Symmetry |                |
|----------|-----|----------|----------|-------|--------|----------|----------------|
| 1        | 1   | 7.056    | 110.603  | 0.162 | 8.083  | 0.962    | 1st enantiomer |
| 2        | 1   | 9.857    | 1031.690 | 0.274 | 54.757 | 0.979    | 2nd enantiomer |

**ee = 80.6 %**

### Component table

Signal: DAD2 A, Sig=220,4 Ref=360,100

| Component | <sup>1</sup> D Sampling range [min] | Ret.Time <sup>2</sup> D [min] | Area     | Area%  |                |
|-----------|-------------------------------------|-------------------------------|----------|--------|----------------|
| 1         | 4.74 - 4.78                         | 7.056                         | 110.603  | 9.683  | 1st enantiomer |
| 2         | 4.74 - 4.78                         | 9.857                         | 1031.690 | 90.317 | 2nd enantiomer |

Determination of the ee of **19**

Cut# : 1

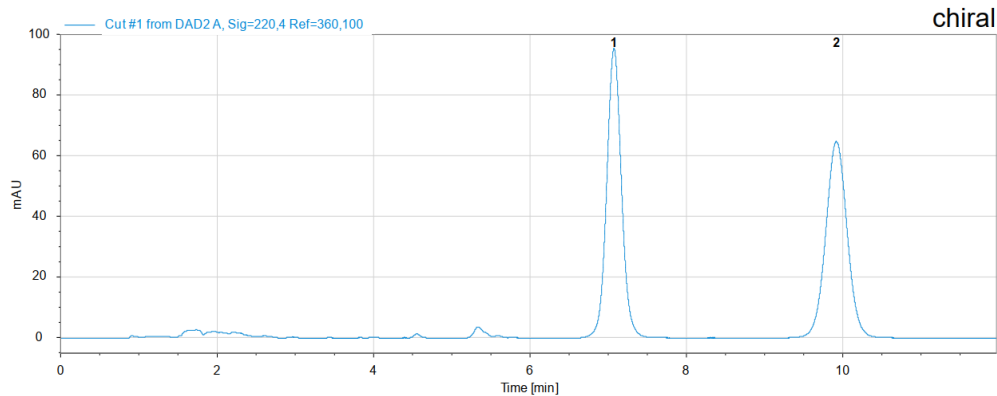

Signal: DAD2 A, Sig=220,4 Ref=360,100

| Compound | Cut | Ret.Time | Area                        | Width | Height | Symmetry |                |
|----------|-----|----------|-----------------------------|-------|--------|----------|----------------|
| 1        | 1   | 7.080    | 1247.914<br><b>1247.914</b> | 0.201 | 95.372 | 0.945    | 1st enantiomer |
| 2        | 1   | 9.922    | 1230.976<br><b>1230.976</b> | 0.276 | 64.817 | 0.956    | 2nd enantiomer |

### Component table

Signal: DAD2 A, Sig=220,4 Ref=360,100

| Component | <sup>1</sup> D Sampling range [min] | Ret.Time <sup>2</sup> D [min] | Area     | Area%  |                |
|-----------|-------------------------------------|-------------------------------|----------|--------|----------------|
| 1         | 4.74 - 4.78                         | 7.080                         | 1247.914 | 50.342 | 1st enantiomer |
| 2         | 4.74 - 4.78                         | 9.922                         | 1230.976 | 49.658 | 2nd enantiomer |

Separation of the enantiomers of *rac*-19

***N*-((3*S*,4*S*)-4-Hydroxyhept-6-en-3-yl)-4-methylbenzenesulfonamide (18).** Prepared

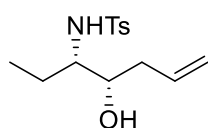

according to the representative procedure **B**. Purified by flash chromatography (SiO<sub>2</sub>; hexane/methyl *tert*-butyl ether, 5:1 to 3:2) to give the title compound as a yellow oil (65 mg, 79%, >20:1 dr, 83% ee).  $[\alpha]_D^{20} =$

$-20.0$  ( $c = 0.53$ , CHCl<sub>3</sub>); <sup>1</sup>H NMR (400 MHz, CDCl<sub>3</sub>)  $\delta$  7.78 – 7.73 (m, 2H), 7.32 – 7.27 (m, 2H), 5.75 (dddd,  $J = 17.1, 10.3, 8.2, 6.1$  Hz, 1H), 5.16 – 5.05 (m, 2H), 4.65 (d,  $J = 8.8$  Hz, 1H), 3.64 (app. dq,  $J = 7.3, 3.4$  Hz, 1H), 3.15 (dtd,  $J = 9.6, 6.9, 2.8$  Hz, 1H), 2.42 (s, 3H), 2.26 – 2.08 (m, 2H), 1.75 (br s, 1H), 1.65 – 1.50 (m, 1H), 1.37 (ddd,  $J = 14.1, 7.6, 6.9$  Hz, 1H), 0.74 (t,  $J = 7.5$  Hz, 3H); <sup>13</sup>C NMR (101 MHz, CDCl<sub>3</sub>)  $\delta$  143.4, 138.7, 134.2, 129.8, 127.1, 119.0, 70.7, 58.9, 38.9, 25.8, 21.7, 10.4; IR (ATR):  $\tilde{\nu} = 3500, 3250, 2970, 2927, 2895, 1643, 1597, 1434, 1327, 1283, 1215, 1155, 1088, 1007, 991, 937, 916, 900, 869, 815, 755, 709, 653$ ; HRMS (ESI<sup>+</sup>,  $m/z$ ) calculated for [C<sub>14</sub>H<sub>21</sub>NO<sub>3</sub>S+Na]<sup>+</sup> ( $[M+Na]^+$ ) 306.1134, found 306.1134.

The ee was determined by 2D HPLC analysis. Step 1: Purification: 50 mm Phenyl Hexyl,  $\varnothing$  4.6 mm i. d., acetonitrile/water gradient 30% to 40% over 5 minutes,  $v = 1.0$  mL/min,  $\lambda = 220$  nm,  $t(\text{major}) = 4.26$  min, 308 K.

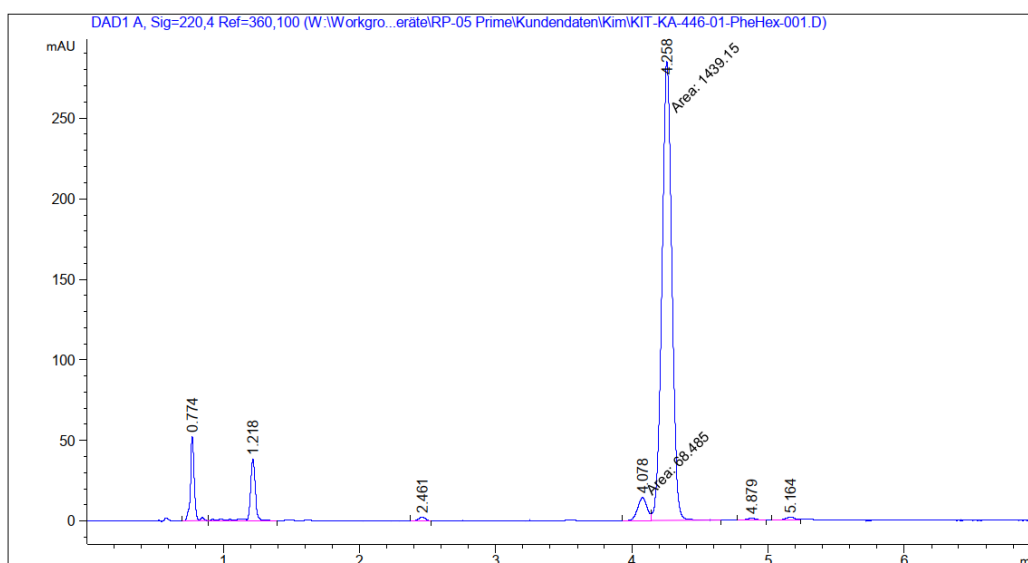

| Peak #   | RetTime [min] | Type | Width [min] | Area [mAU*s] | Height [mAU] | Area %                     |
|----------|---------------|------|-------------|--------------|--------------|----------------------------|
| 1        | 0.774         | BV R | 0.0297      | 103.55791    | 52.09127     | 5.9746                     |
| 2        | 1.218         | VB R | 0.0388      | 98.81053     | 38.02311     | 5.7007                     |
| 3        | 2.461         | BB   | 0.0495      | 7.59845      | 2.21849      | 0.4384                     |
| 4        | 4.078         | MF   | 0.0801      | 68.48502     | 14.25222     | 3.9511 minor diastereomer  |
| 5        | 4.258         | FM   | 0.0843      | 1439.14685   | 284.65808    | 83.0291 major diastereomer |
| 6        | 4.879         | BB   | 0.0725      | 5.83014      | 1.15332      | 0.3364                     |
| 7        | 5.164         | BV   | 0.0847      | 9.87532      | 1.79466      | 0.5697                     |
| Totals : |               |      |             | 1733.30423   | 394.19115    |                            |

Separation of impurities on an achiral column

Step 2: Chiral resolution of the major diastereomer: Daicel 150 mm Chiralpak OJ-3R,  $\varnothing$  4.6 mm i. d., methanol/water = 55:45,  $v = 1.0$  mL/min,  $\lambda = 220$  nm,  $t(\text{major}) = 17.59$  min,  $t(\text{minor}) = 21.25$  min.

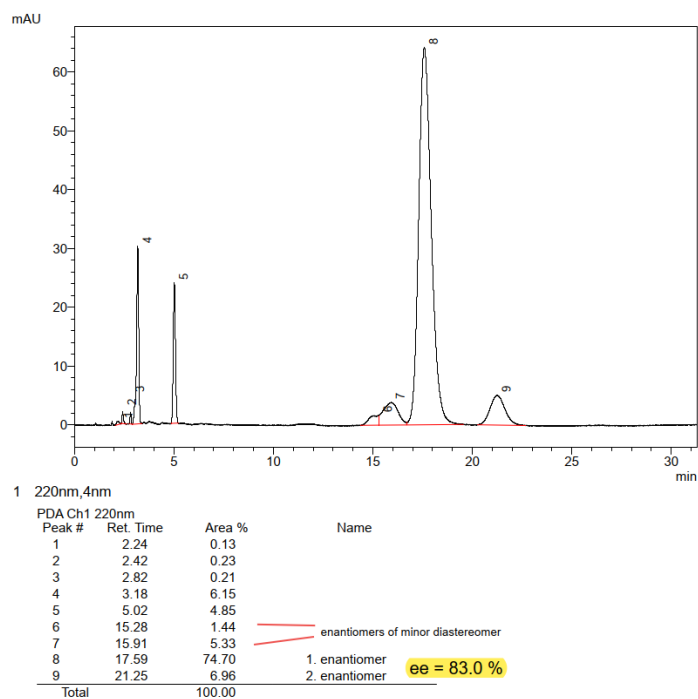

### Determination of the ee of **18**

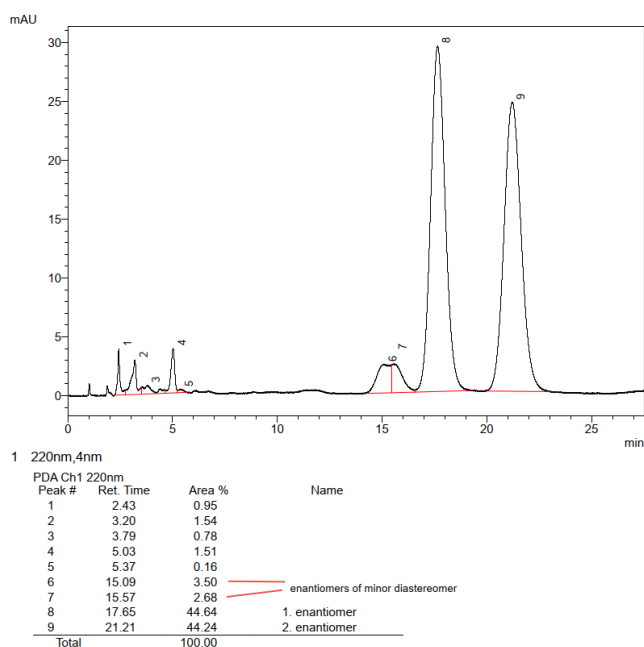

### Separation of the enantiomers of *rac*-**18**

***N*-((4*S*,5*S*)-4-Hydroxyundec-1-en-5-yl)-4-methylbenzenesulfonamide (20).** Prepared

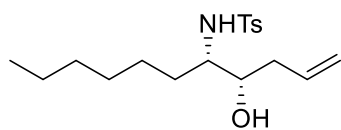

according to the representative procedure **B**. Purified by flash chromatography (SiO<sub>2</sub>; hexane/methyl *tert*-butyl ether, 15:1 to 3:1) to give the title compound as a yellow oil (79 mg, 80%, >20:1

dr, 82% ee).  $[\alpha]_D^{20} = -19.8$  ( $c = 0.59$ , CHCl<sub>3</sub>); <sup>1</sup>H NMR (400 MHz,

CDCl<sub>3</sub>)  $\delta$  7.78 – 7.73 (m, 2H), 7.32 – 7.27 (m, 2H), 5.76 (dddd,  $J = 16.3, 10.3, 8.2, 6.0$  Hz, 1H), 5.16 – 5.07 (m, 2H), 4.60 (d,  $J = 8.9$  Hz, 1H), 3.62 (ddd,  $J = 8.7, 4.3, 2.7$  Hz, 1H), 3.21 (dtd,  $J = 9.5, 6.9, 2.7$  Hz, 1H), 2.42 (s, 3H), 2.29 – 2.10 (m, 2H), 1.50 (dq,  $J = 14.4, 7.2$  Hz, 1H), 1.36 – 1.23 (m, 1H), 1.23 – 1.12 (m, 2H), 1.11 – 1.01 (m, 6H), 0.84 (t,  $J = 7.2$  Hz, 3H); <sup>13</sup>C NMR (101 MHz, CDCl<sub>3</sub>)  $\delta$  143.4, 138.6, 134.3, 129.7, 127.2, 119.0, 71.2, 57.5, 38.8, 32.8, 31.7, 29.1, 25.8, 22.6, 21.6, 14.2; IR (ATR):  $\tilde{\nu} = 3493, 3275, 2953, 2926, 2857, 1641, 1598, 1495, 1428, 1323, 1289, 1215, 1155, 1093, 1065, 989, 959, 913, 814, 755, 707, 663$ ; HRMS (ESI<sup>+</sup>,  $m/z$ ) calculated for [C<sub>18</sub>H<sub>29</sub>NO<sub>3</sub>S+Na]<sup>+</sup> ([M+Na]<sup>+</sup>) 362.1760, found 362.1762.

The ee was determined by 2D HPLC analysis. Step 1: Purification: 50 mm Phenyl Hexyl,  $\varnothing$  4.6 mm i. d., acetonitrile/water gradient 30% to 50% over 5 minutes,  $v = 1.0$  mL/min,  $\lambda = 220$  nm,  $t(\text{major}) = 7.37$  min, 308 K.

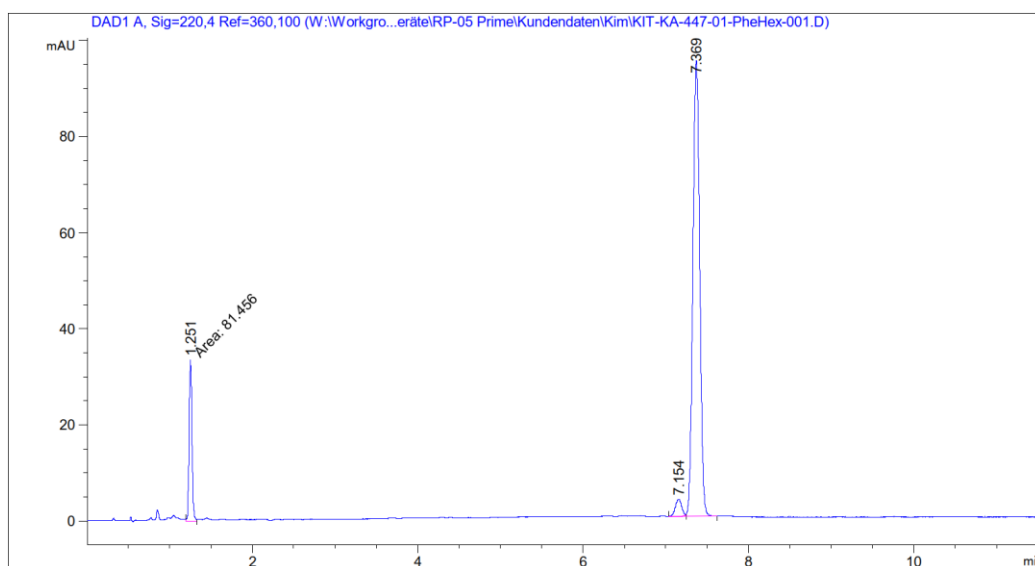

| Peak #   | RetTime [min] | Type | Width [min] | Area [mAU*s] | Height [mAU] | Area %                     |
|----------|---------------|------|-------------|--------------|--------------|----------------------------|
| 1        | 1.251         | MM   | 0.0404      | 81.45597     | 33.63570     | 12.6625                    |
| 2        | 7.154         | BV E | 0.0687      | 18.43841     | 3.51350      | 2.8663 minor diastereomer  |
| 3        | 7.369         | VB R | 0.0904      | 543.38928    | 94.77242     | 84.4712 major diastereomer |
| Totals : |               |      |             | 643.28366    | 131.92161    |                            |

Separation of impurities on an achiral column



Step 2: Chiral resolution of the major diastereomer: Daicel 150 mm Chiralpak IC-3,  $\varnothing$  4.6 mm i. d., acetonitrile/water = 60:40,  $v = 1.0$  mL/min,  $\lambda = 220$  nm,  $t(\text{minor}) = 4.62$  min,  $t(\text{major}) = 5.10$  min.

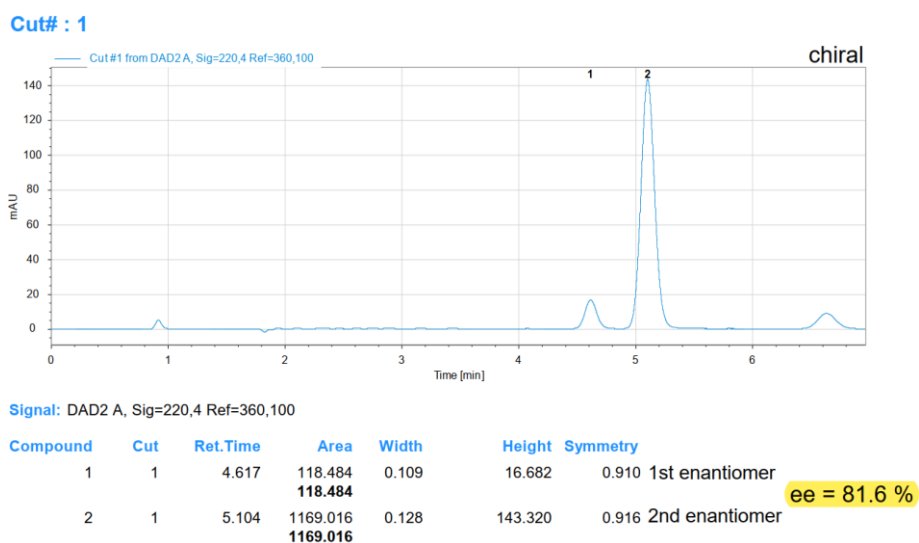

#### Component table

Signal: DAD2 A, Sig=220,4 Ref=360,100

| Component | <sup>1</sup> D Sampling range [min] | Ret.Time <sup>2</sup> D [min] | Area     | Area%  |                |
|-----------|-------------------------------------|-------------------------------|----------|--------|----------------|
| 1         | 7.01 - 7.05                         | 4.617                         | 118.484  | 9.203  | 1st enantiomer |
| 2         | 7.01 - 7.05                         | 5.104                         | 1169.016 | 90.797 | 2nd enantiomer |

### Determination of the ee of 20

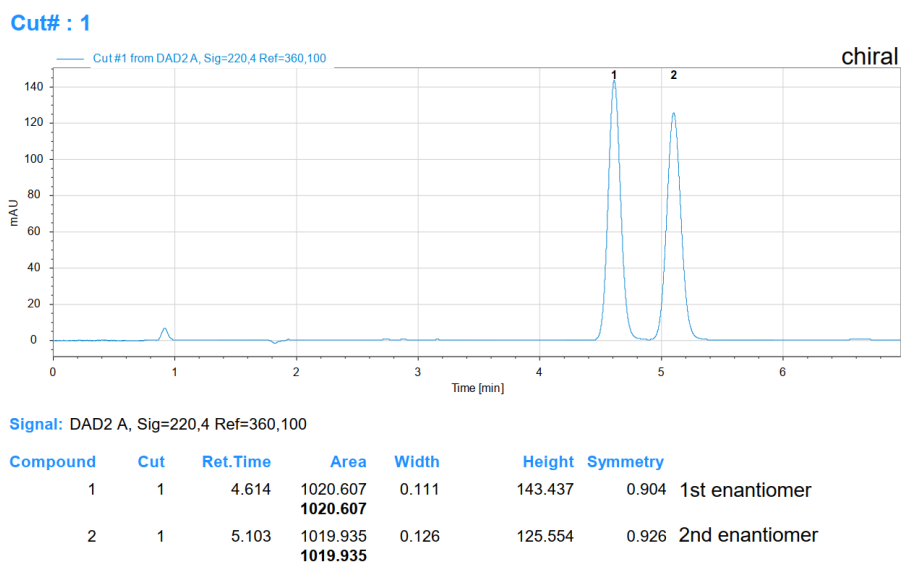

#### Component table

Signal: DAD2 A, Sig=220,4 Ref=360,100

| Component | <sup>1</sup> D Sampling range [min] | Ret.Time <sup>2</sup> D [min] | Area     | Area%  |                |
|-----------|-------------------------------------|-------------------------------|----------|--------|----------------|
| 1         | 7.01 - 7.05                         | 4.614                         | 1020.607 | 50.016 | 1st enantiomer |
| 2         | 7.01 - 7.05                         | 5.103                         | 1019.935 | 49.984 | 2nd enantiomer |

### Separation of the enantiomers of *rac*-20

## ***N*-((3*S*,4*S*)-4-Hydroxy-2-methylhept-6-en-3-yl)-4-methylbenzenesulfonamide (21).**

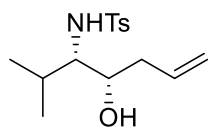

Prepared according to the representative procedure **B**. Purified by flash chromatography (SiO<sub>2</sub>; hexane/methyl *tert*-butyl ether, 10:1 to 2:1) to give the title compound as a white solid (70 mg, 81%, >20:1 dr, 86% ee).  $[\alpha]_D^{20} = -21.9$  ( $c = 0.48$ , CHCl<sub>3</sub>); <sup>1</sup>H NMR (400 MHz, CDCl<sub>3</sub>)  $\delta$  7.77 – 7.74 (m, 2H), 7.31 – 7.27 (m, 2H), 5.73 (dddd,  $J = 17.1, 10.2, 8.2, 6.0$  Hz, 1H), 5.12 (ddt,  $J = 10.2, 2.0, 1.0$  Hz, 1H), 5.08 – 5.01 (m, 1H), 4.87 (d,  $J = 9.1$  Hz, 1H), 3.73 (ddd,  $J = 8.7, 4.3, 2.4$  Hz, 1H), 3.06 (ddd,  $J = 8.9, 6.1, 2.4$  Hz, 1H), 2.42 (s, 3H), 2.14 (app. dddt,  $J = 14.1, 5.9, 4.6, 1.4$  Hz, 1H), 2.08 – 1.99 (m, 1H), 1.83 – 1.75 (m, 2H), 0.82 (d,  $J = 6.7$  Hz, 3H), 0.78 (d,  $J = 6.9$  Hz, 3H); <sup>13</sup>C NMR (101 MHz, CDCl<sub>3</sub>)  $\delta$  143.3, 139.0, 134.2, 129.7, 127.1, 119.1, 69.5, 62.4, 40.0, 31.4, 21.7, 19.6, 19.0; IR (ATR):  $\tilde{\nu} = 3531, 3498, 3316, 3219, 2969, 2901, 2874, 1598, 1497, 1437, 1326, 1317, 1230, 1157, 1145, 1094, 1048, 1003, 969, 868, 816, 685$ ; HRMS (ESI<sup>+</sup>,  $m/z$ ) calculated for [C<sub>15</sub>H<sub>23</sub>NO<sub>3</sub>S+Na]<sup>+</sup> ([M+Na]<sup>+</sup>) 320.1291, found 320.1290.

41 mg of product were recrystallized from methyl *tert*-butyl ether/*n*-hexane to give a sample with >99% ee (23 mg).

The ee was determined by 2D HPLC analysis. Step 1: Purification: 50 mm Eclipse PAH,  $\varnothing$  4.6 mm i. d., methanol/water gradient 40% to 60% over 5 min,  $v = 1.0$  mL/min,  $\lambda = 220$  nm,  $t(\text{major}) = 5.71$  min, 308 K.

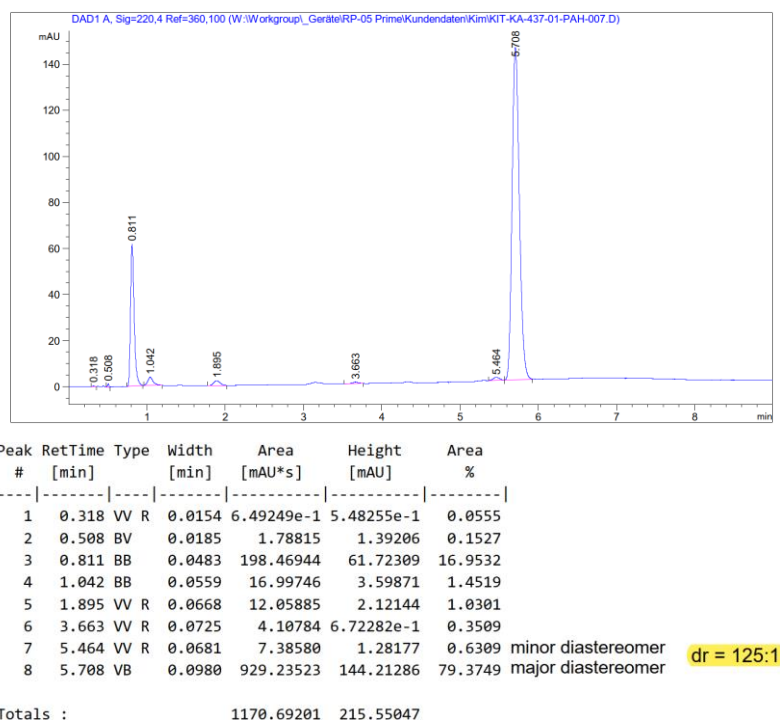

Separation of impurities on an achiral column

Step 2: Chiral resolution of the major diastereomer: Daicel 150 mm Chiralpak OJ-3R,  $\varnothing$  4.6 mm i. d., methanol/water = 65:35,  $v = 1.0$  mL/min,  $\lambda = 220$  nm,  $t(\text{major}) = 8.08$  min,  $t(\text{minor}) = 11.21$  min.

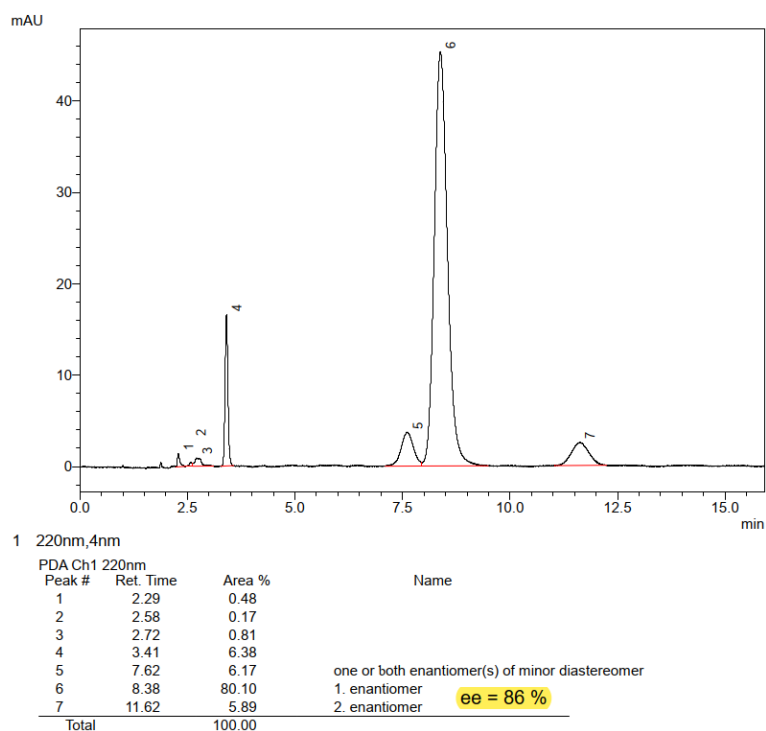

### Determination of the ee of **21** before recrystallization

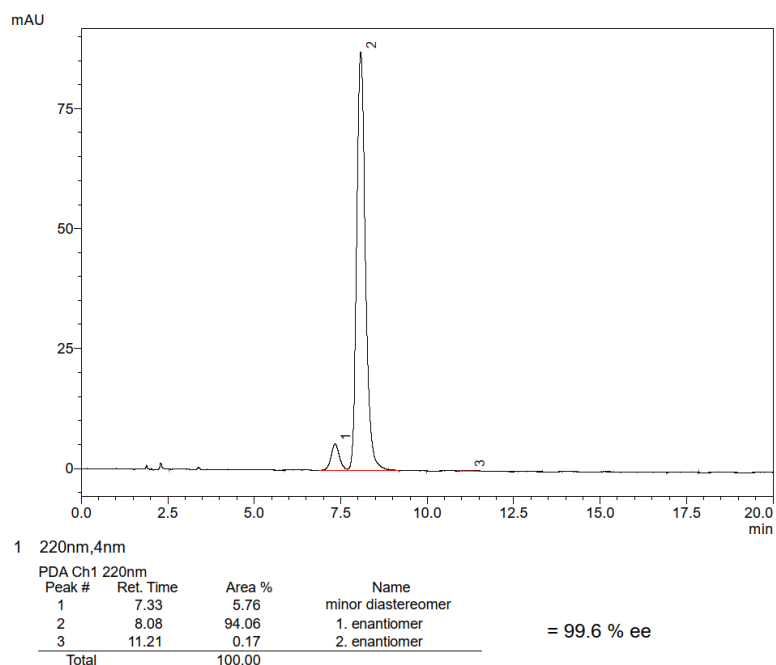

### Determination of the ee of **21** after recrystallization

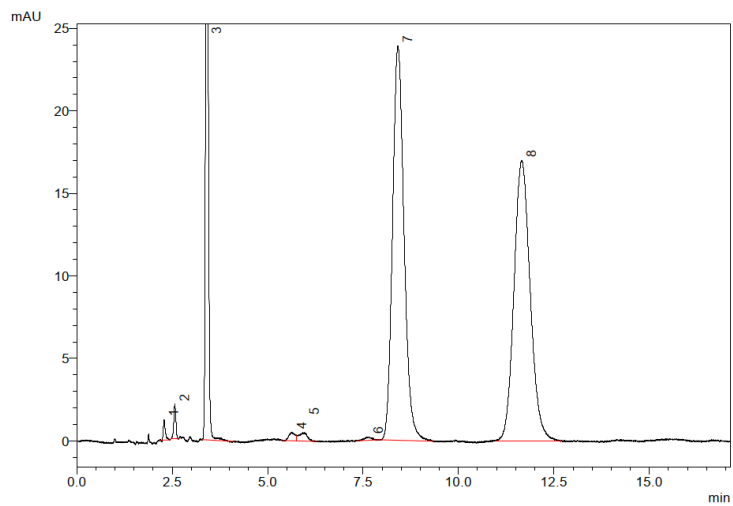

1 220nm,4nm

PDA Ch1 220nm

| Peak # | Ret. Time | Area % | Name                                            |
|--------|-----------|--------|-------------------------------------------------|
| 1      | 2.29      | 0.37   |                                                 |
| 2      | 2.57      | 0.65   |                                                 |
| 3      | 3.41      | 17.47  |                                                 |
| 4      | 5.64      | 0.45   |                                                 |
| 5      | 5.97      | 0.62   |                                                 |
| 6      | 7.65      | 0.21   | one or both enantiomer(s) of minor diastereomer |
| 7      | 8.41      | 40.12  | 1. enantiomer                                   |
| 8      | 11.66     | 40.11  | 2. enantiomer                                   |
| Total  |           | 100.00 |                                                 |

## Separation of the enantiomers of *rac*-21

***N*-((3*S*,4*S*)-4-Hydroxy-2,2-dimethylhept-6-en-3-yl)-4-methylbenzenesulfonamide (22).**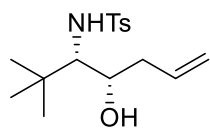

Prepared according to the representative procedure **B**. Purified by flash chromatography (SiO<sub>2</sub>; hexane/methyl *tert*-butyl ether, 10:1 to 2:1) to give the title compound as a pale yellow solid (46 mg, 51%, >20:1 dr, 81% ee).

$[\alpha]_D^{20} = -32.3$  ( $c = 0.48$ , CHCl<sub>3</sub>); <sup>1</sup>H NMR (400 MHz, CDCl<sub>3</sub>)  $\delta$  7.79 – 7.73 (m, 2H), 7.30 – 7.27 (m, 2H), 5.69 (dddd,  $J = 17.1, 10.2, 8.5, 5.8$  Hz, 1H), 5.16 – 5.09 (m, 2H), 5.06 – 4.96 (m, 1H), 3.85 (ddd,  $J = 9.4, 4.6, 0.9$  Hz, 1H), 3.05 (dd,  $J = 9.1, 0.9$  Hz, 1H), 2.42 (s, 3H), 2.09 (app. dddt,  $J = 13.3, 5.9, 4.6, 1.5$  Hz, 1H), 1.92 (app. dddt,  $J = 13.9, 9.4, 8.4, 1.0$  Hz, 1H), 0.84 (s, 9H); <sup>13</sup>C NMR (101 MHz, CDCl<sub>3</sub>)  $\delta$  143.1, 139.5, 134.2, 129.6, 127.1, 119.6, 67.7, 64.7, 41.3, 35.5, 27.3, 21.6; IR (ATR):  $\tilde{\nu} = 3510, 3329, 2962, 2926, 2870, 1598, 1418, 1369, 1330, 1289, 1236, 1204, 1148, 1090, 1072, 1031, 1019, 1008, 962, 915, 816, 707, 680, 653$ ; HRMS (ESI<sup>+</sup>,  $m/z$ ) calculated for [C<sub>16</sub>H<sub>25</sub>NO<sub>3</sub>S+Na]<sup>+</sup> ([M+Na]<sup>+</sup>) 334.1447, found 334.1449.

35 mg of product were recrystallized from methyl *tert*-butyl ether/*n*-hexane to give a sample of 93% ee (25 mg).

The ee was determined by HPLC analysis: Chiralpak 150 mm IB-N-3,  $\varnothing$  4.6 mm i. d., *n*-heptane/*i*-propanol = 90:10,  $v = 1.0$  mL/min,  $\lambda = 230$  nm,  $t(\text{minor}) = 4.18$  min,  $t(\text{major}) = 7.41$  min.

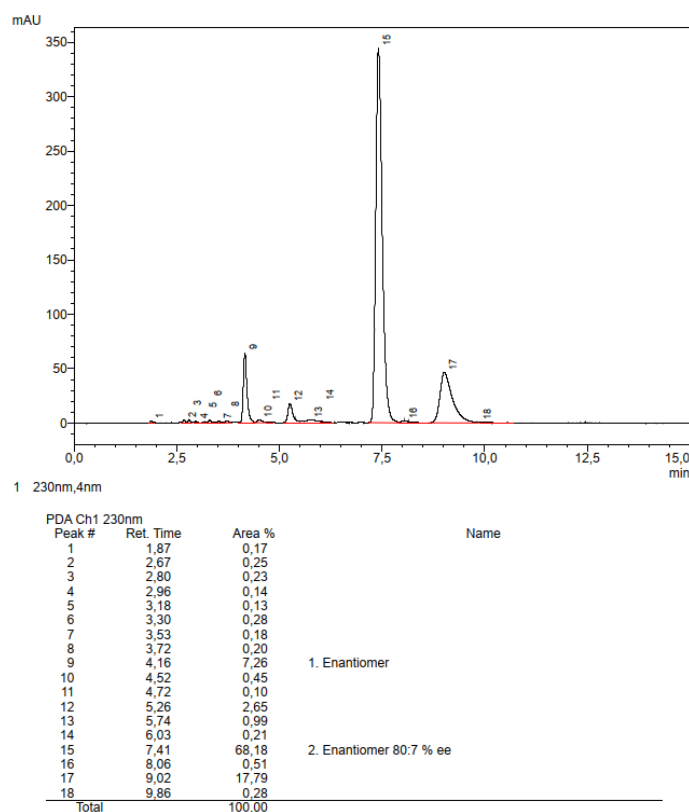

Determination of the ee of **22** before recrystallization

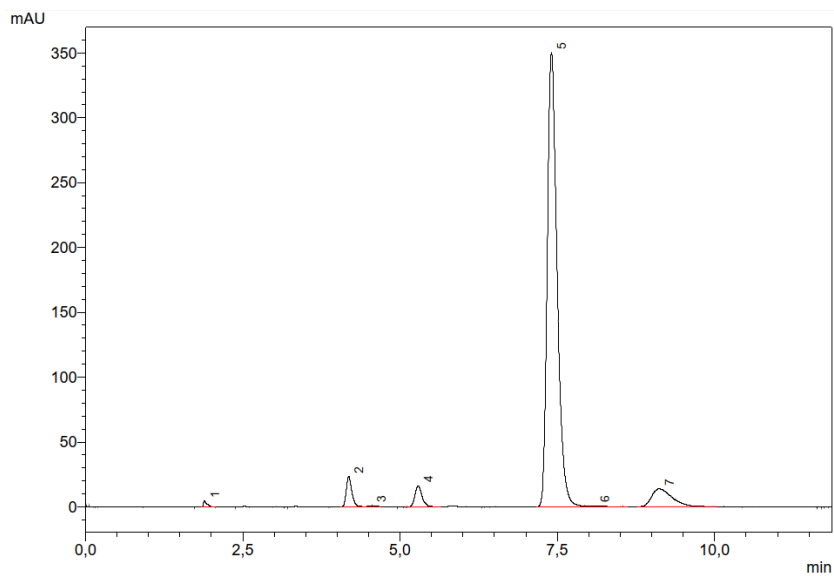

1 230nm,4nm

| Peak # | Ret. Time | Area % | Name                    |
|--------|-----------|--------|-------------------------|
| 1      | 1,89      | 0,45   |                         |
| 2      | 4,18      | 3,29   | 1. Enantiomer           |
| 3      | 4,54      | 0,18   |                         |
| 4      | 5,29      | 2,90   |                         |
| 5      | 7,41      | 85,75  | 2. Enantiomer 92.6 % ee |
| 6      | 8,09      | 0,25   |                         |
| 7      | 9,12      | 7,18   |                         |
| Total  |           | 100,00 |                         |

### Determination of the ee of **22** after recrystallization

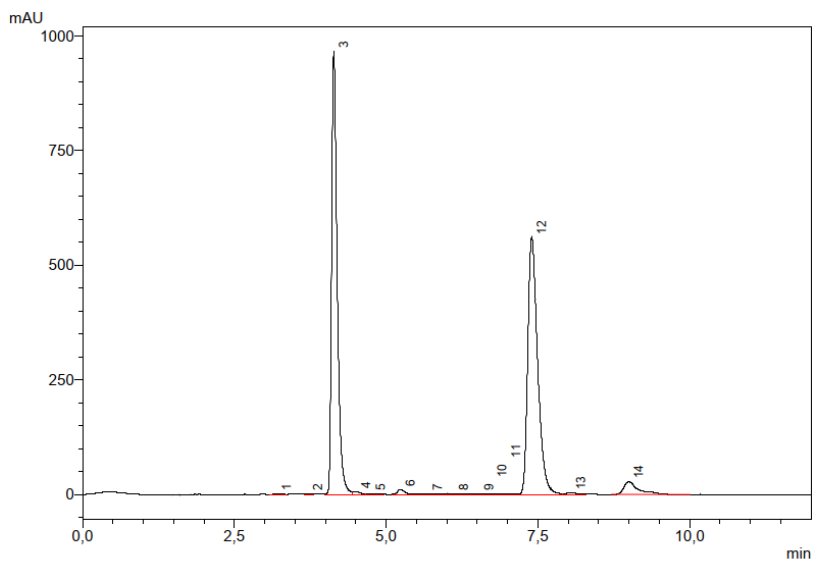

1 230nm,4nm

| Peak # | Ret. Time | Area % | Name          |
|--------|-----------|--------|---------------|
| 1      | 3,20      | 0,13   |               |
| 2      | 3,71      | 0,10   |               |
| 3      | 4,14      | 46,17  | 1. Enantiomer |
| 4      | 4,51      | 0,46   |               |
| 5      | 4,75      | 0,21   |               |
| 6      | 5,24      | 0,84   |               |
| 7      | 5,69      | 0,11   |               |
| 8      | 6,12      | 0,35   |               |
| 9      | 6,53      | 0,20   |               |
| 10     | 6,75      | 0,11   |               |
| 11     | 6,98      | 0,15   |               |
| 12     | 7,40      | 47,09  | 2. Enantiomer |
| 13     | 8,05      | 0,41   |               |
| 14     | 9,00      | 3,66   |               |
| Total  |           | 100,00 |               |

### Separation of the enantiomers of *rac*-**22**

***N*-((1*S*,2*S*)-1-Cyclohexyl-2-hydroxypent-4-en-1-yl)-4-methylbenzenesulfonamide (23).**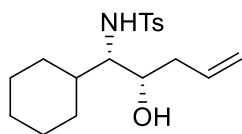

Prepared according to the representative procedure **B**. Purified by flash chromatography (SiO<sub>2</sub>; hexane/methyl *tert*-butyl ether, 10:1 to 2:1) to give the title compound as a pale yellow solid (66 mg, 67%, >20:1 dr, 82% ee).

$[\alpha]_D^{20} = -1.0$  ( $c = 0.51$ , CHCl<sub>3</sub>); <sup>1</sup>H NMR (400 MHz, CDCl<sub>3</sub>)  $\delta$  7.79 – 7.72 (m, 2H), 7.30 – 7.27 (m, 2H), 5.70 (dddd,  $J = 17.1, 10.2, 8.1, 6.0$  Hz, 1H), 5.11 (ddt,  $J = 10.2, 2.0, 1.0$  Hz, 1H), 5.05 – 4.98 (m, 1H), 4.86 (d,  $J = 9.1$  Hz, 1H), 3.75 (ddd,  $J = 8.7, 4.5, 2.2$  Hz, 1H), 3.07 (ddd,  $J = 8.9, 6.4, 2.2$  Hz, 1H), 2.42 (s, 3H), 2.09 (app. dddt,  $J = 14.1, 6.0, 4.5, 1.4$  Hz, 1H), 2.05 – 1.95 (m, 1H), 1.72 – 1.55 (m, 6H), 1.43 (tdt,  $J = 11.9, 6.2, 3.2$  Hz, 1H), 1.16 – 1.00 (m, 3H), 1.02 – 0.76 (m, 2H); <sup>13</sup>C NMR (101 MHz, CDCl<sub>3</sub>)  $\delta$  143.2, 139.1, 134.2, 129.6, 127.1, 119.0, 69.2, 61.9, 41.2, 39.9, 30.0, 29.5, 26.4 (2C), 26.3, 21.6; IR (ATR):  $\tilde{\nu} = 3531, 3293, 2918, 2850, 1433, 1324, 1283, 1157, 1094, 1071, 1052, 1039, 996, 969, 908, 864, 813, 712$ ; HRMS (ESI<sup>+</sup>,  $m/z$ ) calculated for [C<sub>18</sub>H<sub>27</sub>NO<sub>3</sub>S+Na]<sup>+</sup> ([M+Na]<sup>+</sup>) 360.1604, found 360.1604.

32 mg of product were recrystallized from methyl *tert*-butyl ether/*n*-hexane to give a sample of 88% ee (21 mg, 66% yield).

The ee was determined by HPLC analysis: Chiralpak 150 mm IB-N-3,  $\varnothing$  4.6 mm i. d., *n*-heptane/*i*-propanol = 95:5,  $v = 1.0$  mL/min,  $\lambda = 230$  nm,  $t(\text{minor}) = 8.11$  min,  $t(\text{major}) = 10.43$  min.

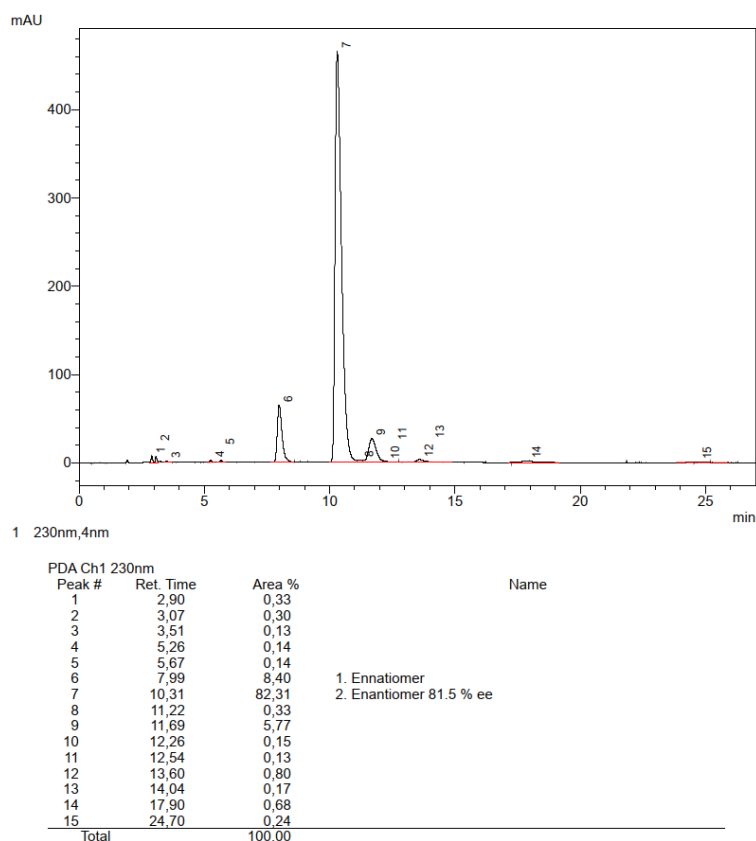

Determination of the ee of **23** before recrystallization

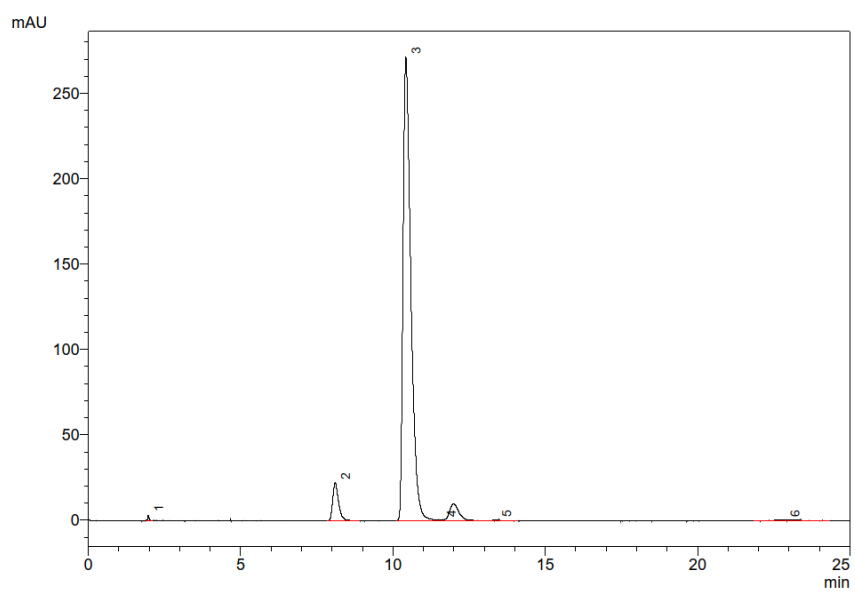

1 230nm,4nm

| Peak # | Ret. Time | Area % | Name                    |
|--------|-----------|--------|-------------------------|
| 1      | 1,97      | 0,20   |                         |
| 2      | 8,11      | 5,51   | 1. Enantiomer           |
| 3      | 10,43     | 89,37  | 2. Enantiomer 88.4 % ee |
| 4      | 11,58     | 4,17   |                         |
| 5      | 13,40     | 0,18   |                         |
| 6      | 22,86     | 0,57   |                         |
| Total  |           | 100,00 |                         |

### Determination of the ee of **23** after recrystallization

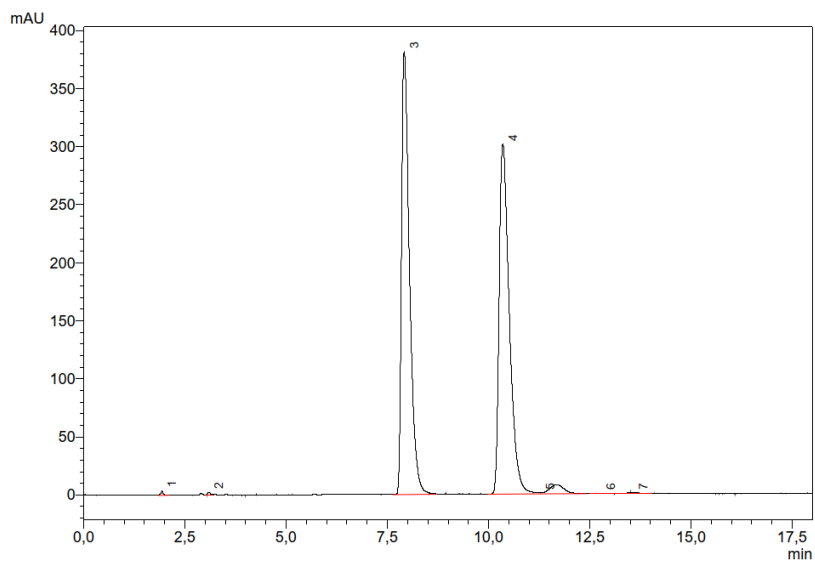

1 230nm,4nm

| Peak # | Ret. Time | Area % | Name          |
|--------|-----------|--------|---------------|
| 1      | 1,93      | 0,14   |               |
| 2      | 3,09      | 0,13   |               |
| 3      | 7,92      | 48,55  | 1. Enantiomer |
| 4      | 10,35     | 48,96  | 2. Enantiomer |
| 5      | 11,28     | 1,87   |               |
| 6      | 12,77     | 0,10   |               |
| 7      | 13,57     | 0,25   |               |
| Total  |           | 100,00 |               |

### Separation of the enantiomers of *rac*-**23**



**Larger Scale Reaction. *N*-((4*S*,5*S*)-5-Hydroxy-2-methyloct-7-en-4-yl)-4-methylbenzene-sulfonamide (**28**).**

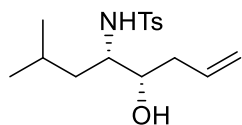

Bis(cyclooctadiene)nickel(0) (28 mg, 0.10 mmol, 10 mol%), phosphoramidite **L1** (64 mg, 0.10 mmol, 10 mol%) and THF (3.0 mL) were added to a flame-dried Schlenk flask under argon. Dienol ether **1** (R = TIPS) (0.80 mL, 3.0 mmol) and triethylborane (1.0 M in THF, 1.5 mL, 1.5 mmol) were added before the *N*-tosyl imine **27** (240 mg, 1.0 mmol) and distilled and degassed water (18  $\mu$ L, 1.0 mmol) were introduced. The flask was sealed under argon and the mixture was stirred at room temperature overnight. The reaction was quenched by sat. NaHCO<sub>3</sub> solution (5 mL) and stirring was continued for 1 h. The mixture was diluted with methyl *tert*-butyl ether (10 mL) and the aqueous phase was extracted with methyl *tert*-butyl ether (3  $\times$  10 mL). The combined organic layers were dried over anhydrous Na<sub>2</sub>SO<sub>4</sub>, filtered and concentrated under reduced pressure to give a pale yellow oil.

The residue was dissolved in THF (3 mL) and tetrabutylammonium fluoride (1 M in THF, 3.0 mL, 3.0 mmol) was added. After stirring for 1 h at room temperature, distilled water (5 mL) was added and the aqueous phase was extracted by methyl *tert*-butyl ether (3  $\times$  5 mL). The combined organic layers were dried over Na<sub>2</sub>SO<sub>4</sub>, filtered and concentrated under reduced pressure to give a yellow oil. Purification of the residue by flash chromatography (SiO<sub>2</sub>; toluene/methyl *tert*-butyl ether, 25:1 to 5:1) afforded the title compound as a yellow oil (278 mg, 89%, >20:1 dr, 75% ee).  $[\alpha]_D^{20} = -14.2$  ( $c = 0.50$ , CHCl<sub>3</sub>); <sup>1</sup>H NMR (400 MHz, CDCl<sub>3</sub>)  $\delta$  7.80 – 7.76 (m, 2H), 7.35 – 7.30 (m, 2H), 5.77 (dddd,  $J = 17.1, 10.3, 8.2, 6.1$  Hz, 1H), 5.19 – 5.08 (m, 2H), 4.57 (d,  $J = 9.0$  Hz, 1H), 3.62 (ddd,  $J = 8.4, 6.7, 4.1$  Hz, 1H), 3.33 (dtd,  $J = 9.4, 7.1, 2.4$  Hz, 1H), 2.45 (s, 3H), 2.27 (app. dddt,  $J = 13.4, 6.0, 4.7, 1.4$  Hz, 1H), 2.23 – 2.14 (m, 1H), 1.77 (d,  $J = 3.7$  Hz, 1H), 1.51 – 1.39 (m, 2H), 1.18 – 1.11 (m, 1H), 0.78 (d,  $J = 6.5$  Hz, 3H), 0.74 (d,  $J = 6.3$  Hz, 3H); <sup>13</sup>C NMR (101 MHz, CDCl<sub>3</sub>)  $\delta$  143.4, 138.6, 134.3, 129.7, 127.2, 119.0, 71.2, 55.4, 42.0, 38.9, 24.5, 22.6, 21.7; IR (ATR):  $\tilde{\nu} = 3525, 3279, 2957, 2926, 2870, 1429, 1326, 1305, 1289, 1158, 1094, 1057, 967, 913, 815, 669$ ; HRMS (ESI<sup>+</sup>,  $m/z$ ) calculated for [C<sub>16</sub>H<sub>25</sub>NO<sub>3</sub>S+Na]<sup>+</sup> ([M+Na]<sup>+</sup>) 334.1447, found 334.1449.

The ee was determined by HPLC analysis: Chiralpak 150 mm IG-3,  $\varnothing$  4.6 mm i. d., *n*-heptane/ethanol = 90:10,  $v = 1.0$  mL/min,  $\lambda = 230$  nm,  $t(\text{major}) = 21.05$  min,  $t(\text{minor}) = 27.76$  min.

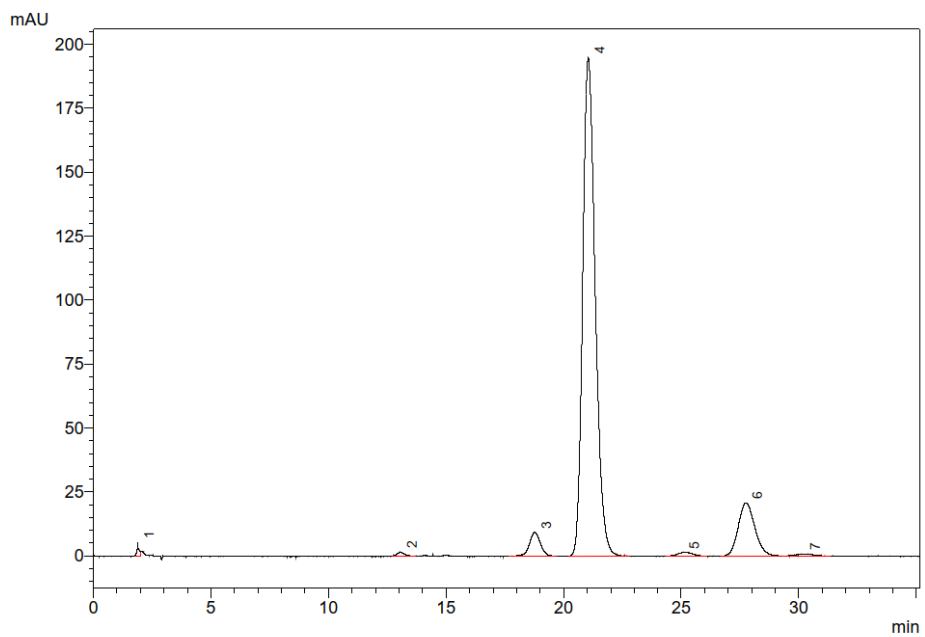

1 230nm,4nm

| PDA Ch1 230nm |           |        |                         |
|---------------|-----------|--------|-------------------------|
| Peak #        | Ret. Time | Area % | Name                    |
| 1             | 1,89      | 0,38   |                         |
| 2             | 13,07     | 0,48   |                         |
| 3             | 18,79     | 3,55   |                         |
| 4             | 21,05     | 82,49  | 1. Enantiomer 74.9 % ee |
| 5             | 25,08     | 0,75   |                         |
| 6             | 27,76     | 11,83  | 2. Enantiomer           |
| 7             | 30,21     | 0,51   |                         |
| Total         |           | 100,00 |                         |

### Determination of the ee of **28**

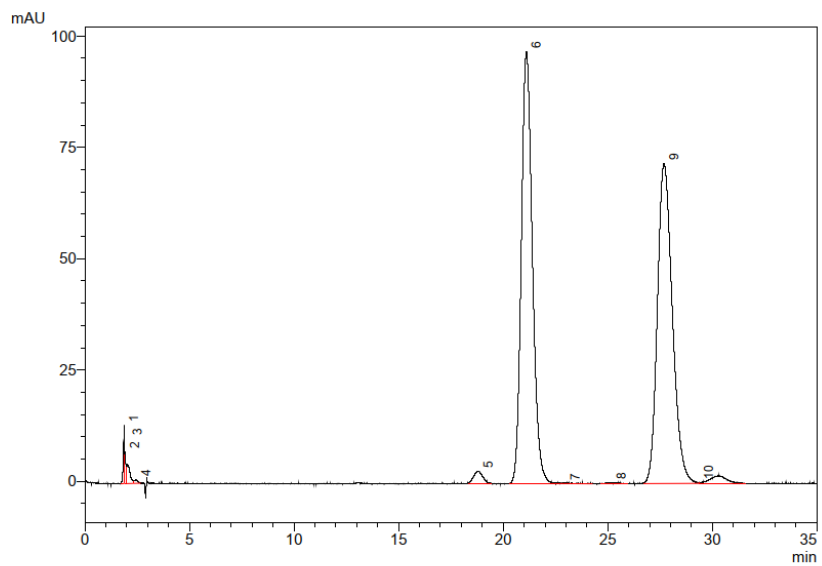

1 230nm,4nm

| PDA Ch1 230nm |           |        |               |
|---------------|-----------|--------|---------------|
| Peak #        | Ret. Time | Area % | Name          |
| 1             | 1,87      | 0,51   |               |
| 2             | 1,92      | 0,47   |               |
| 3             | 2,04      | 0,59   |               |
| 4             | 2,45      | 0,13   |               |
| 5             | 18,81     | 1,15   |               |
| 6             | 21,12     | 47,76  | 1. Enantiomer |
| 7             | 22,98     | 0,12   |               |
| 8             | 25,18     | 0,11   |               |
| 9             | 27,70     | 47,87  | 2. Enantiomer |
| 10            | 29,36     | 1,29   |               |
| Total         |           | 100,00 |               |

### Separation of enantiomers of **28**

## Representative Procedure C

### *N*-((1*S*,2*S*)-2-(Benzyloxy)-1-phenylpent-4-en-1-yl)-4-methylbenzenesulfonamide (**9e**).

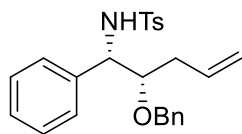

Bis(cyclooctadiene)nickel(0) (8.0 mg, 0.029 mmol, 10 mol%), phosphoramidite **L1** (19 mg, 0.029 mmol, 10 mol%) and THF (0.60 mL) were added to a flame-dried Schlenk flask under argon. (*E*)-((Buta-1,3-dien-1-yloxy)methyl)benzene (**1**, R = Bn) (0.15 mL, 0.87 mmol) and triethylborane (1.0 M in THF, 0.44 mL, 0.44 mmol) were added before 4-methyl-*N*-(phenyl(phenylsulfonyl)methyl)benzenesulfonamide (**7**, Ar = *p*-tolyl) (120 mg, 0.29 mmol),<sup>3</sup> distilled and degassed water (16  $\mu$ L, 0.87 mmol), and *N,N*-diisopropylethylamine (61  $\mu$ L, 0.35 mmol) were introduced. The flask was sealed under argon and the mixture was stirred at room temperature overnight. The reaction was quenched with sat. NaHCO<sub>3</sub> solution (3 mL) and stirring was continued for 10 min. The mixture was diluted with ethyl acetate (3 mL) and the aqueous phase was extracted with ethyl acetate (3  $\times$  5 mL). The combined organic layers were dried over anhydrous Na<sub>2</sub>SO<sub>4</sub>, filtered and concentrated under reduced pressure to give a pale yellow oil. Purification of the residue by flash chromatography (SiO<sub>2</sub>; hexane/methyl *tert*-butyl ether, 30:1 to 6:1) afforded the title compound as a white solid (103 mg, 84%, >20:1 dr, 89% ee).  $[\alpha]_D^{20} = +60.4$  ( $c = 0.50$ , CHCl<sub>3</sub>); <sup>1</sup>H NMR (400 MHz, CDCl<sub>3</sub>)  $\delta$  7.48 – 7.43 (m, 2H), 7.30 – 7.27 (m, 2H), 7.17 – 7.10 (m, 6H), 7.10 – 7.03 (m, 4H), 5.75 (ddt,  $J = 17.3, 10.3, 7.1$  Hz, 1H), 5.43 (d,  $J = 7.3$  Hz, 1H), 5.13 – 5.03 (m, 2H), 4.47 – 4.44 (m, 1H), 4.43 (d,  $J = 11.1$  Hz, 1H), 4.14 (d,  $J = 11.1$  Hz, 1H), 3.54 (ddd,  $J = 6.8, 5.7, 3.7$  Hz, 1H), 2.37 – 2.31 (m, 2H), 2.32 (s, 3H); <sup>13</sup>C NMR (101 MHz, CDCl<sub>3</sub>)  $\delta$  142.9, 139.3, 137.9, 137.6, 133.6, 129.3, 128.5, 128.3, 128.1, 128.0, 127.4, 127.3, 127.2, 118.8, 82.4, 72.5, 59.3, 35.5, 21.5; IR (ATR):  $\tilde{\nu} = 3292, 3064, 3029, 2939, 1641, 1600, 1497, 1455, 1431, 1320, 1290, 1161, 1086, 1059, 1025, 967, 923, 902, 832, 811, 776, 734, 694, 669$ ; HRMS (ESI<sup>+</sup>,  $m/z$ ) calculated for [C<sub>25</sub>H<sub>27</sub>NO<sub>3</sub>S+Na]<sup>+</sup> ([M+Na]<sup>+</sup>) 444.1604, found 444.1603.

Note: Internal alkene isomer **11e** (rr = 7.5:1, NMR) was not separable by flash chromatography.

The ee was determined by 2D HPLC analysis. Step 1: Purification: 50 mm Zorbax Eclipse Plus C18,  $\varnothing$  4.6 mm i. d., acetonitrile/water gradient 50% to 60% over 5 minutes,  $v = 1.0$  mL/min,  $\lambda = 220$  nm,  $t(\text{major}) = 9.14$  min, 308 K.

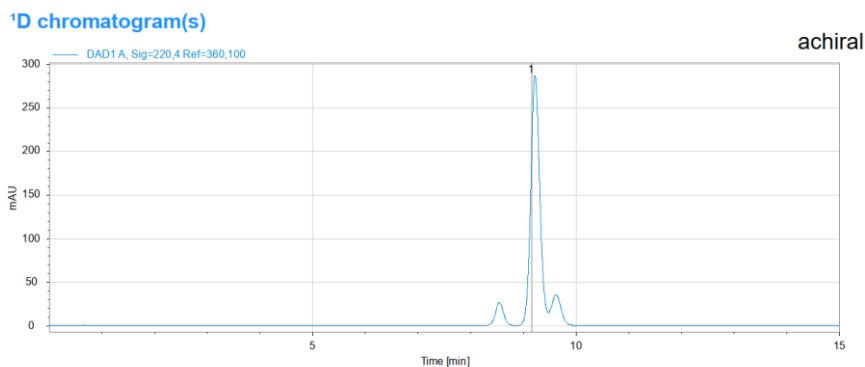

**Sampling table ('D)**

| Cut group | Cut # | 'D Cut start [min] | 'D Ret. time [min] | 'D Duration [min] | Trigger | 'D Run start [min] |
|-----------|-------|--------------------|--------------------|-------------------|---------|--------------------|
|           | 1     | 9.14               | ***                | 0.04              | Peak    | 9.19               |

**Separation of impurities on an achiral column**

Step 2: Chiral resolution of major diastereomer: Daicel 150 mm Chiralcel OZ-3R,  $\varnothing$  4.6 mm i. d., acetonitrile/water = 65:35,  $v = 1.0$  mL/min,  $\lambda = 220$  nm,  $t(\text{major}) = 6.63$  min,  $t(\text{minor}) = 7.75$  min.

**Cut# : 1**

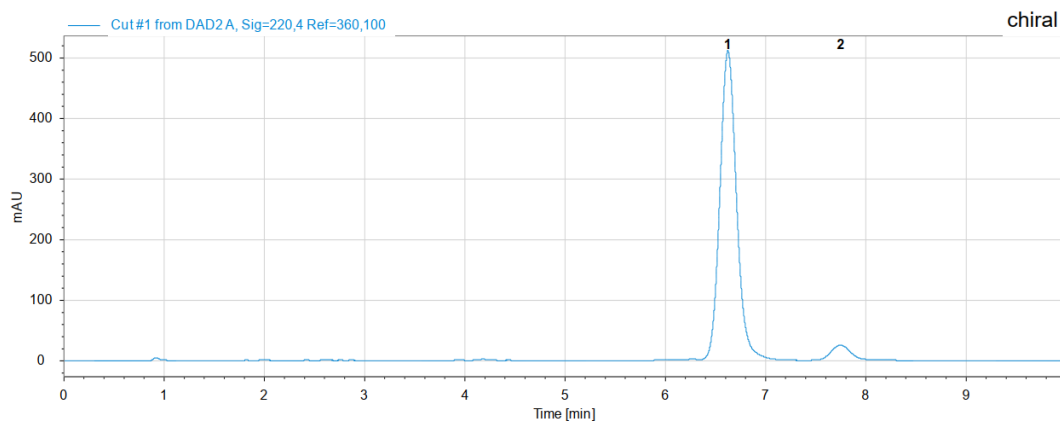

Signal: DAD2 A, Sig=220,4 Ref=360,100

| Compound | Cut | Ret.Time | Area                        | Width | Height  | Symmetry |
|----------|-----|----------|-----------------------------|-------|---------|----------|
| 1        | 1   | 6.628    | 5896.156<br><b>5896.156</b> | 0.178 | 510.956 | 0.868    |
| 2        | 1   | 7.751    | 352.259<br><b>352.259</b>   | 0.203 | 25.211  | 0.849    |

**Component table**

Signal: DAD2 A, Sig=220,4 Ref=360,100

| Component | 'D Sampling range [min] | Ret.Time <sup>2</sup> D [min] | Area     | Area%  |            |
|-----------|-------------------------|-------------------------------|----------|--------|------------|
| 1         | 8.97 - 9.01             | 6.628                         | 5896.156 | 94.362 | ee = 88.7% |
| 2         | 8.97 - 9.01             | 7.751                         | 352.259  | 5.638  |            |

**Determination of the ee of 9e**

Cut# : 1

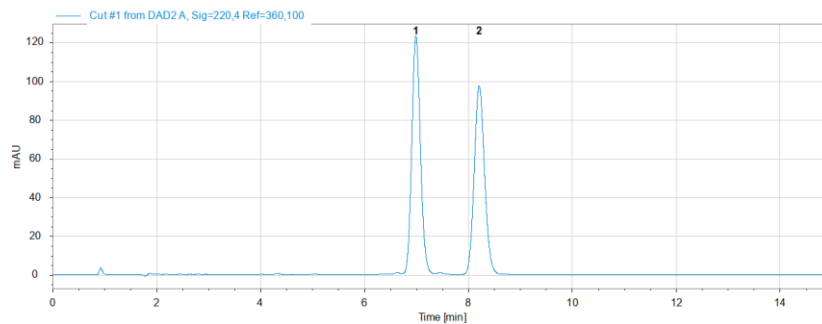

Signal: DAD2 A, Sig=220,4 Ref=360,100

| Compound | Cut | Ret.Time | Area                 | Width | Height  | Symmetry |
|----------|-----|----------|----------------------|-------|---------|----------|
| 1        | 1   | 6.996    | 1425.809<br>1425.809 | 0.176 | 123.430 | 0.883    |
| 2        | 1   | 8.213    | 1346.945<br>1346.945 | 0.208 | 97.494  | 0.896    |

### Component table

Signal: DAD2 A, Sig=220,4 Ref=360,100

| Component | <sup>1</sup> D Sampling range [min] | Ret.Time <sup>2</sup> D [min] | Area     | Area%  |
|-----------|-------------------------------------|-------------------------------|----------|--------|
| 1         | 9.19 - 9.23                         | 6.996                         | 1425.809 | 51.422 |
| 2         | 9.19 - 9.23                         | 8.213                         | 1346.945 | 48.578 |

chiral

Separation of the enantiomers of *rac-9e*

***N*-((1*S*,2*S*)-2-((*tert*-Butyldimethylsilyl)oxy)-1-phenylpent-4-en-1-yl)-4-methylbenzene-**

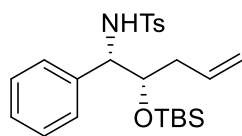

**sulfonamide (9a).** Prepared according to the representative procedure

**C.** Purified by flash chromatography (SiO<sub>2</sub>; hexane/methyl *tert*-butyl ether, 100:1 to 20:1) to give the title compound as a white solid (97 mg,

75%, >20:1 dr, 94% ee).  $[\alpha]_D^{20} = +29.8$  ( $c = 0.52$ , CHCl<sub>3</sub>); <sup>1</sup>H NMR (400

MHz, CDCl<sub>3</sub>)  $\delta$  7.55 – 7.50 (m, 2H), 7.15 – 7.04 (m, 5H), 7.02 – 6.98 (m, 2H), 5.72 (ddt,  $J = 17.3, 10.3, 7.2$  Hz, 1H), 5.35 (d,  $J = 8.0$  Hz, 1H), 5.11 (ddt,  $J = 10.2, 1.9, 1.0$  Hz, 1H), 5.02 (app. dq,  $J = 17.1, 1.5$  Hz, 1H), 4.48 (dd,  $J = 8.0, 2.5$  Hz, 1H), 3.71 (ddd,  $J = 9.0, 4.0, 2.5$  Hz, 1H), 2.41 (app. dddt,  $J = 14.0, 8.8, 7.7, 1.1$  Hz, 1H), 2.33 (s, 3H), 2.16 (dddd,  $J = 13.8, 6.8, 4.0, 1.4$  Hz, 1H), 0.80 (s, 9H), -0.17 (s, 3H), -0.45 (s, 3H); <sup>13</sup>C NMR (101 MHz, CDCl<sub>3</sub>)  $\delta$  143.0, 139.6, 138.1, 133.4, 129.3, 128.1, 127.1(8), 127.1(5), 127.0(9), 119.0, 77.1, 59.0, 49.6, 39.1, 27.1, 25.9, -4.7, -5.4; IR (ATR):  $\tilde{\nu} = 3285, 2951, 2926, 2884, 2854, 1597, 1495, 1453, 1404, 1361, 1326, 1251, 1159, 1084, 1067, 1004, 954, 907, 882, 834, 809, 777, 748, 600.671$ ; HRMS (ESI<sup>+</sup>,  $m/z$ ) calculated for [C<sub>24</sub>H<sub>35</sub>NO<sub>3</sub>SSi+Na]<sup>+</sup> ([M+Na]<sup>+</sup>) 468.1999, found 468.1997.

Note: Internal alkene isomer **11a** (rr = 7.6:1, NMR) was not separable by flash chromatography.

The ee was determined by 2D HPLC analysis. Step 1: Purification: 100 mm Zorbax RX-SiL,  $\varnothing$  4.6 mm i. d., *n*-heptane/methyl *tert*-butyl ether = 95:5,  $v = 1.0$  mL/min,  $\lambda = 220$  nm,  $t(\text{major}) = 4.31$  min, 308 K.

**<sup>1</sup>D chromatogram(s)**

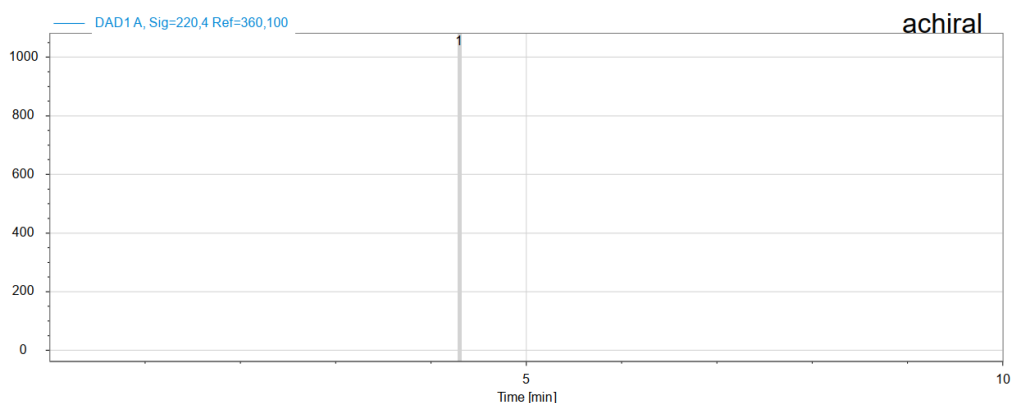

**Sampling table (<sup>1</sup>D)**

| Cut group | Cut # | <sup>1</sup> D Cut start [min] | <sup>1</sup> D Ret. time [min] | <sup>1</sup> D Duration [min] | Trigger | <sup>2</sup> D Run start [min] |                  |
|-----------|-------|--------------------------------|--------------------------------|-------------------------------|---------|--------------------------------|------------------|
|           | 1     | 4.28                           | 4.311                          | 0.04                          | Peak    | 4.33                           | 2nd diastereomer |

Separation of impurities on an achiral column

Step 2: Chiral resolution of the major diastereomer: Daicel 150 mm Chiralpak IG-3,  $\varnothing$  4.6 mm i. d., *n*-heptane/*i*-propanol = 95:5,  $v = 1.0$  mL/min,  $\lambda = 220$  nm,  $t(\text{minor}) = 5.85$  min,  $t(\text{major}) = 6.34$  min.

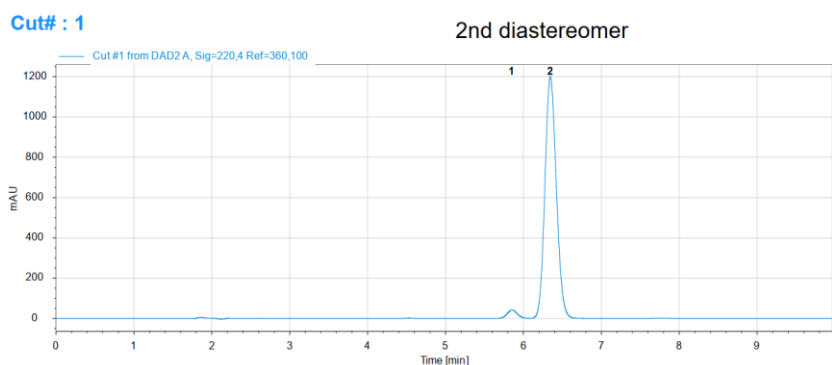

| Compound | Cut | Ret.Time | Area                   | Width | Height   | Symmetry |                |
|----------|-----|----------|------------------------|-------|----------|----------|----------------|
| 1        | 1   | 5.854    | 381.070<br>381.070     | 0.153 | 41.521   | 0.934    | 1st enantiomer |
| 2        | 1   | 6.345    | 12200.356<br>12200.356 | 0.169 | 1203.131 | 0.816    | 2nd enantiomer |

#### Component table

Signal: DAD2 A, Sig=220,4 Ref=360,100

| Component | <sup>1</sup> D Sampling range [min] | Ret.Time <sup>1</sup> D [min] | Area      | Area%  |                |
|-----------|-------------------------------------|-------------------------------|-----------|--------|----------------|
| 1         | 4.28 - 4.32                         | 5.854                         | 381.070   | 3.029  | 1st enantiomer |
| 2         | 4.28 - 4.32                         | 6.345                         | 12200.356 | 96.971 | 2nd enantiomer |

= 93.9 % ee

### Determination of the ee of **9a**

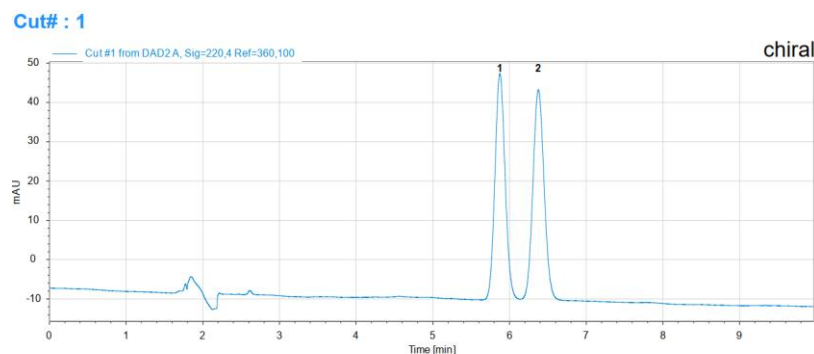

| Compound | Cut | Ret.Time | Area               | Width | Height | Symmetry |                |
|----------|-----|----------|--------------------|-------|--------|----------|----------------|
| 1        | 1   | 5.874    | 532.045<br>532.045 | 0.154 | 57.727 | 0.897    | 1st enantiomer |
| 2        | 1   | 6.376    | 543.938<br>543.938 | 0.169 | 53.661 | 1.016    | 2nd enantiomer |

#### Component table

Signal: DAD2 A, Sig=220,4 Ref=360,100

| Component | <sup>1</sup> D Sampling range [min] | Ret.Time <sup>1</sup> D [min] | Area    | Area%  |
|-----------|-------------------------------------|-------------------------------|---------|--------|
| 1         | 5.14 - 5.18                         | 5.874                         | 532.045 | 49.447 |
| 2         | 5.14 - 5.18                         | 6.376                         | 543.938 | 50.553 |

### Separation of the enantiomers of *rac*-**9a**

#### 4-Methyl-*N*-((1*S*,2*S*)-1-phenyl-2-((triethylsilyl)oxy)pent-4-en-1-yl)benzenesulfonamide

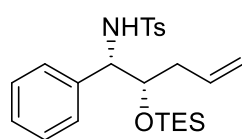

(**9b**). Prepared analogously according to the representative procedure **C**.

Purified by flash chromatography (SiO<sub>2</sub>; hexane/methyl *tert*-butyl ether, 100:1 to 20:1) to give the title compound as a colorless oil (117 mg, 91%, >20:1 dr, 93% ee).  $[\alpha]_D^{20} = +27.9$  ( $c = 0.48$ , CHCl<sub>3</sub>); <sup>1</sup>H NMR (400 MHz, CDCl<sub>3</sub>) δ 7.54 – 7.50 (m, 2H), 7.14 – 7.10 (m, 3H), 7.09 – 7.05 (m, 2H), 7.02 – 6.98 (m, 2H), 5.72 (ddt,  $J = 17.3, 10.3, 7.3$  Hz, 1H), 5.43 (d,  $J = 8.1$  Hz, 1H), 5.11 (ddt,  $J = 10.3, 2.0, 1.0$  Hz, 1H), 5.03 (app. dq,  $J = 17.1, 1.5$  Hz, 1H), 4.44 (dd,  $J = 8.0, 2.4$  Hz, 1H), 3.73 (ddd,  $J = 8.8, 4.3, 2.5$  Hz, 1H), 2.46 – 2.36 (m, 1H), 2.32 (s, 3H), 2.16 (app. dddt,  $J = 13.9, 7.0, 4.3, 1.4$  Hz, 1H), 0.77 (t,  $J = 7.9$  Hz, 9H), 0.42 – 0.25 (m, 6H); <sup>13</sup>C NMR (101 MHz, CDCl<sub>3</sub>) δ 142.9, 139.7, 138.2, 133.5, 129.3, 128.1, 127.2, 127.1, 127.0, 118.9, 77.0, 59.1, 39.3, 21.5, 6.8, 4.8; IR (ATR):  $\tilde{\nu} = 3308, 2956, 2913, 2877, 1600, 1495, 1455, 1408, 1328, 1215, 1159, 1086, 1066, 1005, 951, 929, 813, 700, 667$ ; HRMS (ESI<sup>+</sup>,  $m/z$ ) calculated for [C<sub>24</sub>H<sub>35</sub>NO<sub>3</sub>SSi+Na]<sup>+</sup> ([M+Na]<sup>+</sup>) 468.1999, found 468.2000.

Note: The corresponding internal alkene isomer **11b** (rr = 8.8:1, NMR) was not separable by flash chromatography.

The ee was determined by 2D HPLC analysis. Step 1: Purification: 50 mm Zorbax RX-SiL, Ø 4.6 mm i. d., *n*-heptane/*i*-propanol = 99.5:0.5,  $v = 1.0$  mL/min,  $\lambda = 220$  nm,  $t(\text{major}) = 1.91$  min, 308 K.

#### <sup>1</sup>D chromatogram(s)

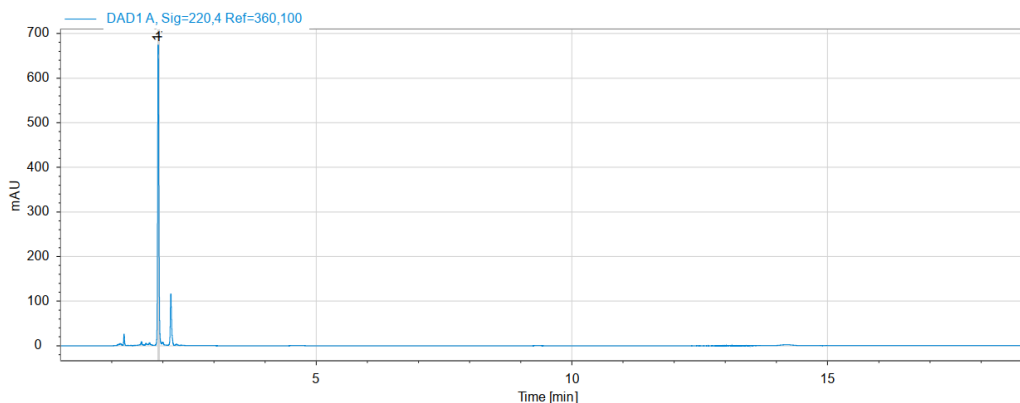

#### Sampling table (<sup>1</sup>D)

| Cut group | Cut # | <sup>1</sup> D Cut start [min] | <sup>1</sup> D Ret. time [min] | <sup>1</sup> D Duration [min] | Trigger | <sup>2</sup> D Run start [min] |
|-----------|-------|--------------------------------|--------------------------------|-------------------------------|---------|--------------------------------|
|           | 1     | 1.90                           | 1.906                          | 0.04                          | Peak    | 1.95 product                   |

Separation of impurities on an achiral column



Step 2: Chiral resolution of major diastereomer: Daicel 150 mm Chiralpak IG-3,  $\varnothing$  4.6 mm i. d., *n*-heptane/*i*-propanol = 98:2,  $\nu$  = 1.0 mL/min,  $\lambda$  = 220 nm,  $t$ (minor) = 12.41 min,  $t$ (major) = 14.82 min.

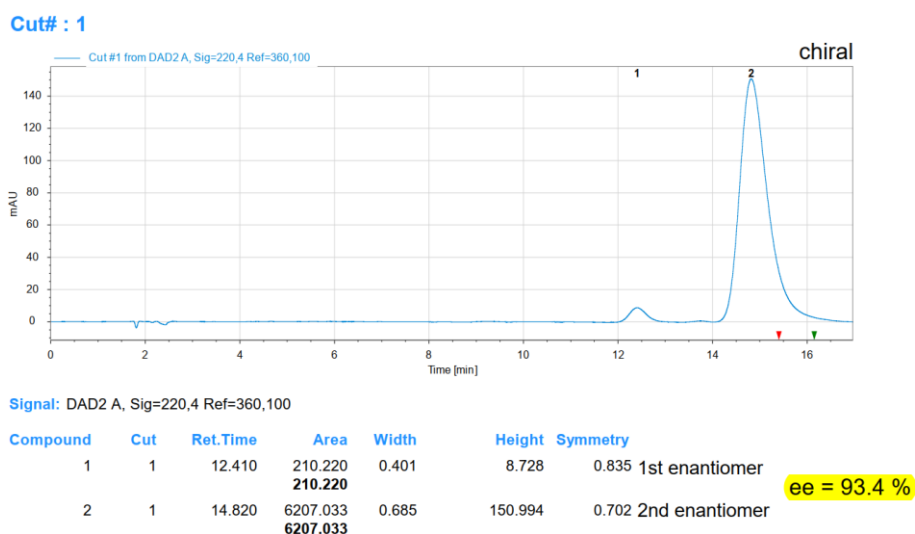

#### Component table

Signal: DAD2 A, Sig=220,4 Ref=360,100

| Component | 'D Sampling range [min] | Ret.Time 'D [min] | Area     | Area%  |
|-----------|-------------------------|-------------------|----------|--------|
| 1         | 1.89 - 1.93             | 12.410            | 210.220  | 3.276  |
| 2         | 1.89 - 1.93             | 14.820            | 6207.033 | 96.724 |

### Determination of the ee of **9b**

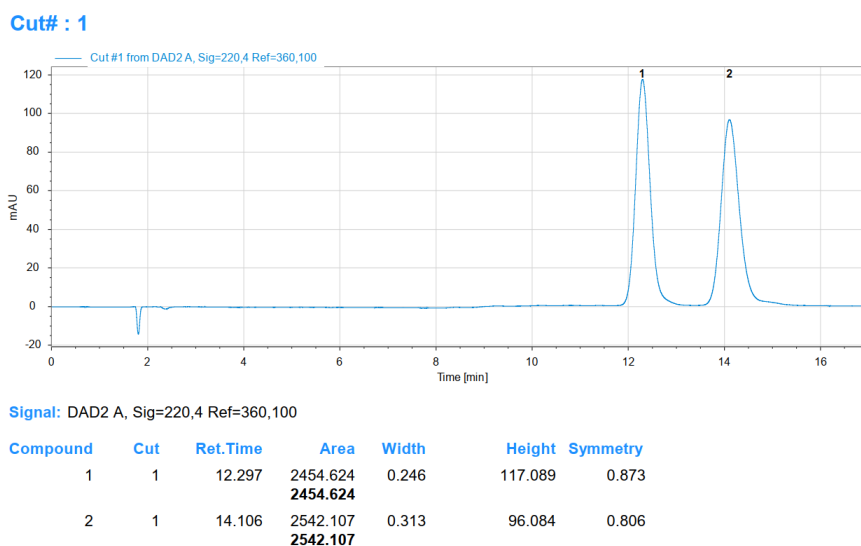

#### Component table

Signal: DAD2 A, Sig=220,4 Ref=360,100

| Component | 'D Sampling range [min] | Ret.Time 'D [min] | Area     | Area%                |
|-----------|-------------------------|-------------------|----------|----------------------|
| 1         | 1.90 - 1.94             | 12.297            | 2454.624 | 49.125 1. enantiomer |
| 2         | 1.90 - 1.94             | 14.106            | 2542.107 | 50.875 2. enantiomer |

### Separation of the enantiomers of *rac*-**9b**

## Assignment of the Absolute and Relative Configuration

The absolute and relative configuration of product **9c** was determined by X-ray crystallography after deprotection of TIPS group to give the corresponding aminoalcohol **12**.

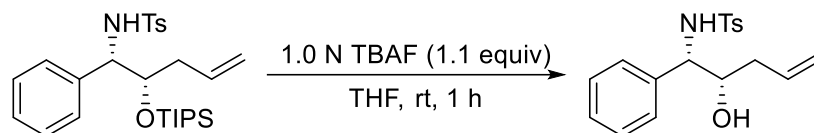

A solution of tetrabutylammonium fluoride (0.1 M in THF, 0.27 mL, 0.27 mmol) was added to a stirred solution of compound **9c** (122 mg, 0.25 mmol) in tetrahydrofuran (1.0 mL) and stirring was continued for 1 h at room temperature. Distilled water (2.0 mL) was added and the aqueous phase was extracted with methyl *tert*-butyl ether (3 x 2 mL). The combined organic layers were dried over Na<sub>2</sub>SO<sub>4</sub>, filtered and concentrated under reduced pressure to afford a white solid. The residue was purified by flash chromatography (SiO<sub>2</sub>; ethyl acetate/hexane, 1:10 to 1:3) to give the title compound as a white solid (80 mg, 97% yield). Single crystals suitable for X-ray diffraction analysis were obtained by diffusing *n*-hexane into a saturated solution of the compound in methyl *tert*-butyl ether at room temperature.

$[\alpha]_D^{20} = +35.1$  ( $c = 0.49$ , CHCl<sub>3</sub>); <sup>1</sup>H NMR (400 MHz, CDCl<sub>3</sub>)  $\delta$  7.51 – 7.47 (m, 2H), 7.20 – 7.12 (m, 3H), 7.10 – 7.06 (m, 2H), 7.05 – 7.01 (m, 2H), 5.74 (dddd,  $J = 16.9, 10.3, 7.7, 6.5$  Hz, 1H), 5.44 (br s, 1H), 5.13 (ddt,  $J = 10.2, 2.0, 1.1$  Hz, 1H), 5.08 (app. dq,  $J = 17.0, 1.5$  Hz, 1H), 4.26 (dd,  $J = 6.9, 5.1$  Hz, 1H), 3.75 (dt,  $J = 7.9, 4.9$  Hz, 1H), 2.33 (s, 3H), 2.27 – 2.10 (m, 2H); <sup>13</sup>C NMR (101 MHz, CDCl<sub>3</sub>)  $\delta$  143.2, 138.5, 137.6, 133.6, 129.4, 128.6, 127.8, 127.3, 127.2, 119.3, 74.0, 61.8, 38.2, 21.6; IR (ATR):  $\tilde{\nu} = 3475, 3289, 3199, 2920, 1597, 1494, 1455, 1430, 1317, 1288, 1231, 1205, 1186, 1156, 1089, 1052, 1002, 958, 925, 828, 810, 752, 700, 685, 660$ ; HRMS (ESI<sup>+</sup>,  $m/z$ ) calculated for [C<sub>18</sub>H<sub>20</sub>NO<sub>3</sub>S]<sup>+</sup> ([M-H]<sup>+</sup>) 330.1169, found 330.1173.

## Synthetic Applications

### ***N*-((1*S*,2*S*)-5-Hydroxy-1-phenyl-2-((triisopropylsilyl)oxy)pentyl)-4-methylbenzene-**

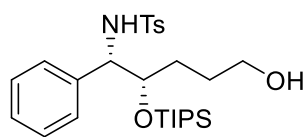

**sulfonamide (24).** Borane dimethylsulfide complex (55  $\mu\text{L}$ , 0.62 mmol) was added to a solution of compound **9c** (100 mg, 0.21 mmol) in tetrahydrofuran (8 mL) at 0 °C. After stirring for 1.5 h at room

temperature, the reaction was carefully quenched with distilled water (0.20 mL). Aqueous NaOH solution (3 M, 2 mL) and aqueous H<sub>2</sub>O<sub>2</sub> (35% w/w, 1.0 mL) were added to the mixture and stirring continued for 3 h at room temperature. The aqueous phase was extracted with ethyl acetate (3  $\times$  15 mL). The combined organic layers were dried over Na<sub>2</sub>SO<sub>4</sub>, filtered and concentrated under reduced pressure to give a white solid. The residue was purified by flash chromatography (SiO<sub>2</sub>; hexane/ethyl acetate, 15:1 to 3:1) to give the title compound as a colorless oil (90 mg, 87% yield). <sup>1</sup>H NMR (400 MHz, CDCl<sub>3</sub>)  $\delta$  7.57 – 7.52 (m, 2H), 7.18 – 7.00 (m, 7H), 5.42 (d, *J* = 7.8 Hz, 1H), 4.47 (dd, *J* = 7.7, 2.5 Hz, 1H), 3.95 (dt, *J* = 9.3, 2.7 Hz, 1H), 3.64 – 3.52 (m, 2H), 2.33 (s, 3H), 1.62 – 1.47 (m, 4H), 0.92 – 0.86 (m, 21H); <sup>13</sup>C NMR (101 MHz, CDCl<sub>3</sub>)  $\delta$  143.1, 139.6, 138.1, 129.4, 128.1, 127.2, 127.1, 127.0, 77.5, 62.8, 59.1, 31.1, 28.5, 21.5, 18.2, 18.0, 12.9; IR (ATR):  $\tilde{\nu}$  = 3023, 2944, 2867, 1600, 1495, 1454, 1402, 1326, 1215, 1157, 1088, 1063, 943, 883, 813, 770; HRMS (ESI<sup>+</sup>, *m/z*) calculated for [C<sub>27</sub>H<sub>43</sub>NO<sub>4</sub>SSi+Na]<sup>+</sup> ([M+Na]<sup>+</sup>) 528.2574, found 528.2574.

### **(2*S*,3*S*)-2-Phenyl-1-tosyl-3-((triisopropylsilyl)oxy)piperidine (25).**

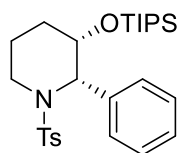

Methanesulfonyl chloride (25  $\mu\text{L}$ , 0.32 mmol) and triethylamine (88  $\mu\text{L}$ , 0.63 mmol) were added to a solution of alcohol **24** (80 mg, 0.16 mmol) in dichloromethane (3 mL) at –78 °C. After stirring for 2 h at this temperature, the reaction was quenched with saturated NH<sub>4</sub>Cl solution (1 mL) and the mixture was allowed to reach

room temperature. The aqueous phase was extracted with dichloromethane (3  $\times$  2 mL). The combined organic layers were washed with saturated NaHCO<sub>3</sub> solution, dried over Na<sub>2</sub>SO<sub>4</sub>, filtered and concentrated under reduced pressure to give a colorless oil. The oil was dissolved in tetrahydrofuran (3 mL) and potassium *tert*-butoxide (27 mg, 0.24 mmol) was added to the solution at 0 °C. After stirring for 1 h at room temperature, the reaction was quenched with saturated NH<sub>4</sub>Cl solution (1 mL). The aqueous phase was extracted with dichloromethane (3  $\times$  2 mL). The combined organic layers were dried over Na<sub>2</sub>SO<sub>4</sub>, filtered and concentrated under reduced pressure. The residue was purified by flash chromatography (SiO<sub>2</sub>; hexane/methyl *tert*-butyl ether, 100:1 to 20:1) to give the title compound as a pale yellow oil (71 mg, 92%). <sup>1</sup>H NMR (400 MHz, CDCl<sub>3</sub>)  $\delta$  7.76 – 7.69 (m, 2H), 7.70 – 7.62 (m, 2H), 7.30 – 7.18 (m, 5H), 5.28 (d, *J* = 5.4 Hz, 1H), 3.98 (ddd, *J* = 11.7, 5.5, 4.1 Hz, 1H), 3.85 – 3.74 (m, 1H), 2.85 (ddd, *J* = 14.2, 12.1, 4.1 Hz, 1H), 2.44 (s, 3H), 1.93 (app. qd, *J* = 12.1, 5.0 Hz, 1H), 1.83 – 1.74 (m, 1H),

1.61 – 1.56 (m, 2H), 1.05 – 0.99 (m, 21H);  $^{13}\text{C}$  NMR (101 MHz,  $\text{CDCl}_3$ )  $\delta$  143.2, 138.6, 136.9, 129.8, 129.5, 128.1, 127.2, 127.1, 71.7, 59.9, 40.8, 29.0, 24.7, 21.6, 18.2, 18.1, 12.3; IR (ATR):  $\tilde{\nu}$  = 2943, 2891, 2866, 1599, 1495, 1461, 1343, 1278, 1216, 1182, 1158, 1116, 1040, 1008, 954, 882, 861, 817, 727, 698; HRMS (ESI<sup>+</sup>,  $m/z$ ) calculated for  $[\text{C}_{27}\text{H}_{41}\text{NO}_3\text{SSi}+\text{Na}]^+$  ( $[\text{M}+\text{Na}]^+$ ) 510.2469, found 510.2468.

**(2S,3S)-2-Phenyl-3-((triisopropylsilyloxy)piperidine (26).** Magnesium powder (60 mg, 2.5

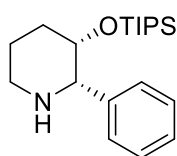

mmol) was added to a solution of compound **25** (60 mg, 0.12 mmol) in methanol (1.0 mL). The suspension was sonicated for 6 h at room temperature before the reaction was quenched with saturated  $\text{NH}_4\text{Cl}$  solution (2 mL). Then the residue was basified with aqueous  $\text{NaOH}$  (3 M) until  $\text{pH} \approx 10$  was reached.

The aqueous phase was extracted with dichloromethane (3  $\times$  10 mL). The combined organic layers were dried over  $\text{Na}_2\text{SO}_4$ , filtered and concentrated under reduced pressure. This residue was purified by flash chromatography ( $\text{SiO}_2$ ; hexane/ethyl acetate, 2:1 to 1:2) on activated silica gel (0.50 %  $v/v$   $\text{Et}_3\text{N}$  in hexane) to give the title compound as a colorless oil (31 mg, 76%, 90% ee).  $[\alpha]_D^{20} = +36.9$  ( $c = 0.54$ ,  $\text{CHCl}_3$ );  $^1\text{H}$  NMR (400 MHz,  $\text{CDCl}_3$ )  $\delta$  7.32 – 7.22 (m, 4H), 7.18 (app. ddd,  $J = 8.6, 5.5, 2.3$  Hz, 1H), 4.16 (dt,  $J = 3.6, 1.8$  Hz, 1H), 3.76 (d,  $J = 1.5$  Hz, 1H), 3.28 (ddt,  $J = 13.2, 4.2, 2.0$  Hz, 1H), 2.79 (td,  $J = 12.8, 3.1$  Hz, 1H), 2.57 (br s, 1H), 2.07 – 2.00 (m, 1H), 1.99 – 1.86 (m, 1H), 1.80 (td,  $J = 13.1, 3.9, 2.1$  Hz, 1H), 1.49 – 1.38 (m, 1H), 0.94 – 0.82 (m, 21H);  $^{13}\text{C}$  NMR (101 MHz,  $\text{CDCl}_3$ )  $\delta$  142.4, 128.0, 126.9, 126.6, 70.0, 64.8, 47.4, 33.3, 21.0, 18.1, 18.1, 12.8; IR (ATR):  $\tilde{\nu}$  = 3024, 2942, 2892, 2865, 1460, 1384, 1363, 1247, 1216, 1127, 1098, 1082, 1066, 1025, 924, 881, 698, 678, 640; HRMS (ESI<sup>+</sup>,  $m/z$ ) calculated for  $[\text{C}_{20}\text{H}_{36}\text{NOSi}]^+$  ( $[\text{M}+\text{H}]^+$ ) 334.2561, found 334.2561.

The ee was determined by HPLC analysis: Chiralpak 150 mm IB-N-3,  $\varnothing$  4.6 mm i. d., acetonitrile/20 mmol  $\text{NH}_4\text{HCO}_3$  pH 9 = 60:40,  $v = 1.0$  mL/min,  $\lambda = 210$  nm,  $t(\text{major}) = 11.76$  min,  $t(\text{minor}) = 20.77$  min.

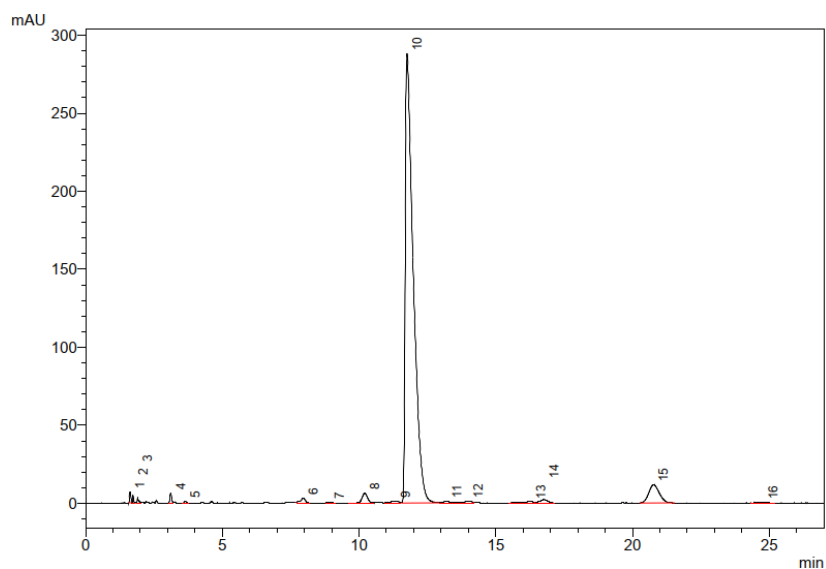

1 210nm,4nm

| Peak # | Ret. Time | Area % | Name                    |
|--------|-----------|--------|-------------------------|
| 1      | 1,62      | 0,38   |                         |
| 2      | 1,74      | 0,17   |                         |
| 3      | 1,90      | 0,22   |                         |
| 4      | 3,12      | 0,43   |                         |
| 5      | 3,65      | 0,11   |                         |
| 6      | 7,97      | 0,60   |                         |
| 7      | 8,92      | 0,10   |                         |
| 8      | 10,21     | 1,36   |                         |
| 9      | 11,34     | 0,38   |                         |
| 10     | 11,76     | 89,57  | 1. Enantiomer 89.8 % ee |
| 11     | 13,22     | 0,37   |                         |
| 12     | 14,00     | 0,35   |                         |
| 13     | 16,29     | 0,36   |                         |
| 14     | 16,77     | 0,67   |                         |
| 15     | 20,77     | 4,80   | 2. Enantiomer           |
| 16     | 24,78     | 0,14   |                         |
| Total  |           | 100,00 |                         |

### Determination of the ee of 26

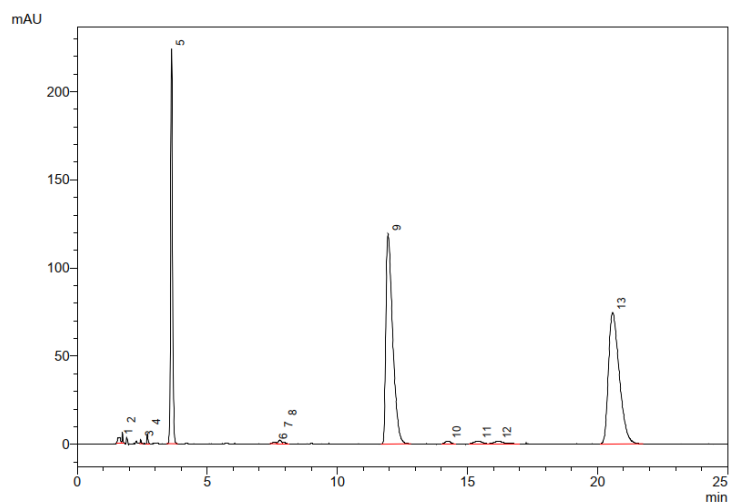

1 210nm,4nm

| Peak # | Ret. Time | Area % | Name          |
|--------|-----------|--------|---------------|
| 1      | 1,63      | 0,50   |               |
| 2      | 1,74      | 0,26   |               |
| 3      | 2,44      | 0,13   |               |
| 4      | 2,70      | 0,32   |               |
| 5      | 3,63      | 19,63  |               |
| 6      | 7,59      | 0,17   |               |
| 7      | 7,79      | 0,33   |               |
| 8      | 7,94      | 0,11   |               |
| 9      | 11,95     | 38,25  | 1. Enantiomer |
| 10     | 14,25     | 0,47   |               |
| 11     | 15,42     | 0,73   |               |
| 12     | 16,19     | 0,85   |               |
| 13     | 20,58     | 38,27  | 2. Enantiomer |
| Total  |           | 100,00 |               |

### Separation of enantiomers of *rac*-26

**(3S,4S)-3-Hydroxy-6-methyl-4-((4-methylphenyl)sulfonamido)heptanoic acid (29).** A

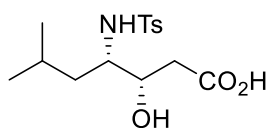

solution of aqueous  $\text{H}_2\text{SO}_4$  (1.5 M, 1.5 mL, 2.3 mmol) and potassium permanganate (730 mg, 4.6 mmol) in distilled water (15 mL) was added dropwise to a stirred solution of compound **28** (240 mg, 0.77 mmol) in acetone (15 mL) at 0 °C. The mixture was stirred at 0 °C for 10 min before the reaction was slowly quenched with neat  $\text{Na}_2\text{S}_2\text{O}_5$  until the solution was colorless. The mixture was acidified to  $\text{pH} \approx 3$  by dropwise addition of aqueous  $\text{H}_2\text{SO}_4$  (1.5 M). The layers were separated and the aqueous phase was extracted with ethyl acetate (3 × 5 mL). The combined organic layers were washed with brine, dried over  $\text{Na}_2\text{SO}_4$ , filtered and concentrated under reduced pressure to give a colorless oil. The residue was purified by flash chromatography (dichloromethane/methanol, 100:1 to 25:1) on activated silica gel (0.5 % v/v acetic acid in dichloromethane) to give the title compound as a white foam (131 mg, 52%).  $^1\text{H}$  NMR (400 MHz,  $\text{CDCl}_3$ )  $\delta$  7.79 – 7.73 (m, 2H), 7.32 – 7.27 (m, 2H), 5.29 (d,  $J = 9.1$  Hz, 1H), 4.08 (d,  $J = 9.2$  Hz, 1H), 3.28 (app. q,  $J = 8.3$  Hz, 1H), 2.72 (dd,  $J = 16.7, 9.4$  Hz, 1H), 2.53 (dd,  $J = 16.9, 3.1$  Hz, 1H), 2.42 (s, 3H), 1.48 – 1.31 (m, 2H), 1.10 – 0.96 (m, 1H), 0.70 (d,  $J = 6.5$  Hz, 3H), 0.66 (d,  $J = 6.3$  Hz, 3H);  $^{13}\text{C}$  NMR (101 MHz,  $\text{CDCl}_3$ )  $\delta$  177.1, 143.6, 138.3, 129.8, 127.1, 68.6, 55.6, 41.2, 38.7, 24.4, 22.7, 22.3, 21.7; IR (ATR):  $\tilde{\nu} = 3490, 3257, 2957, 2871, 1712, 1422, 1325, 1305, 1289, 1264, 1158, 1093, 1059, 971, 909, 815, 730, 704$ ; HRMS (ESI<sup>+</sup>,  $m/z$ ) calculated for  $[\text{C}_{15}\text{H}_{23}\text{NO}_5\text{S}+\text{Na}]^+$  ( $[\text{M}+\text{Na}]^+$ ) 352.1189, found 352.1189.

**Statine (30).** Naphthalene (486 mg, 3.79 mmol) was added to a suspension of lithium (26

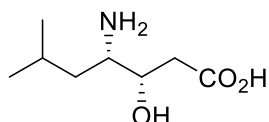

mg, 3.79 mmol) in tetrahydrofuran (3.0 mL) at 0 °C. The mixture was stirred at room temperature overnight before a solution of compound **29** (125 mg, 0.379 mmol) in tetrahydrofuran (1 mL) was added at 0 °C. The mixture was stirred at 0 °C for 10 min before the reaction was carefully quenched with a solution of aqueous HCl (1 M) until the  $\text{pH} \approx 3$  was reached. The layers were separated and the aqueous phase was extracted with methyl *tert*-butyl ether (3 × 5 mL). The aqueous phase was concentrated under reduced pressure to give a white solid. The residue was purified by ion exchange chromatography (Amberlite<sup>®</sup> IR-120,  $\text{H}^+$  form), eluting first with water and then with a  $\text{NH}_4\text{OH}$  solution (1 M) to give the title compound as a white solid (34 mg, 51%). An aliquot of this material (17 mg) was further purified with preparative HPLC (column: 50 mm Eclipse Plus C18, 1.8  $\mu\text{m}$ ,  $\varnothing$  4.6 mm i. d., methanol/0.1% TFA in  $\text{H}_2\text{O} = 30:70$ , 0.5 mL/min) to give an analytically pure sample of the title compound as a white amorphous solid (11 mg, 65%).  $[\alpha]_D^{20} = -7.8$  ( $c = 0.50$ ,  $\text{H}_2\text{O}$ ) (lit.:  $-20$  ( $c = 0.50$ ,  $\text{H}_2\text{O}$ ));<sup>5</sup>  $^1\text{H}$  NMR (400 MHz,  $\text{D}_2\text{O}$ )  $\delta$  4.13 (ddd,  $J = 8.6, 6.1, 3.8$  Hz, 1H), 3.35 (app. q,  $J = 6.7$  Hz, 1H), 2.78 (dd,  $J = 16.1, 3.8$  Hz, 1H), 2.60 (dd,  $J = 16.1, 8.9$  Hz, 1H), 1.73 (app. dp,  $J = 13.5, 6.7$  Hz, 1H), 1.53 (dd,  $J = 7.7, 6.0$  Hz, 2H), 0.96 (d,  $J = 6.9$  Hz, 3H), 0.94 (d,  $J = 6.9$  Hz, 3H);  $^{13}\text{C}$  NMR (101 MHz,  $\text{D}_2\text{O}$ )  $\delta$  178.0, 70.2, 56.6, 41.6, 41.1, 26.8, 25.0, 23.7; IR (ATR):  $\tilde{\nu} = 3257, 2961, 2933, 2876, 1729, 1665, 1600$ ,

1519, 1426, 1405, 1281, 1197, 1170, 1139, 1097, 1035, 987, 921, 878, 842, 798, 723, 700, 669; HRMS (ESI<sup>+</sup>, *m/z*) calculated for [C<sub>8</sub>H<sub>18</sub>NO<sub>3</sub>]<sup>+</sup> ([M+H]<sup>+</sup>) 176.1281, found 176.1284. Matches known data.<sup>5</sup>

## NMR Spectra

$^1\text{H}$  NMR (400 MHz,  $\text{CDCl}_3$ ; top) and  $^{13}\text{C}$  NMR (101 MHz,  $\text{CDCl}_3$ ; bottom) of compound **9a**  
(NOTE: the minor internal alkene isomer **11a** was not separable by flash chromatography)

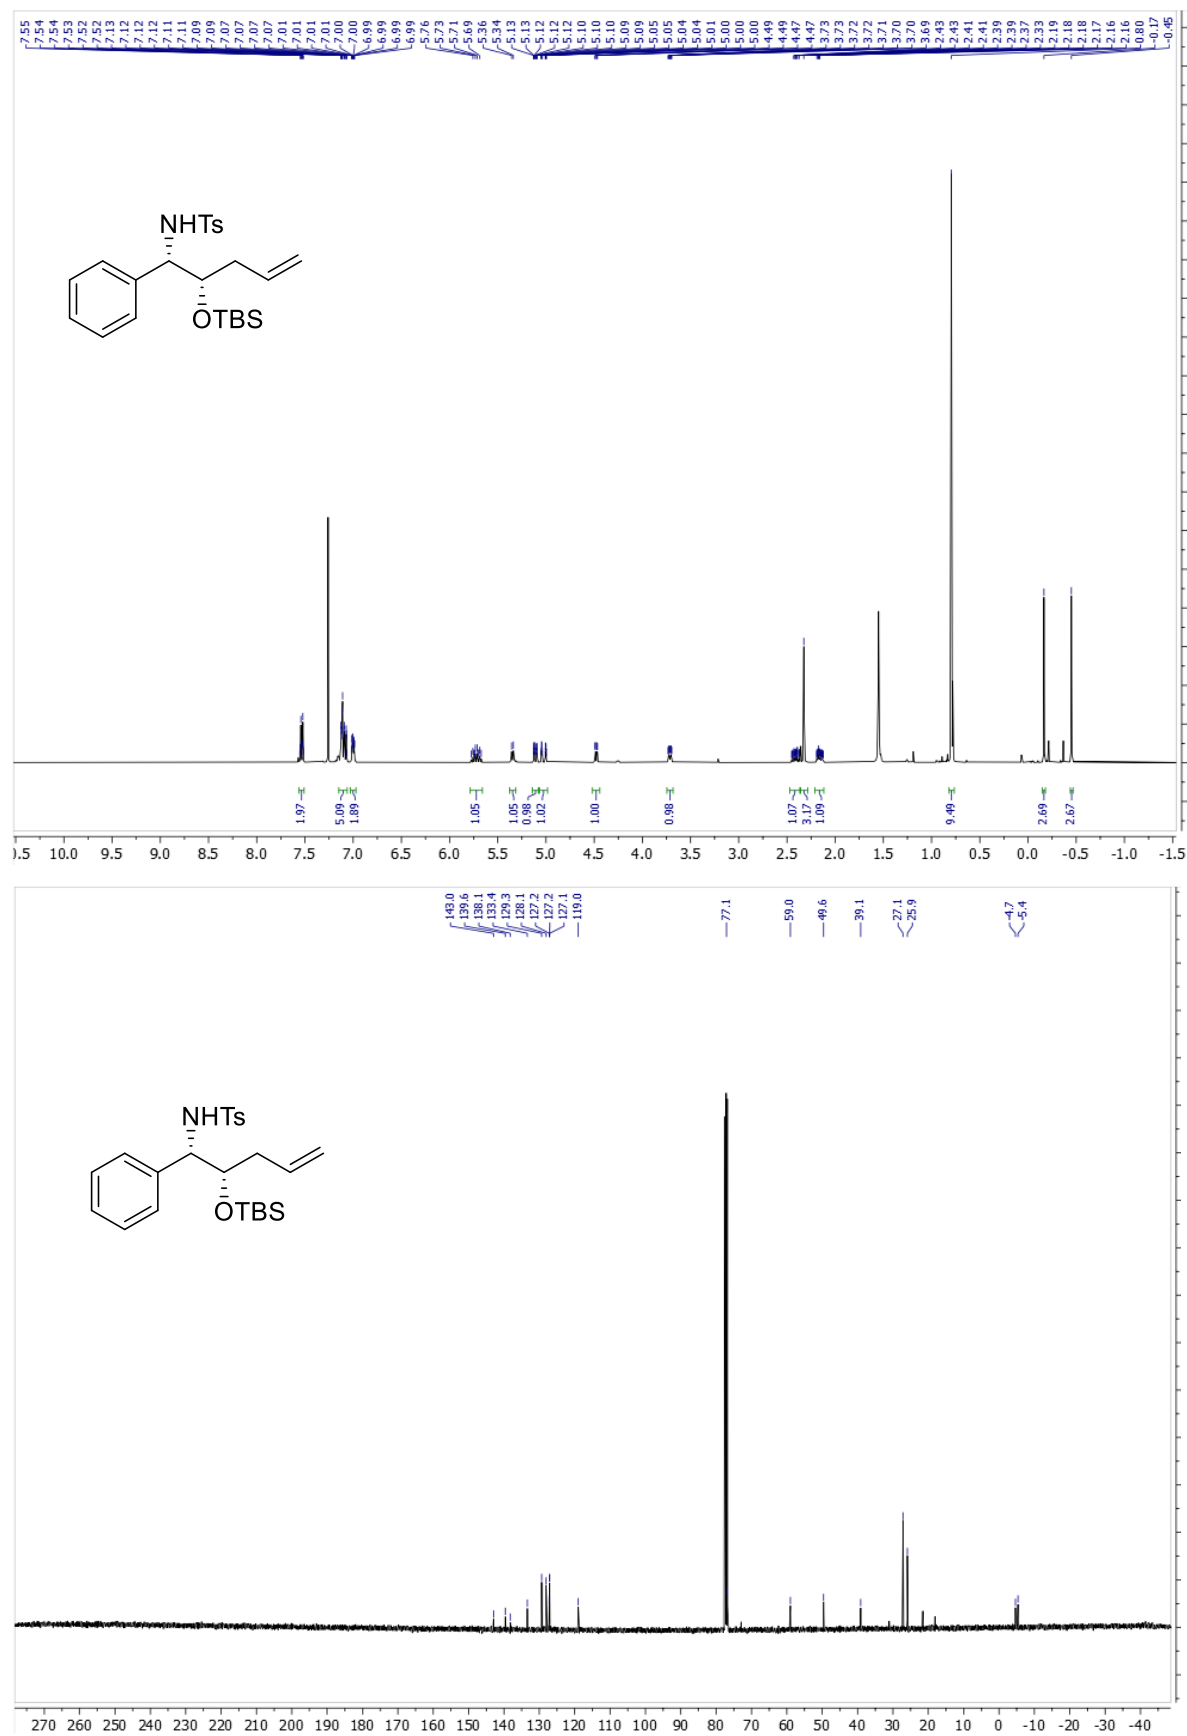



$^1\text{H}$  NMR (400 MHz,  $\text{CDCl}_3$ ; top) and  $^{13}\text{C}$  NMR (101 MHz,  $\text{CDCl}_3$ ; bottom) of compound **9b**  
 (NOTE: the minor internal alkene isomer **11b** was not separable by flash chromatography)

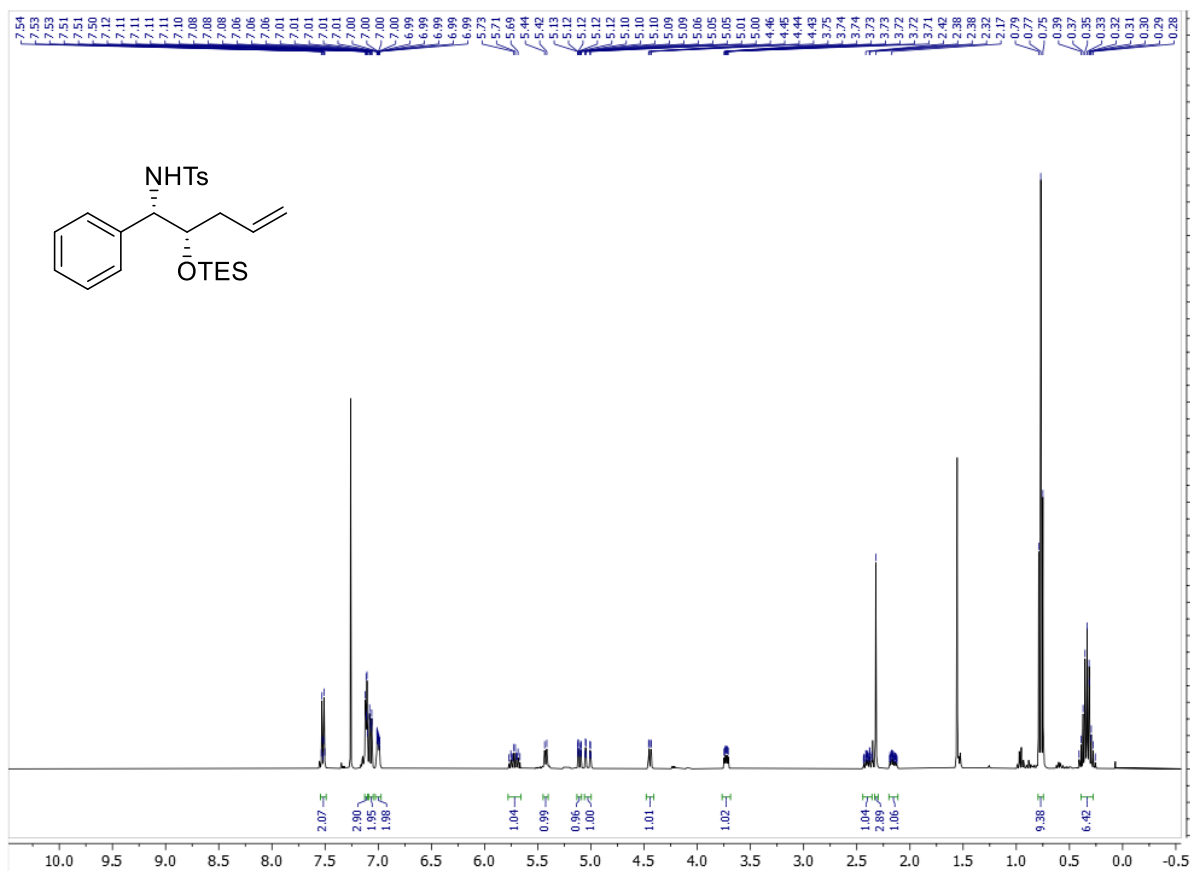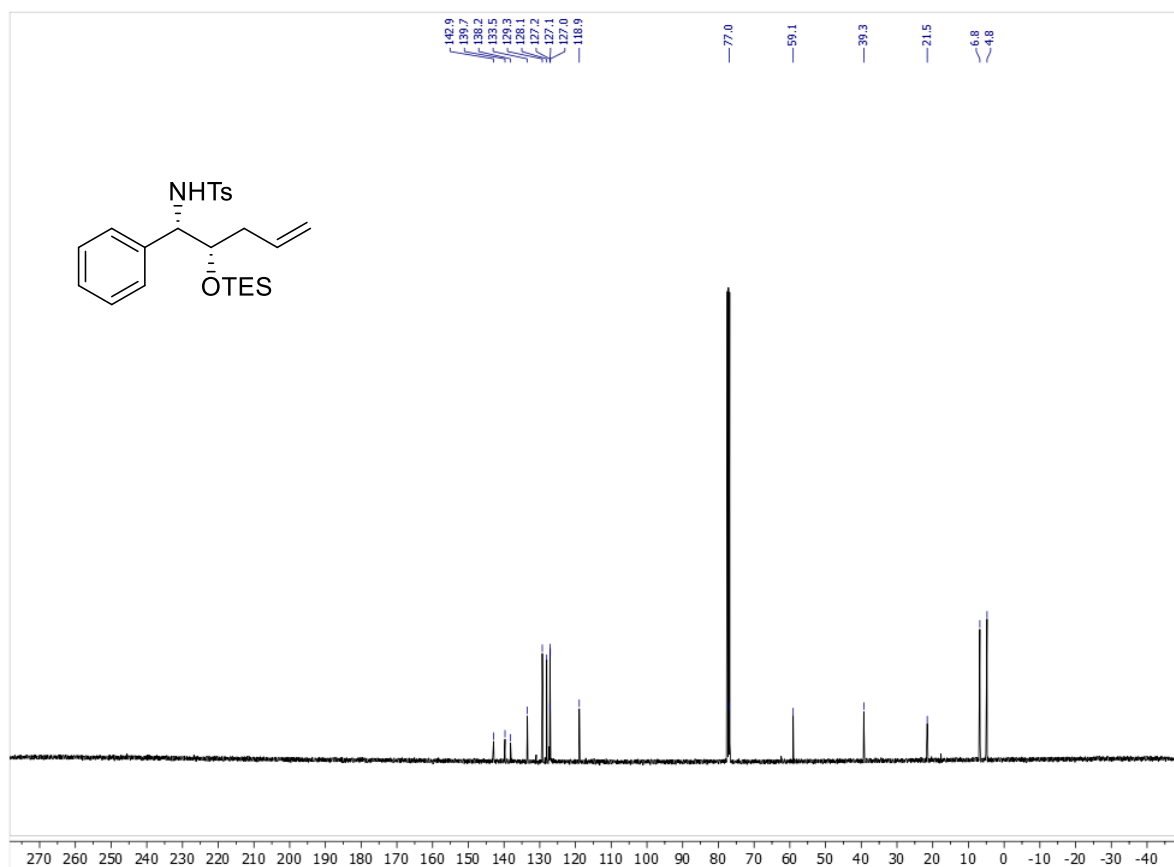

$^1\text{H}$  NMR (400 MHz,  $\text{CDCl}_3$ ; top) and  $^{13}\text{C}$  NMR (101 MHz,  $\text{CDCl}_3$ ; bottom) of compound **9c**

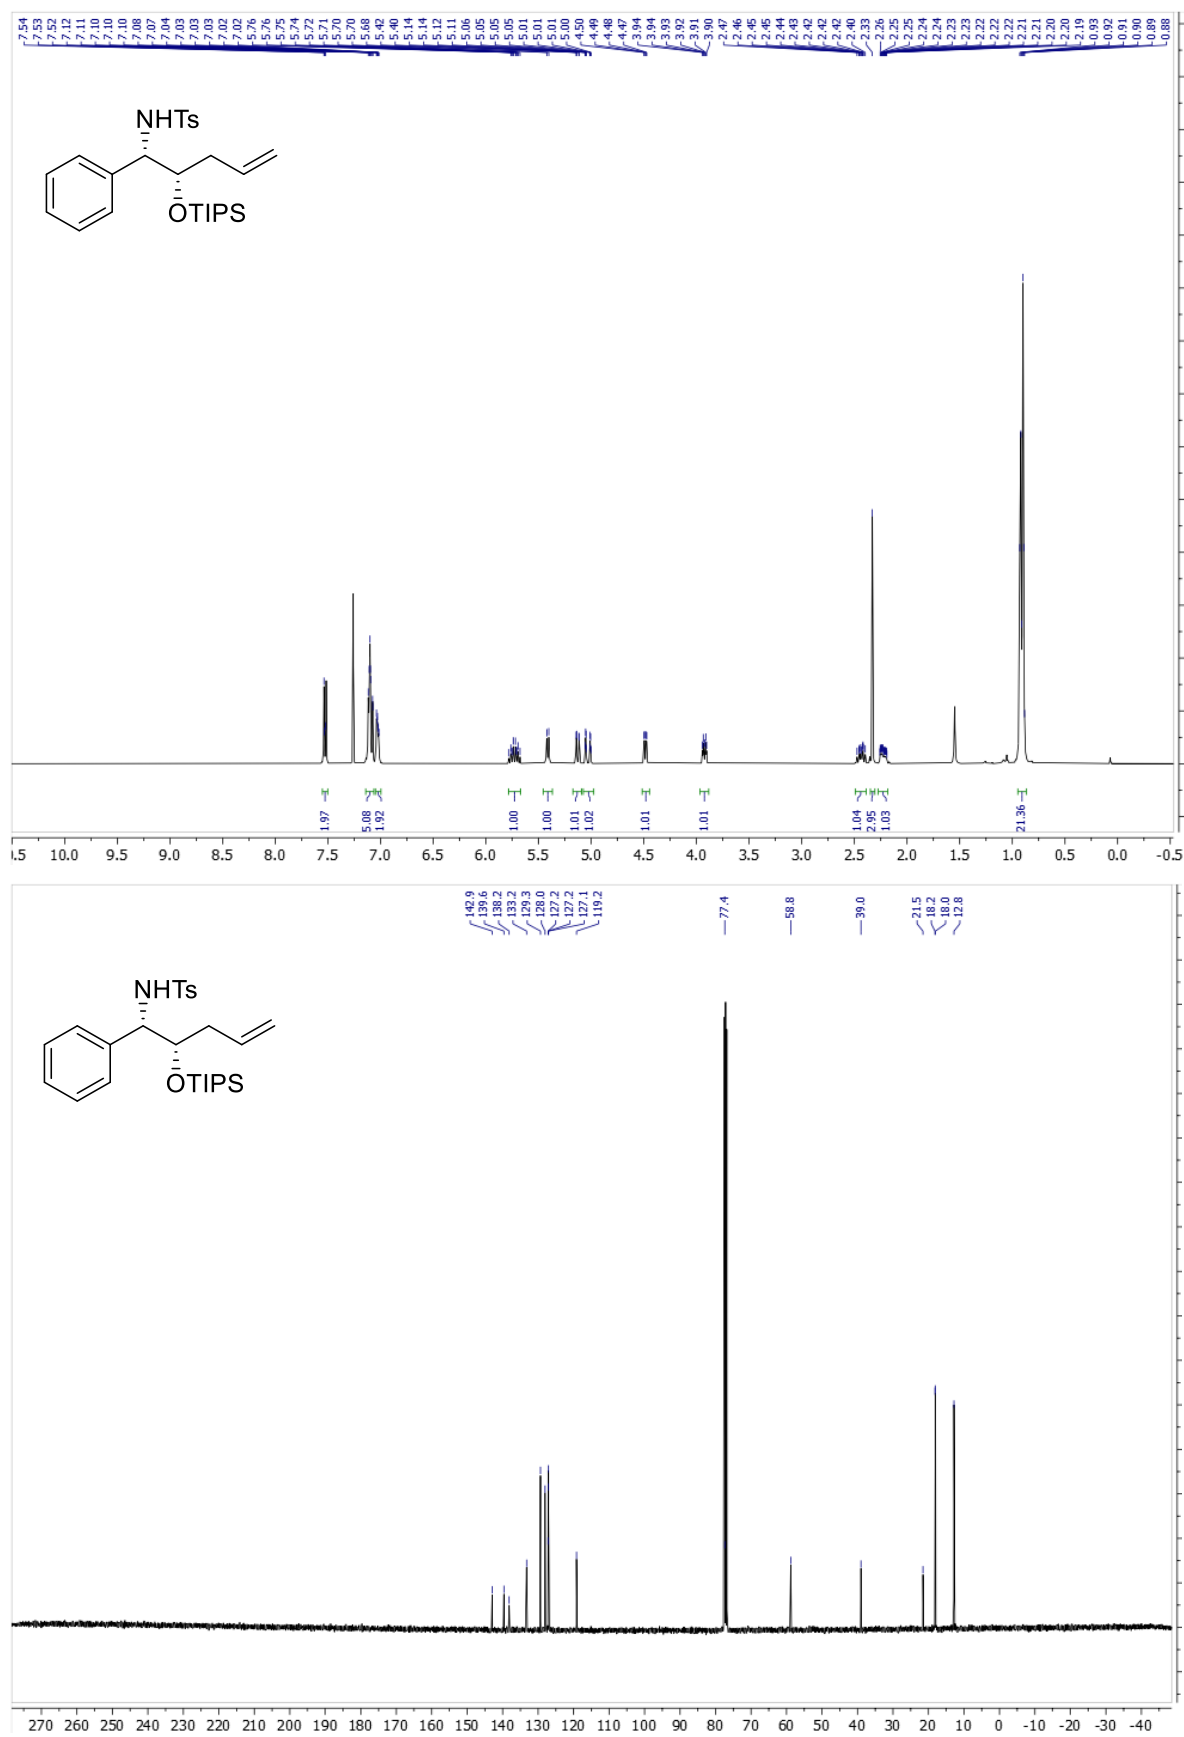

$^1\text{H}$  NMR (400 MHz,  $\text{CDCl}_3$ ; top) and  $^{13}\text{C}$  NMR (101 MHz,  $\text{CDCl}_3$ ; bottom) of compound **9d**

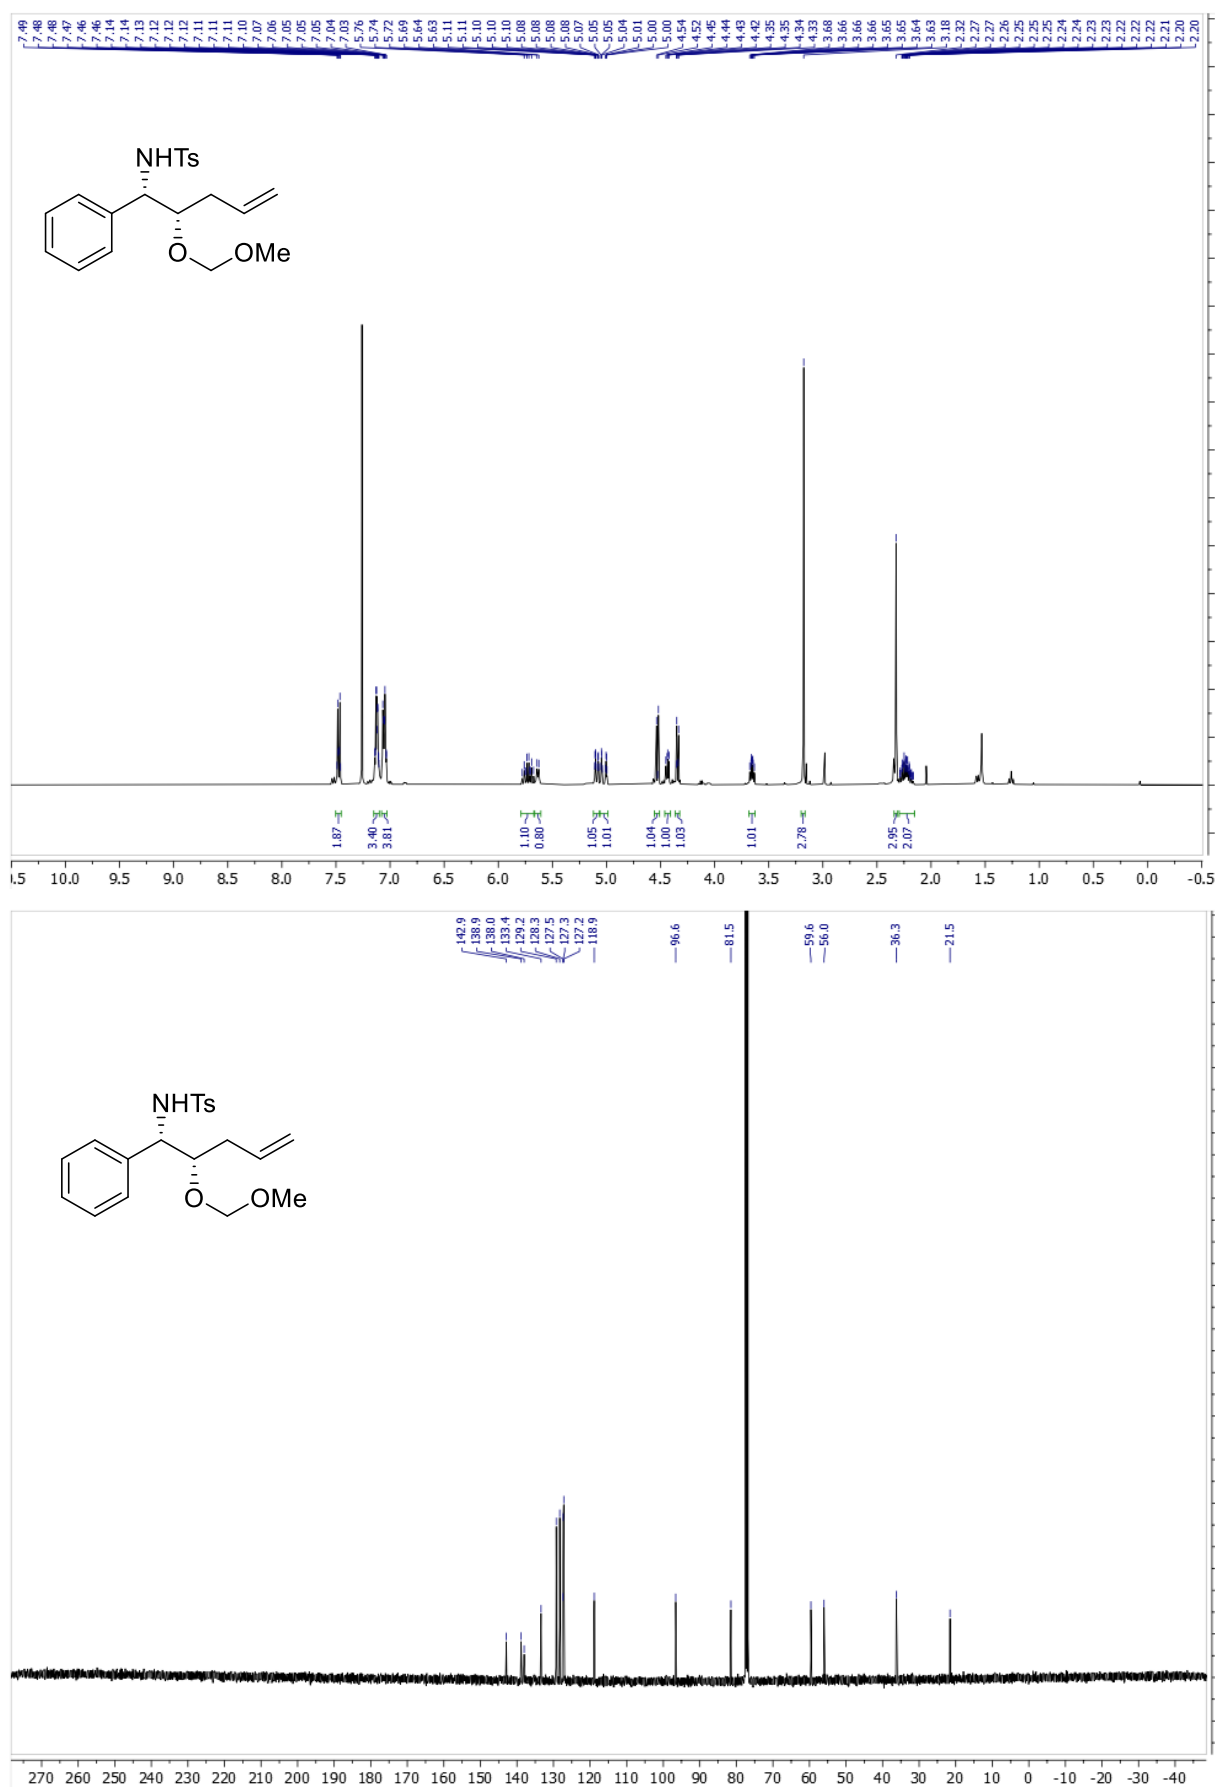

$^1\text{H}$  NMR (400 MHz,  $\text{CDCl}_3$ ; top) and  $^{13}\text{C}$  NMR (101 MHz,  $\text{CDCl}_3$ ; bottom) of compound **9e**  
(NOTE: the minor internal alkene isomer **11e** was not separable by flash chromatography)

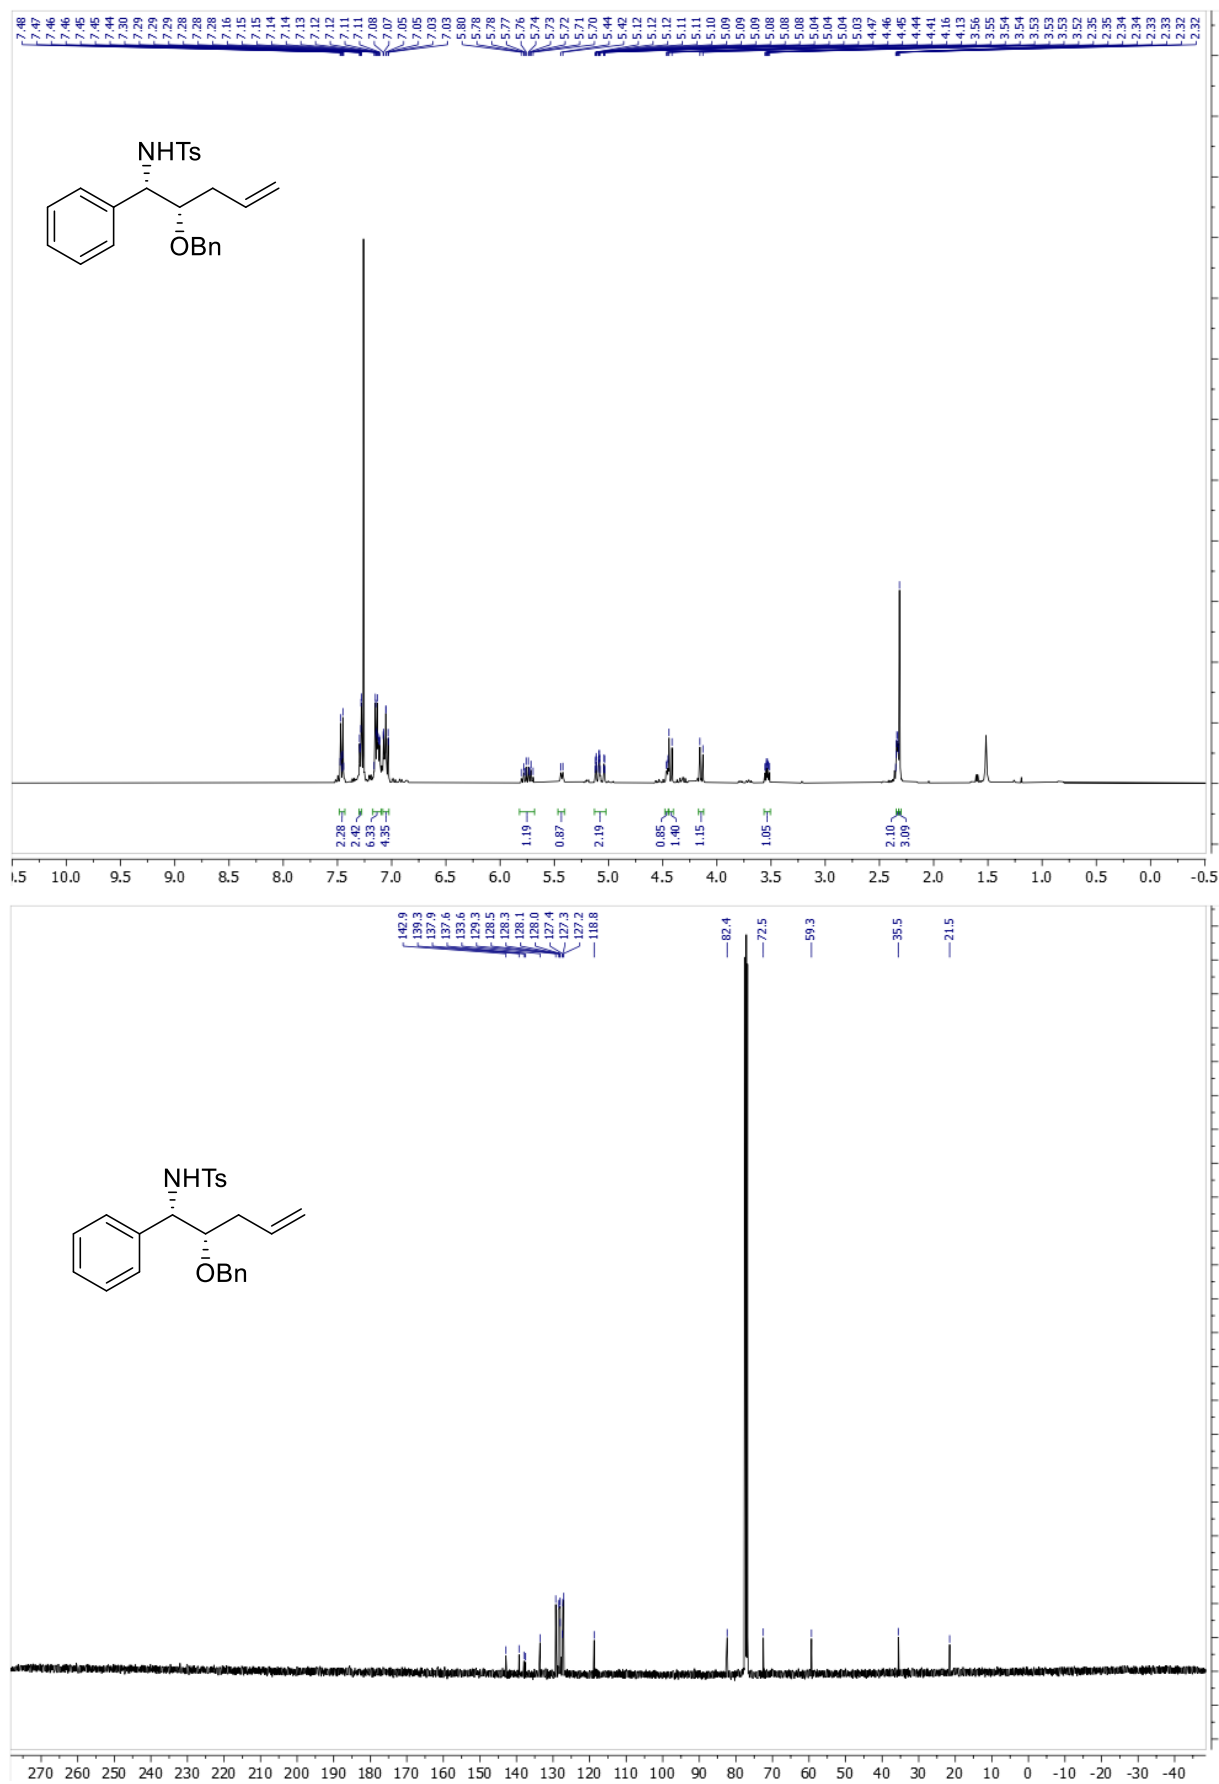

$^1\text{H}$  NMR (400 MHz,  $\text{CDCl}_3$ ; top) and  $^{13}\text{C}$  NMR (101 MHz,  $\text{CDCl}_3$ ; bottom) of compound **12**

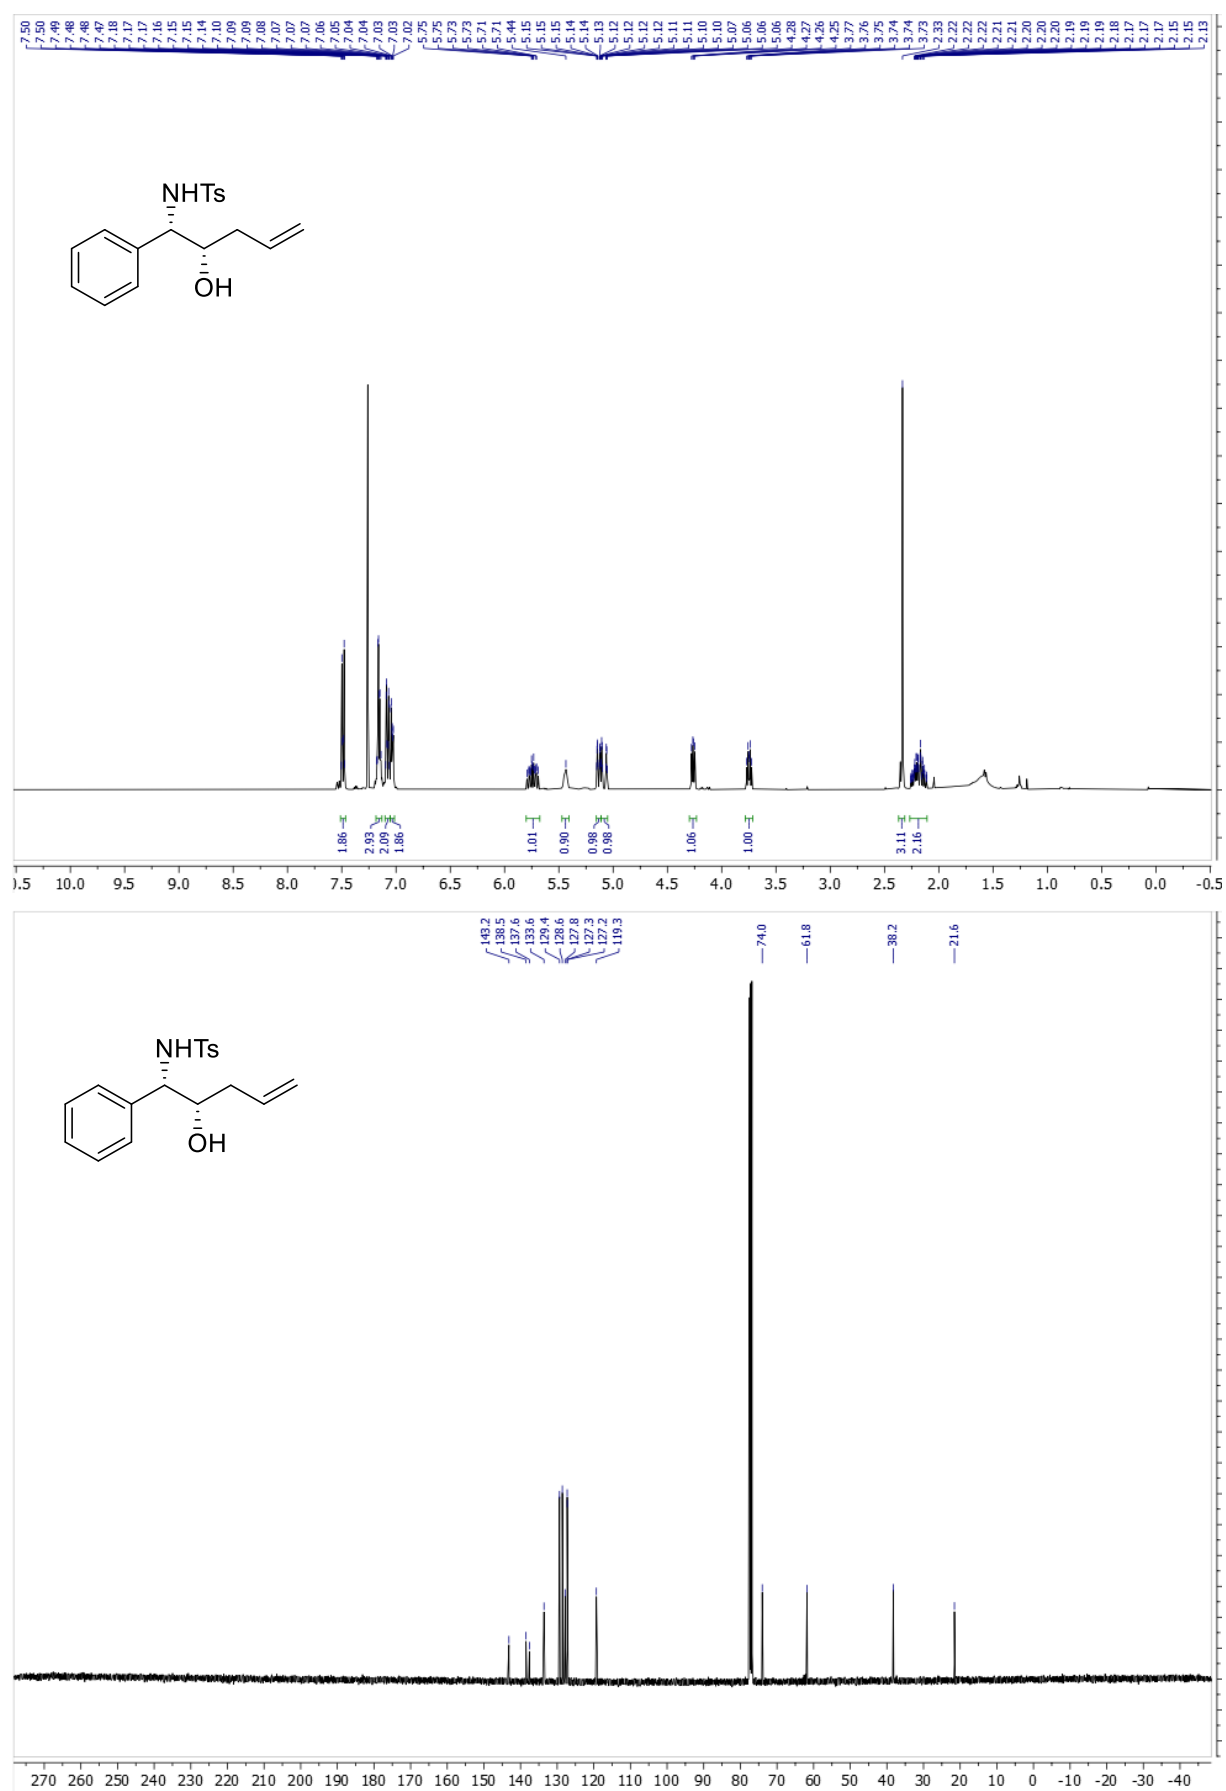

$^1\text{H}$  NMR (400 MHz,  $\text{CDCl}_3$ ; top) and  $^{13}\text{C}$  NMR (101 MHz,  $\text{CDCl}_3$ ; bottom) of compound **13a**

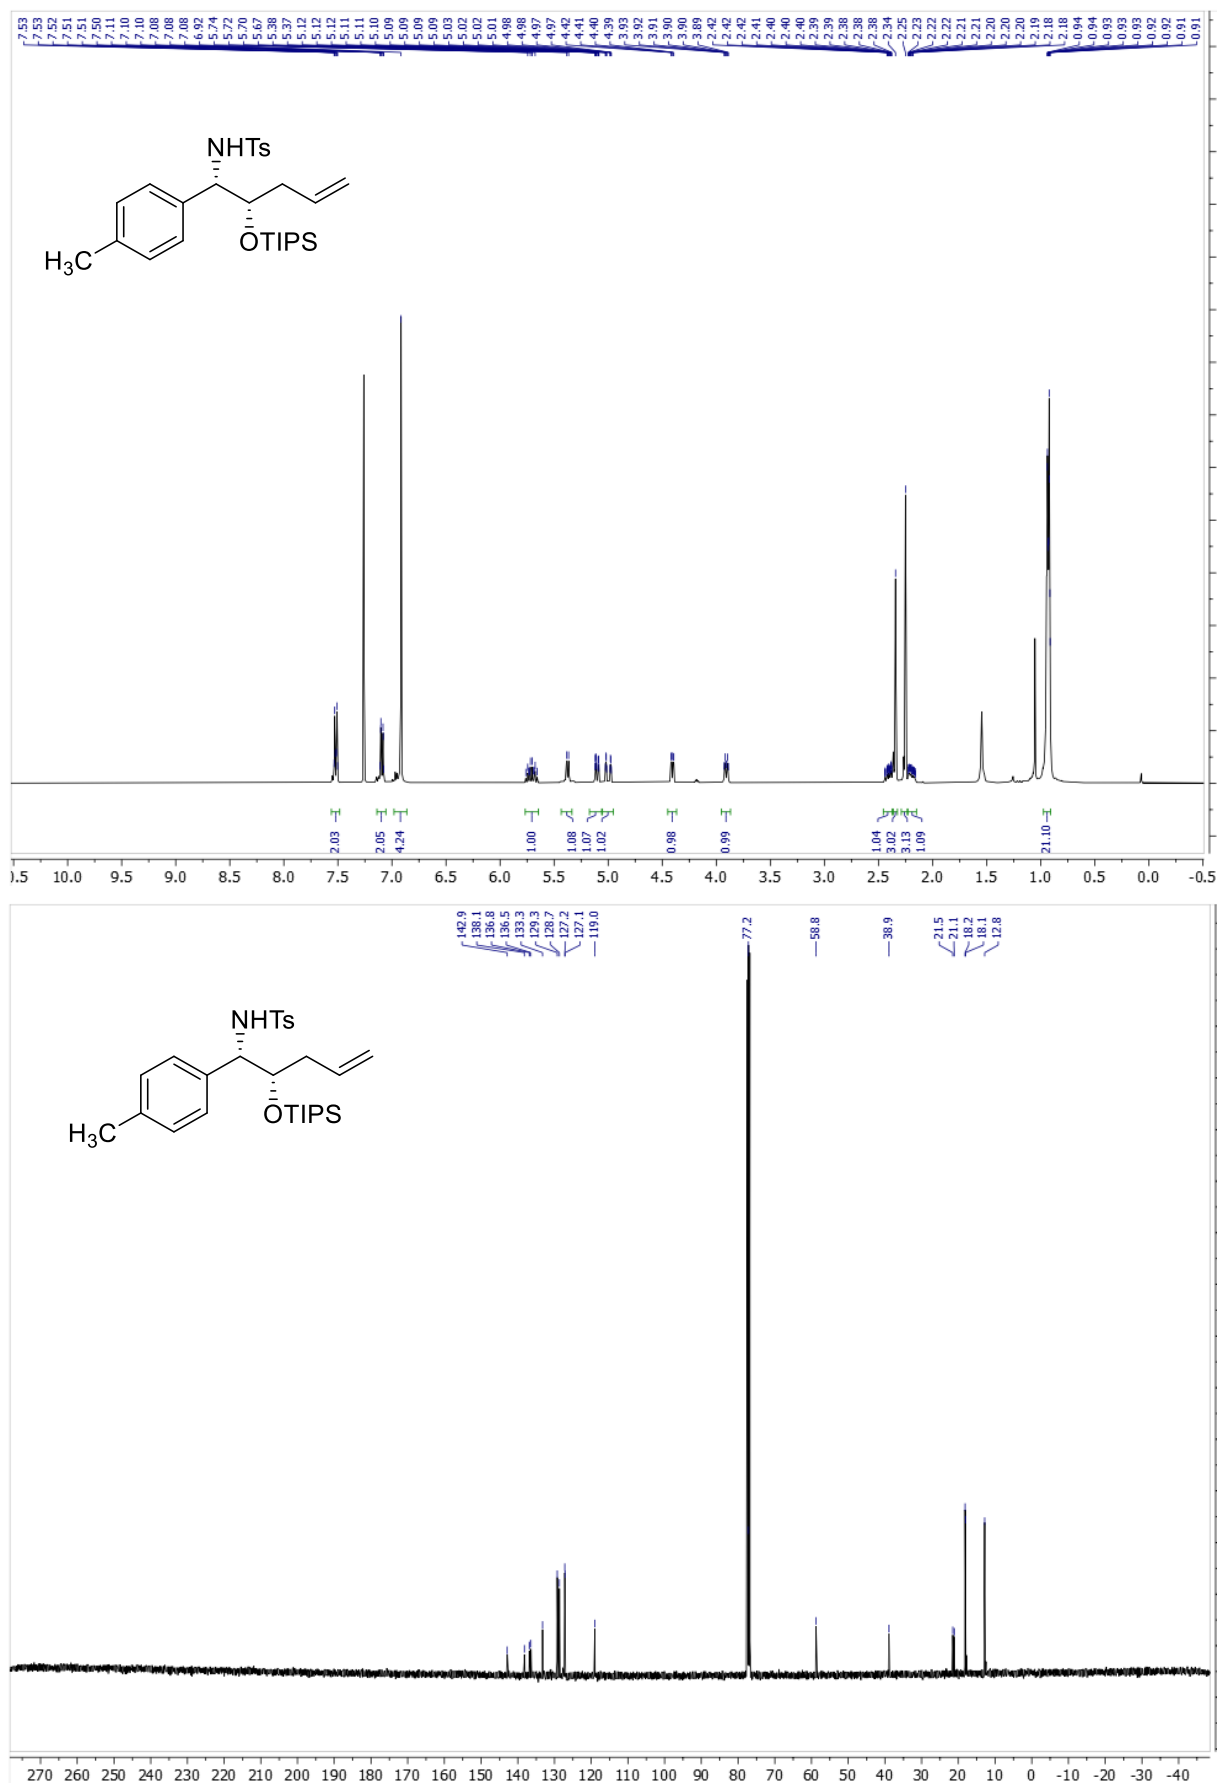

$^1\text{H}$  NMR (400 MHz,  $\text{CDCl}_3$ ; top) and  $^{13}\text{C}$  NMR (101 MHz,  $\text{CDCl}_3$ ; bottom) of compound **13b**

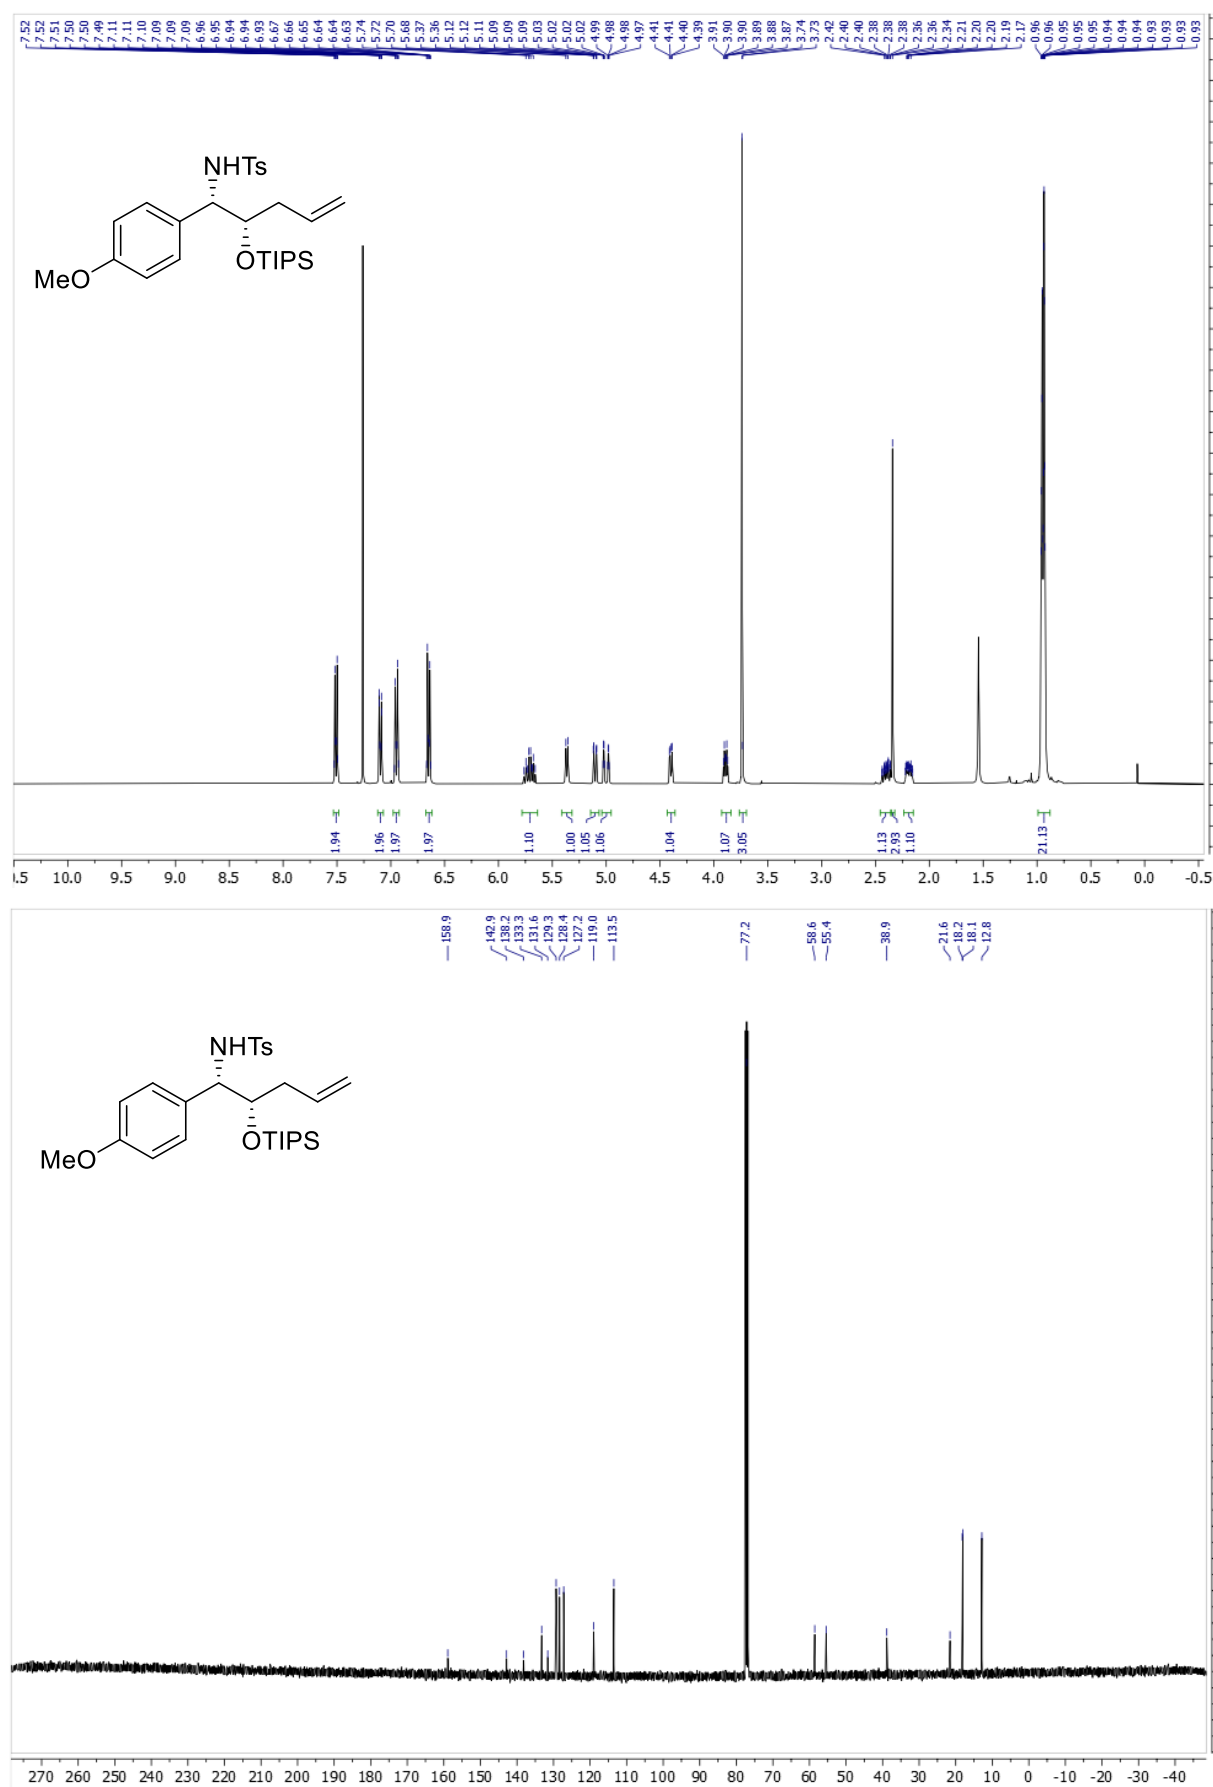

<sup>1</sup>H NMR (400 MHz, CDCl<sub>3</sub>; top) and <sup>13</sup>C NMR (101 MHz, CDCl<sub>3</sub>; bottom) of compound **13c**

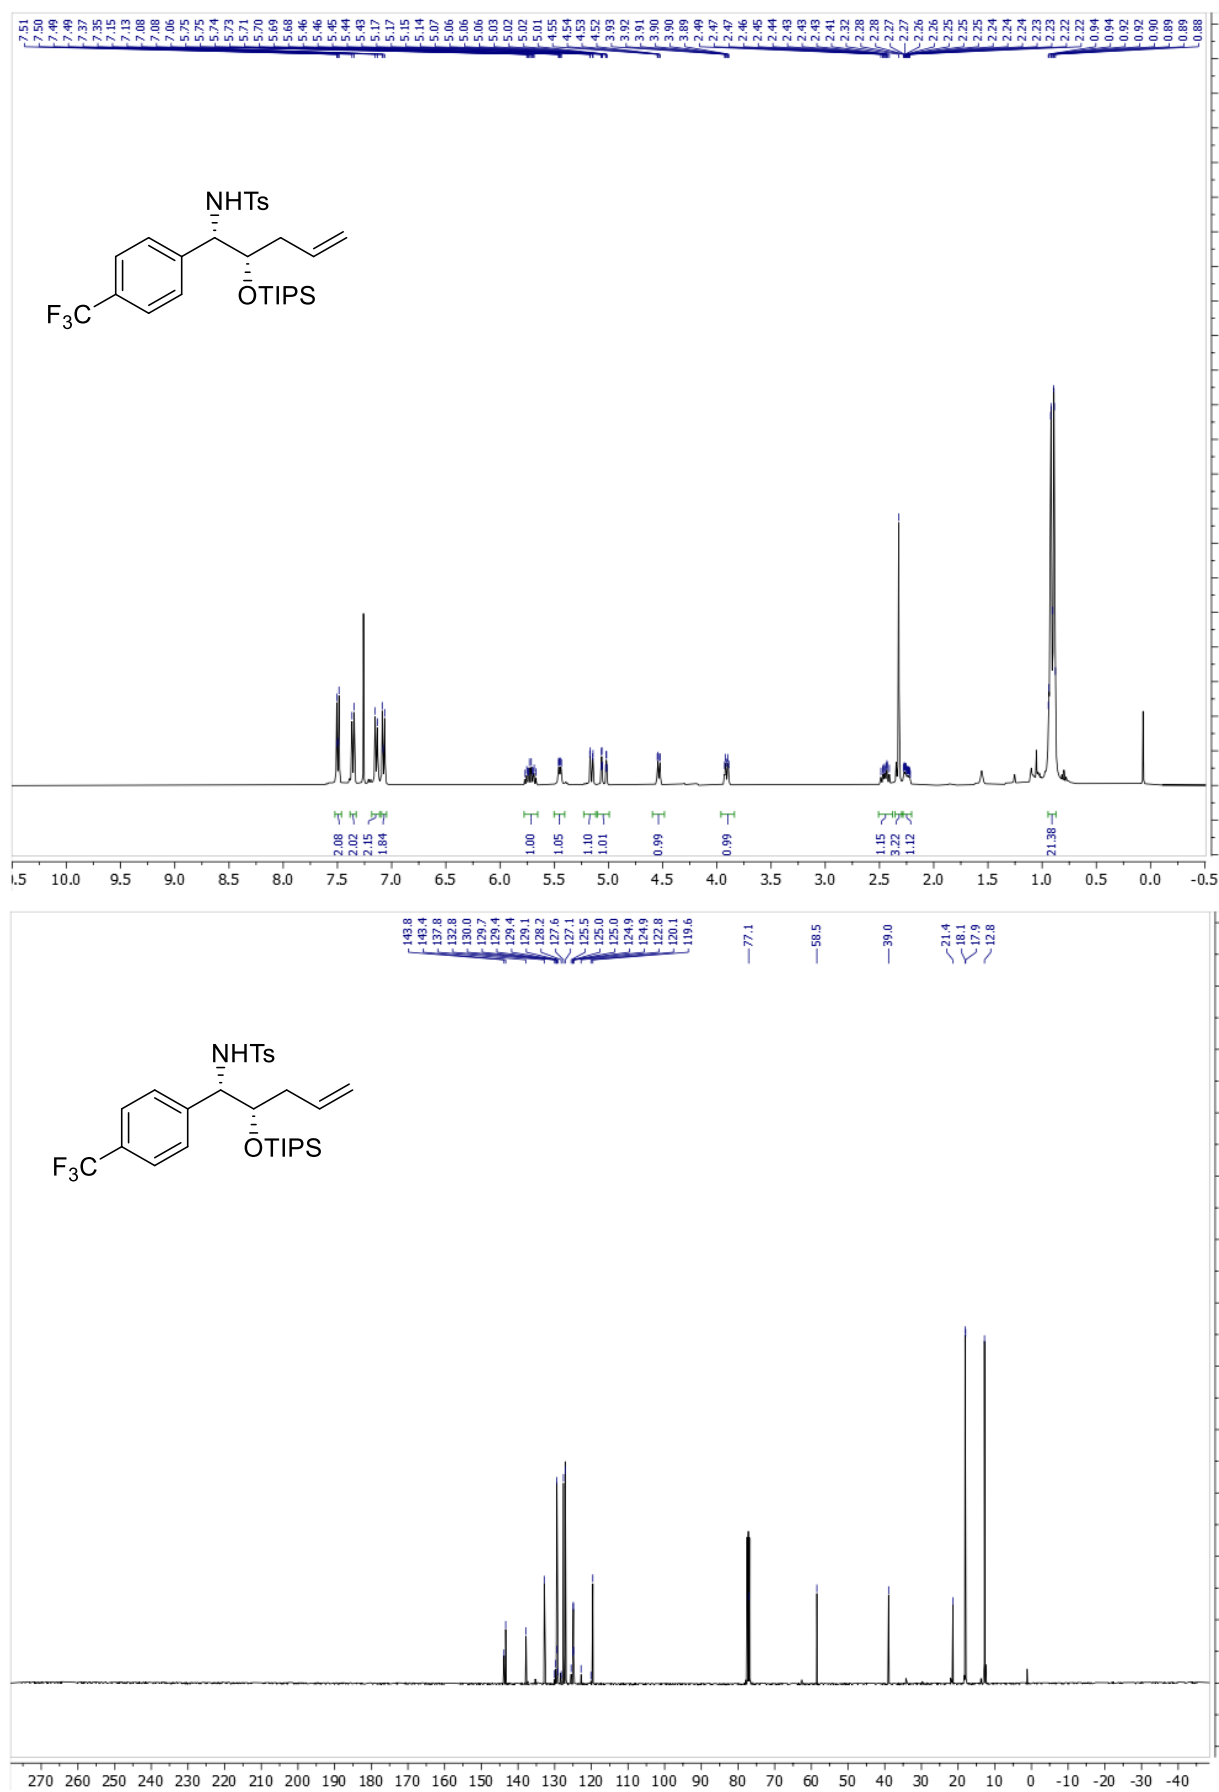



$^{19}\text{F}$  NMR (282 MHz,  $\text{CDCl}_3$ ) of compound **13c**

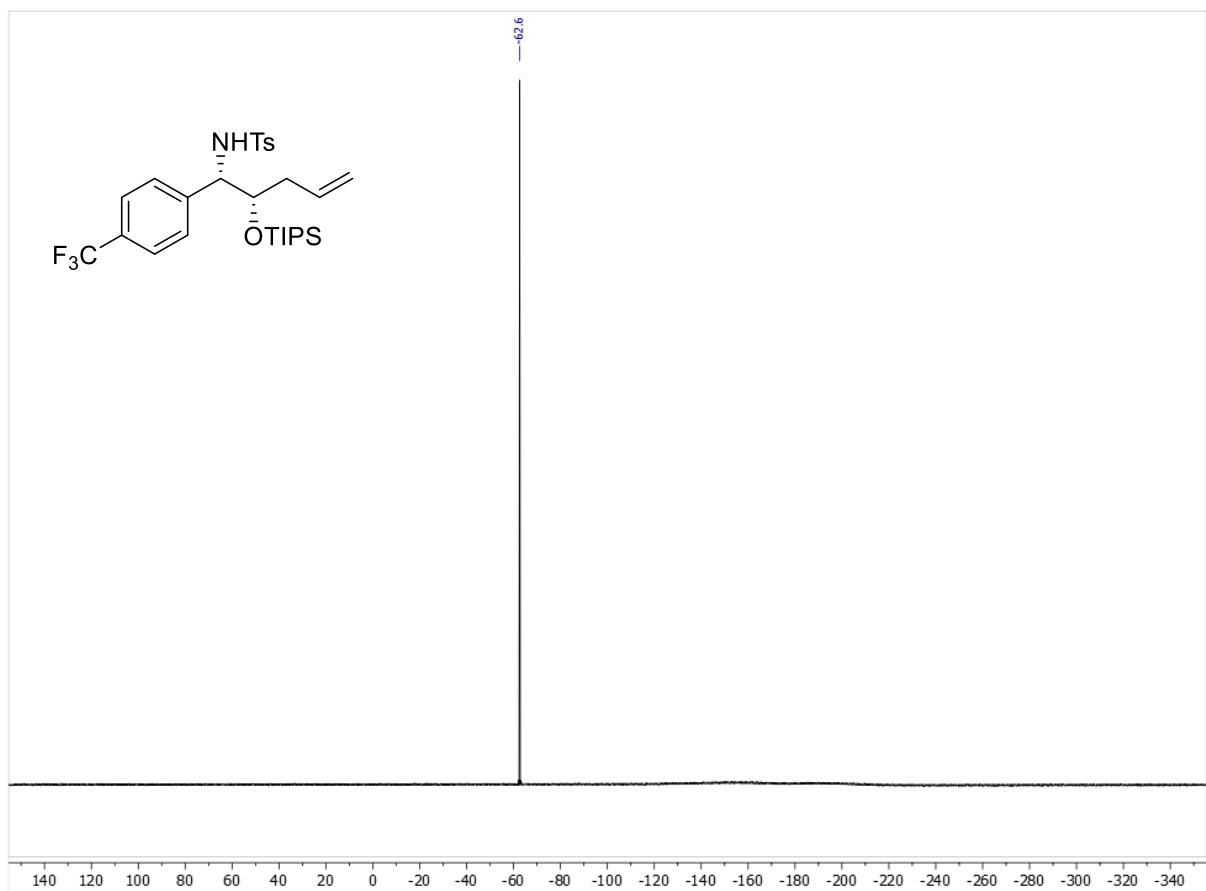

$^1\text{H}$  NMR (400 MHz,  $\text{CDCl}_3$ ; top) and  $^{13}\text{C}$  NMR (101 MHz,  $\text{CDCl}_3$ ; bottom) of compound **13d**

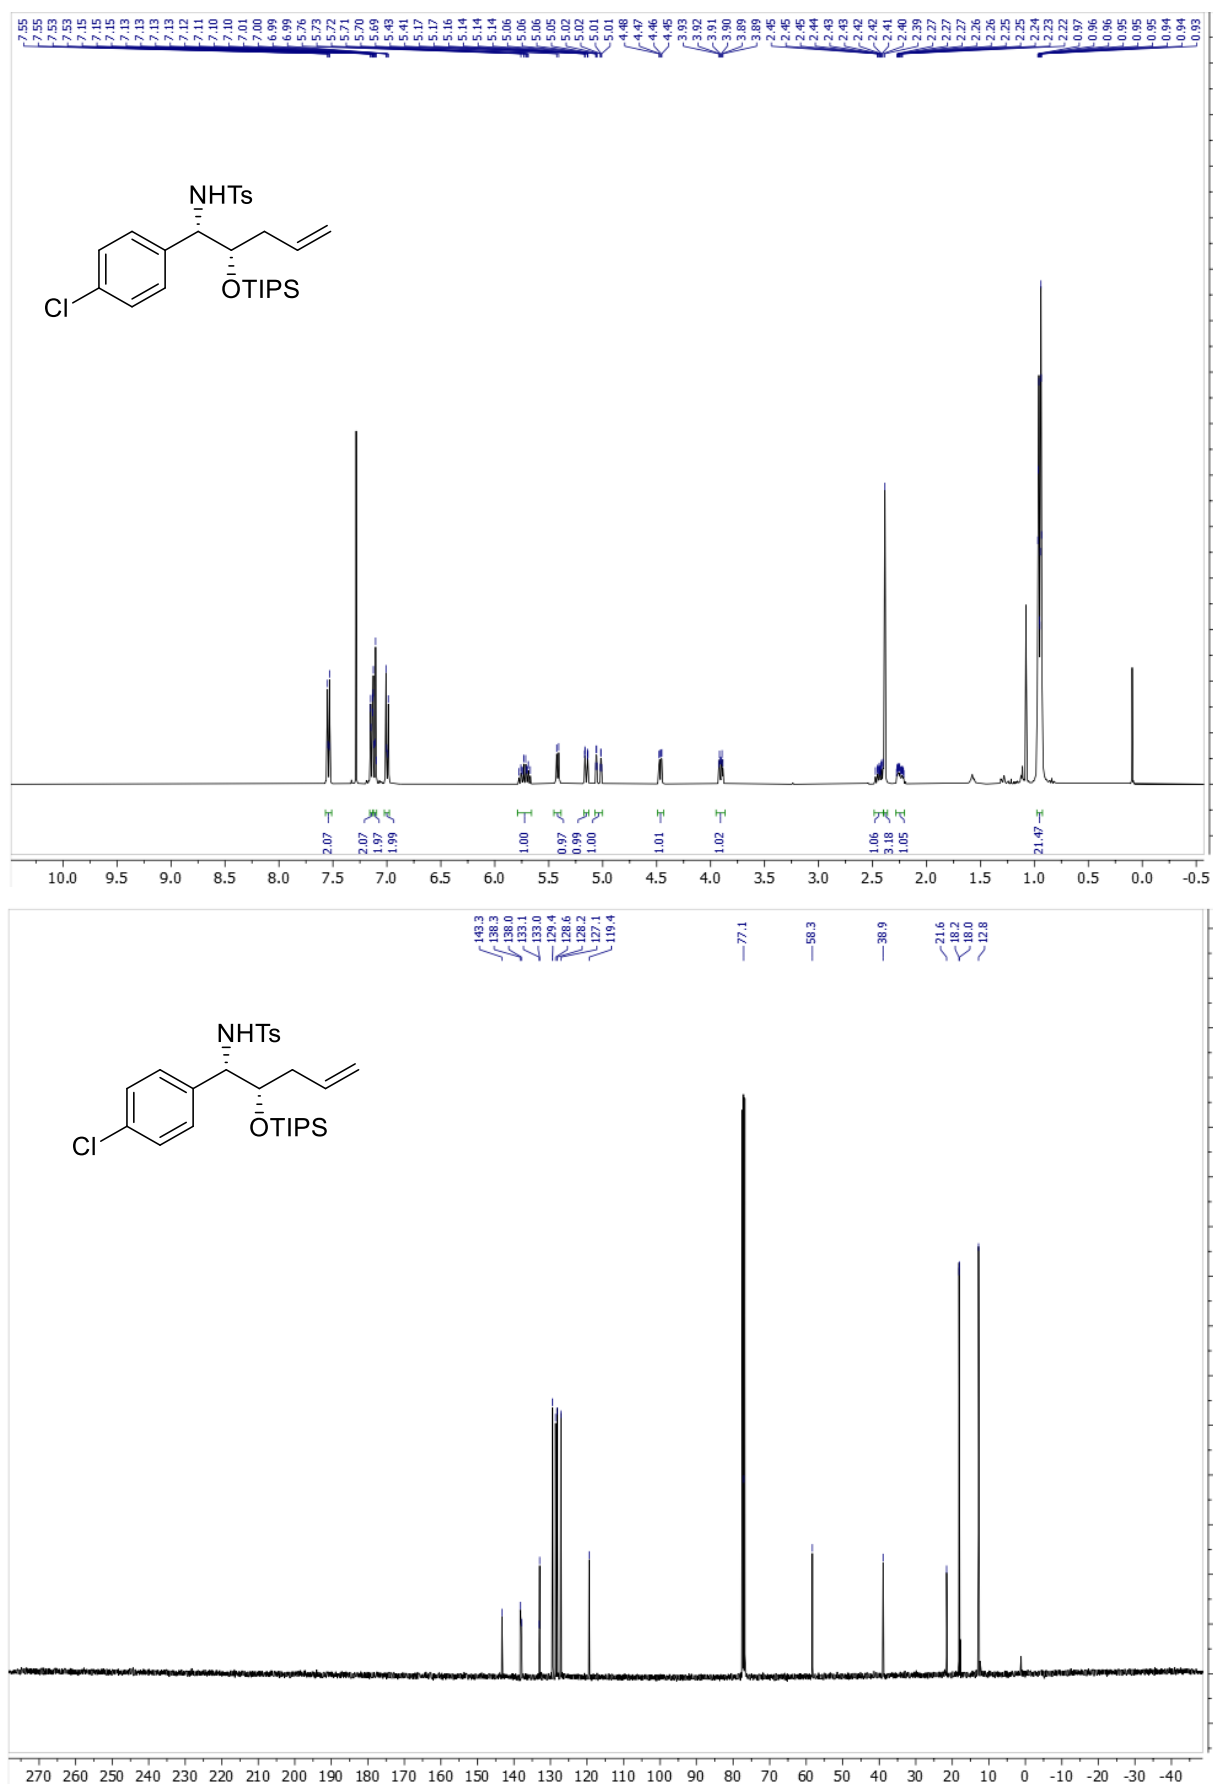

$^1\text{H}$  NMR (400 MHz,  $\text{CDCl}_3$ ; top) and  $^{13}\text{C}$  NMR (101 MHz,  $\text{CDCl}_3$ ; bottom) of compound **13e**

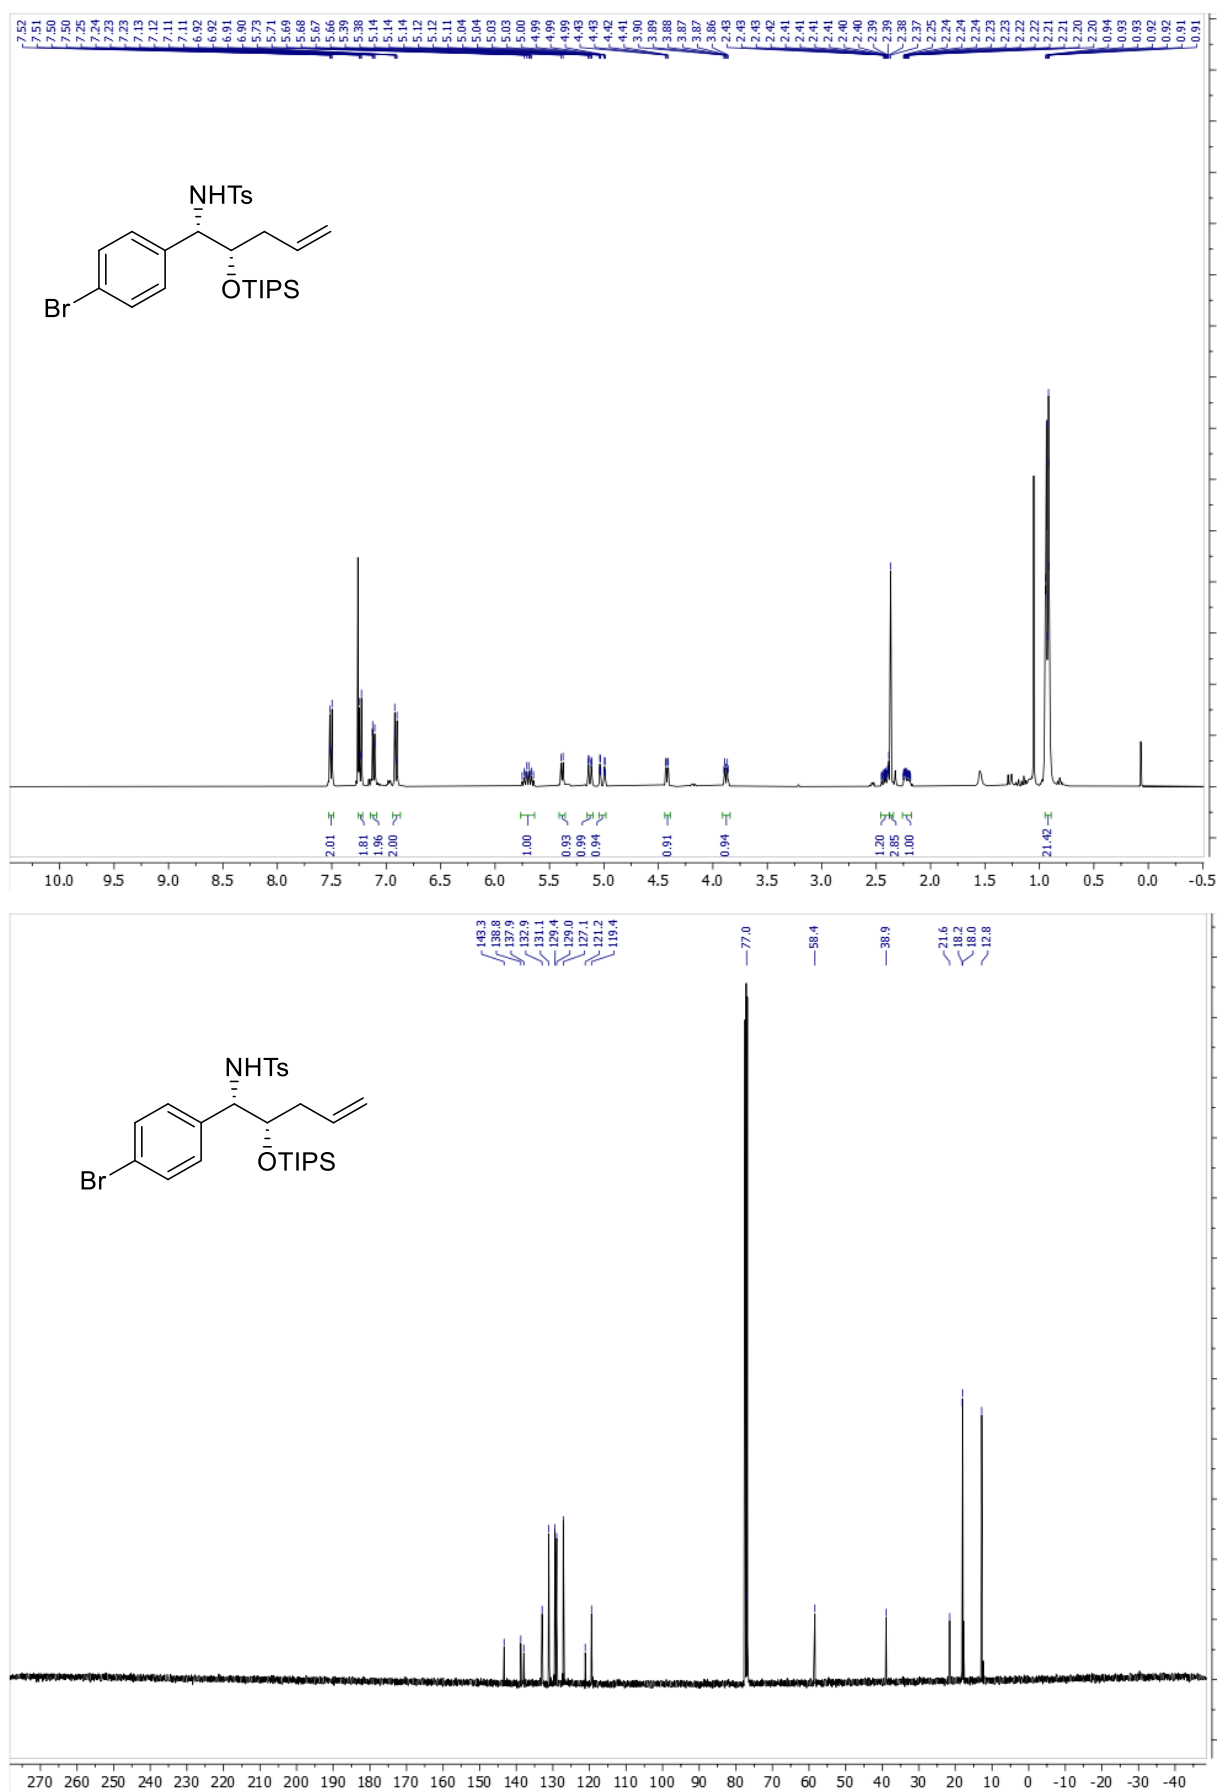

$^1\text{H}$  NMR (400 MHz,  $\text{CDCl}_3$ ; top) and  $^{13}\text{C}$  NMR (101 MHz,  $\text{CDCl}_3$ ; bottom) of compound **13f**

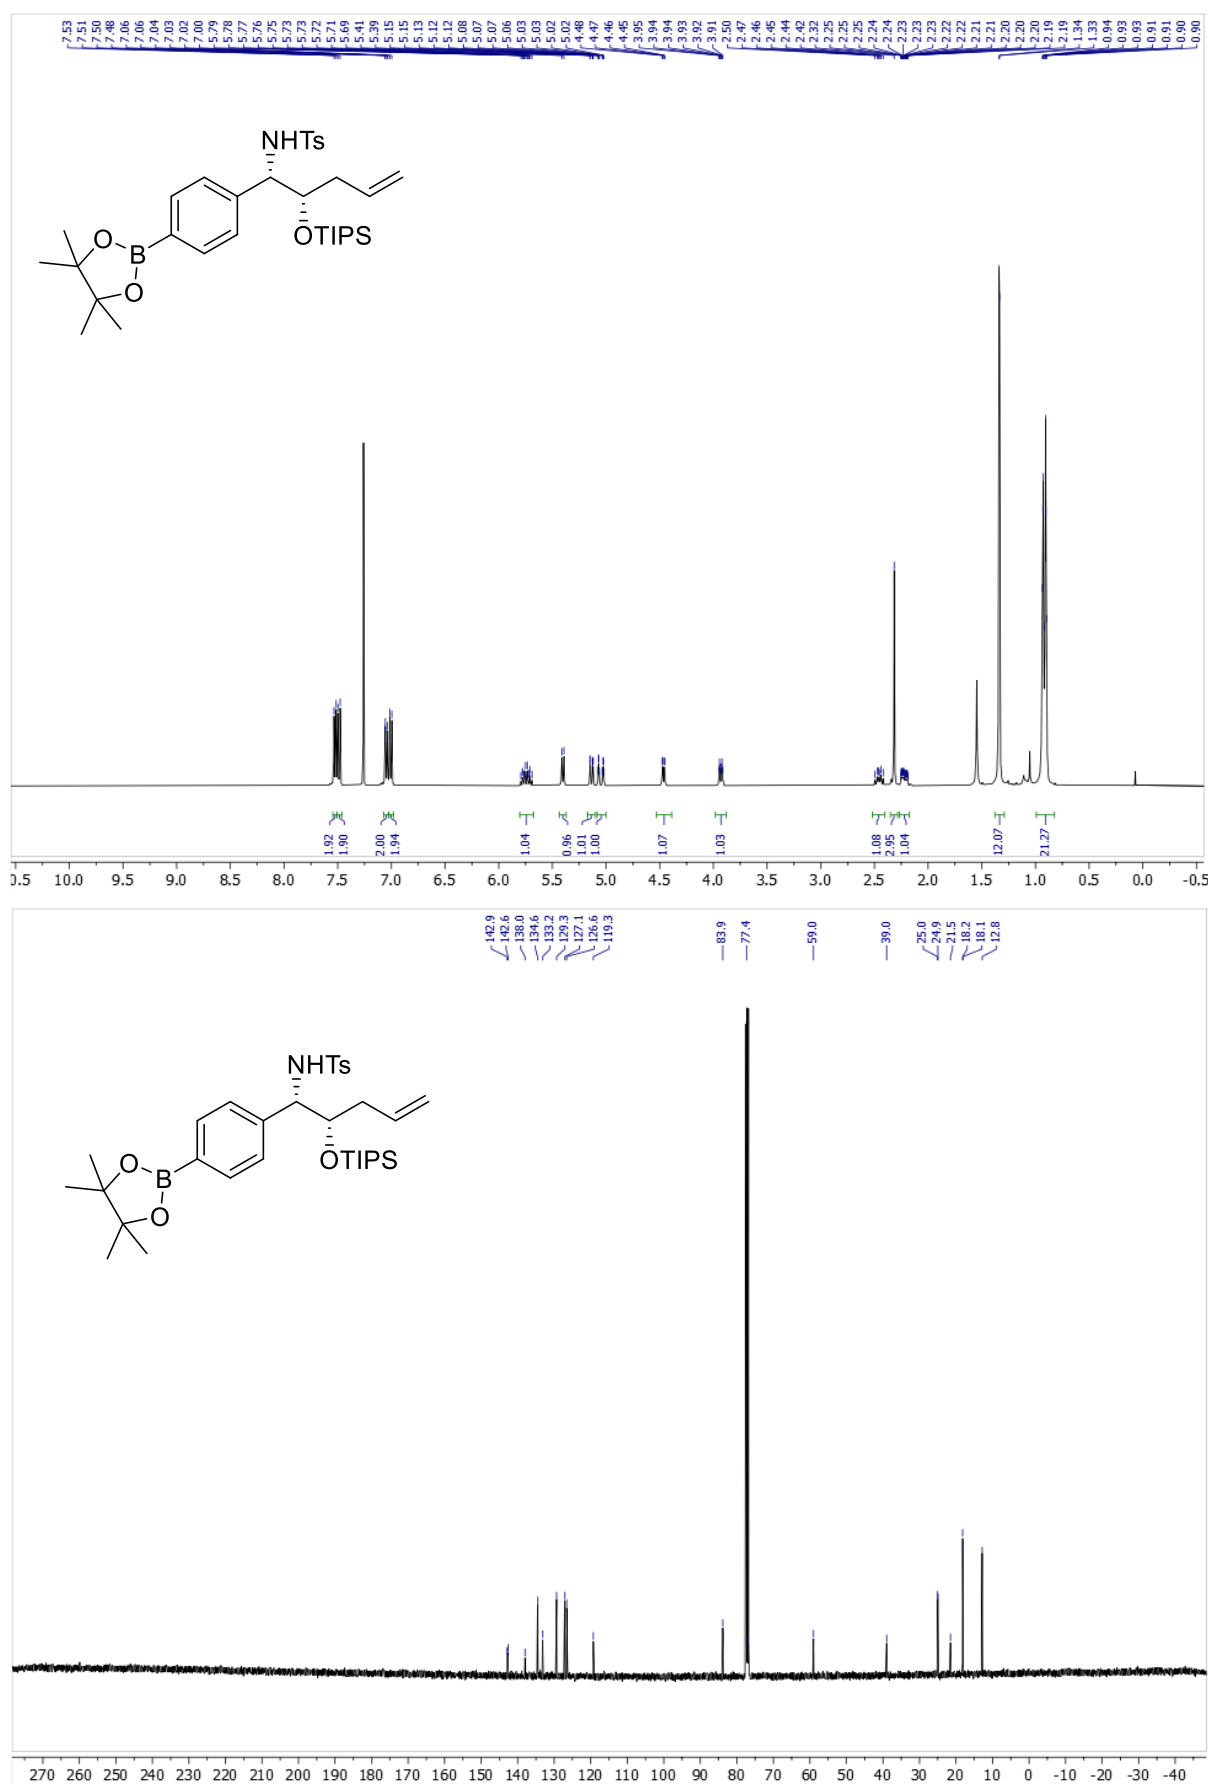

$^1\text{H}$  NMR (400 MHz,  $\text{CDCl}_3$ ; top) and  $^{13}\text{C}$  NMR (101 MHz,  $\text{CDCl}_3$ ; bottom) of compound **14**

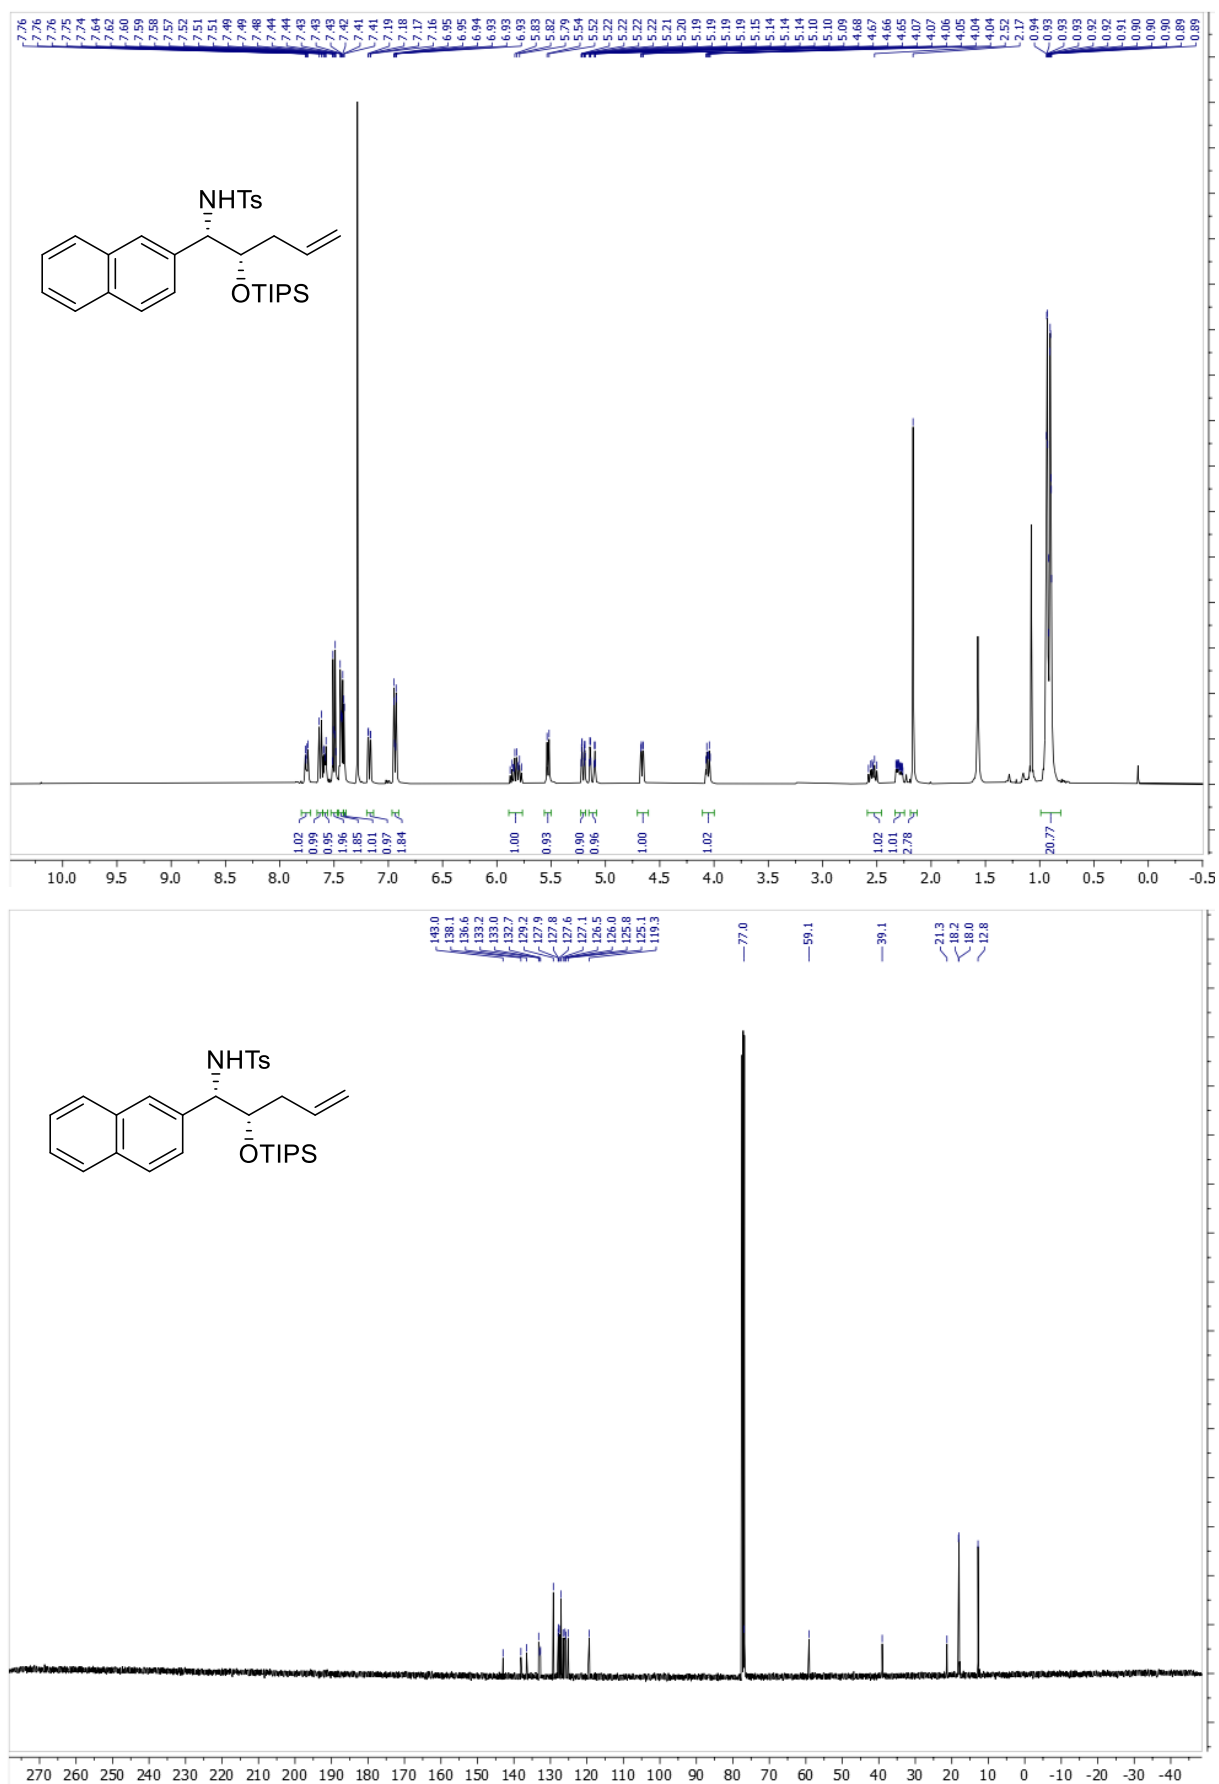

<sup>1</sup>H NMR (400 MHz, CDCl<sub>3</sub>; top) and <sup>13</sup>C NMR (101 MHz, CDCl<sub>3</sub>; bottom) of compound **15**

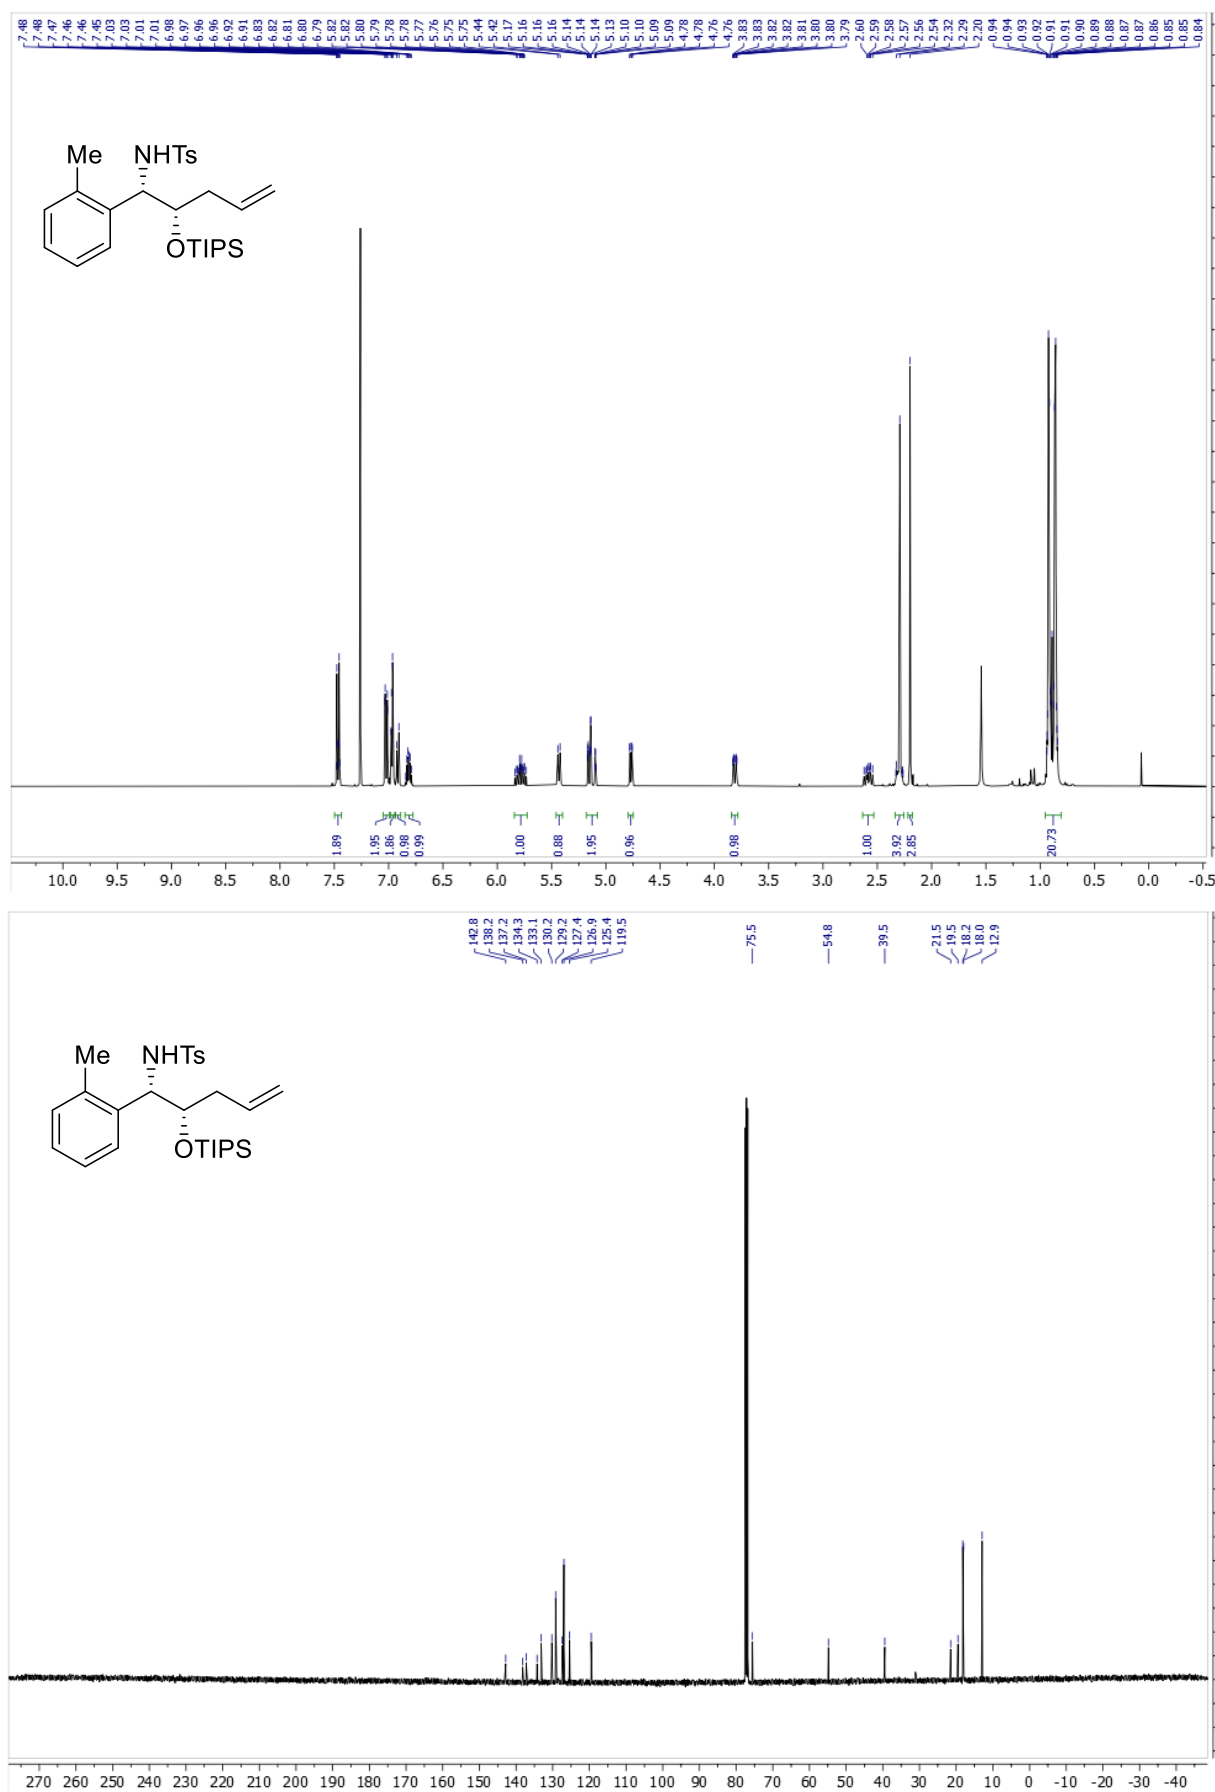

$^1\text{H}$  NMR (400 MHz,  $\text{CDCl}_3$ ; top) and  $^{13}\text{C}$  NMR (101 MHz,  $\text{CDCl}_3$ ; bottom) of compound **16**

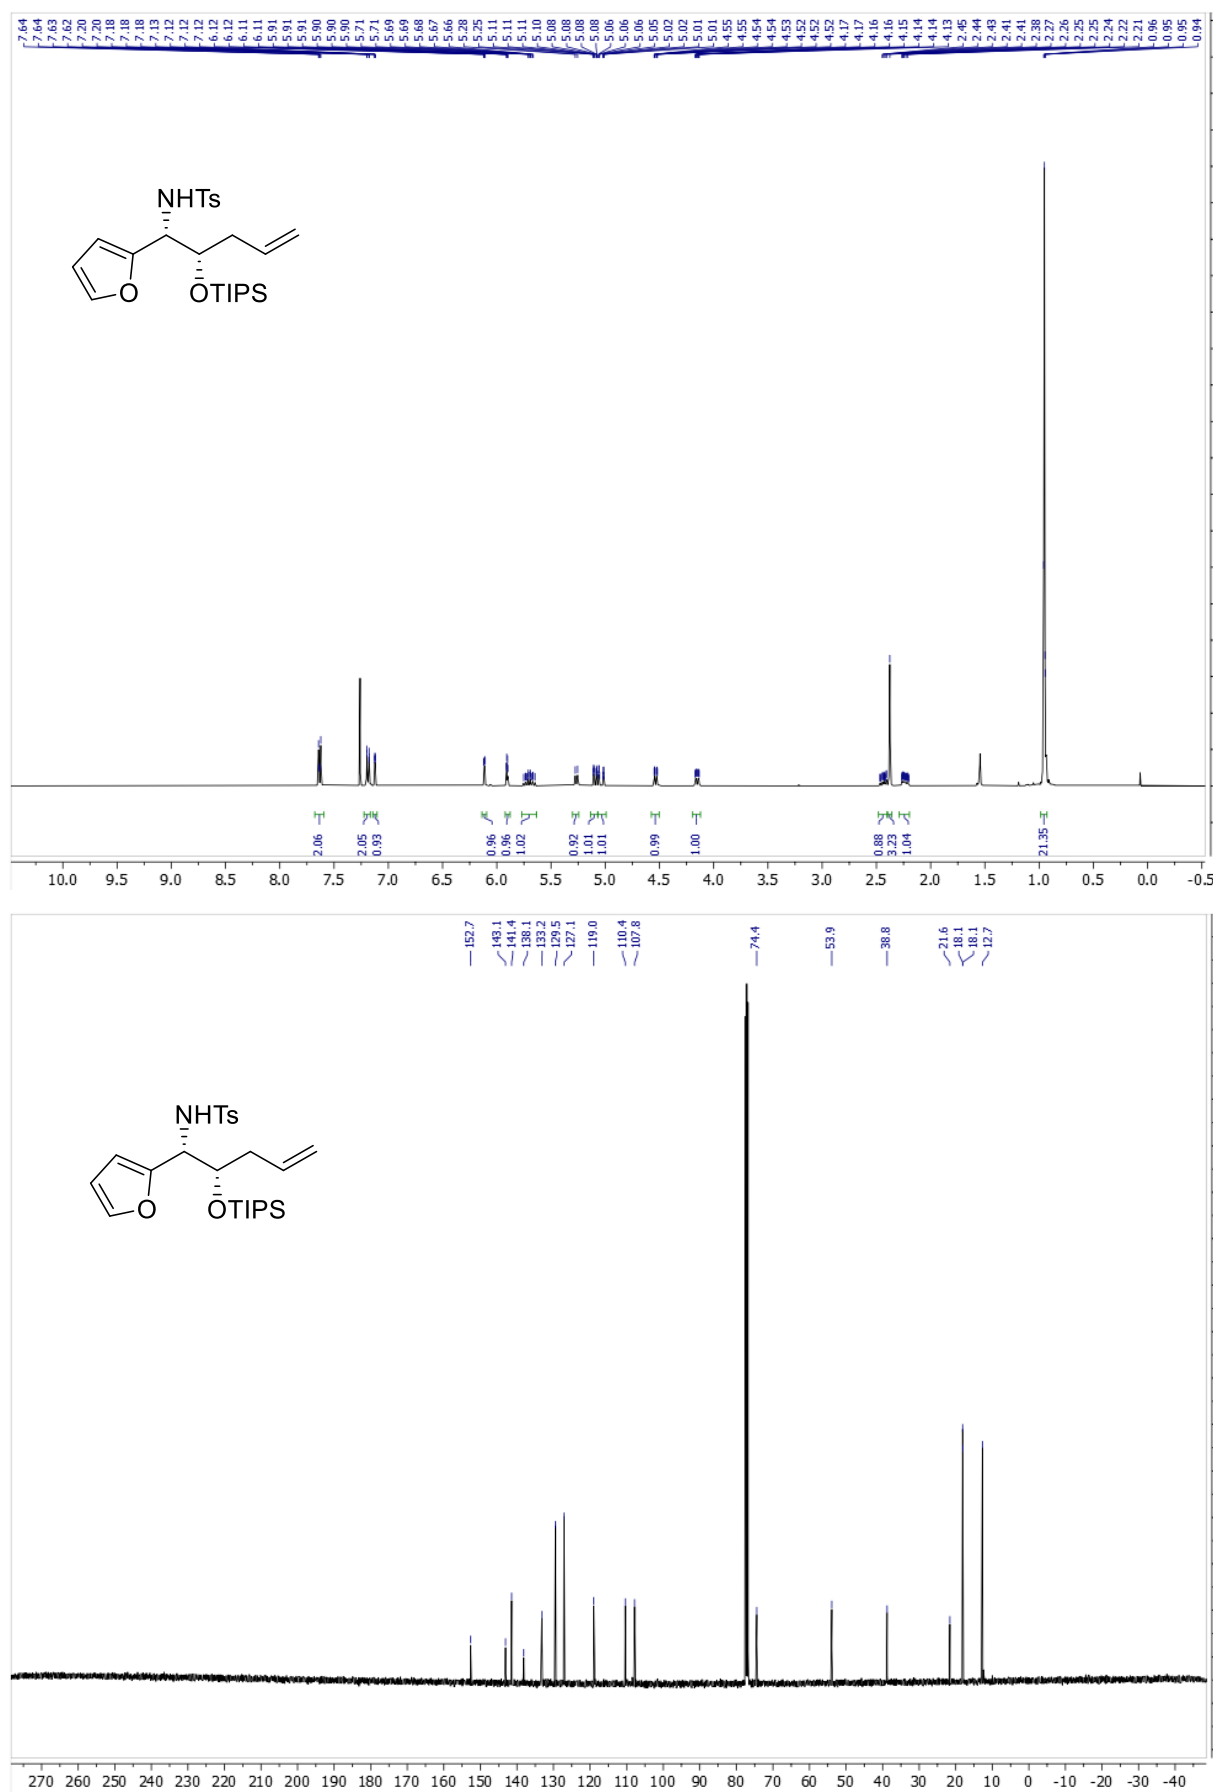

$^1\text{H}$  NMR (400 MHz,  $\text{CDCl}_3$ ; top) and  $^{13}\text{C}$  NMR (101 MHz,  $\text{CDCl}_3$ ; bottom) of compound **17**

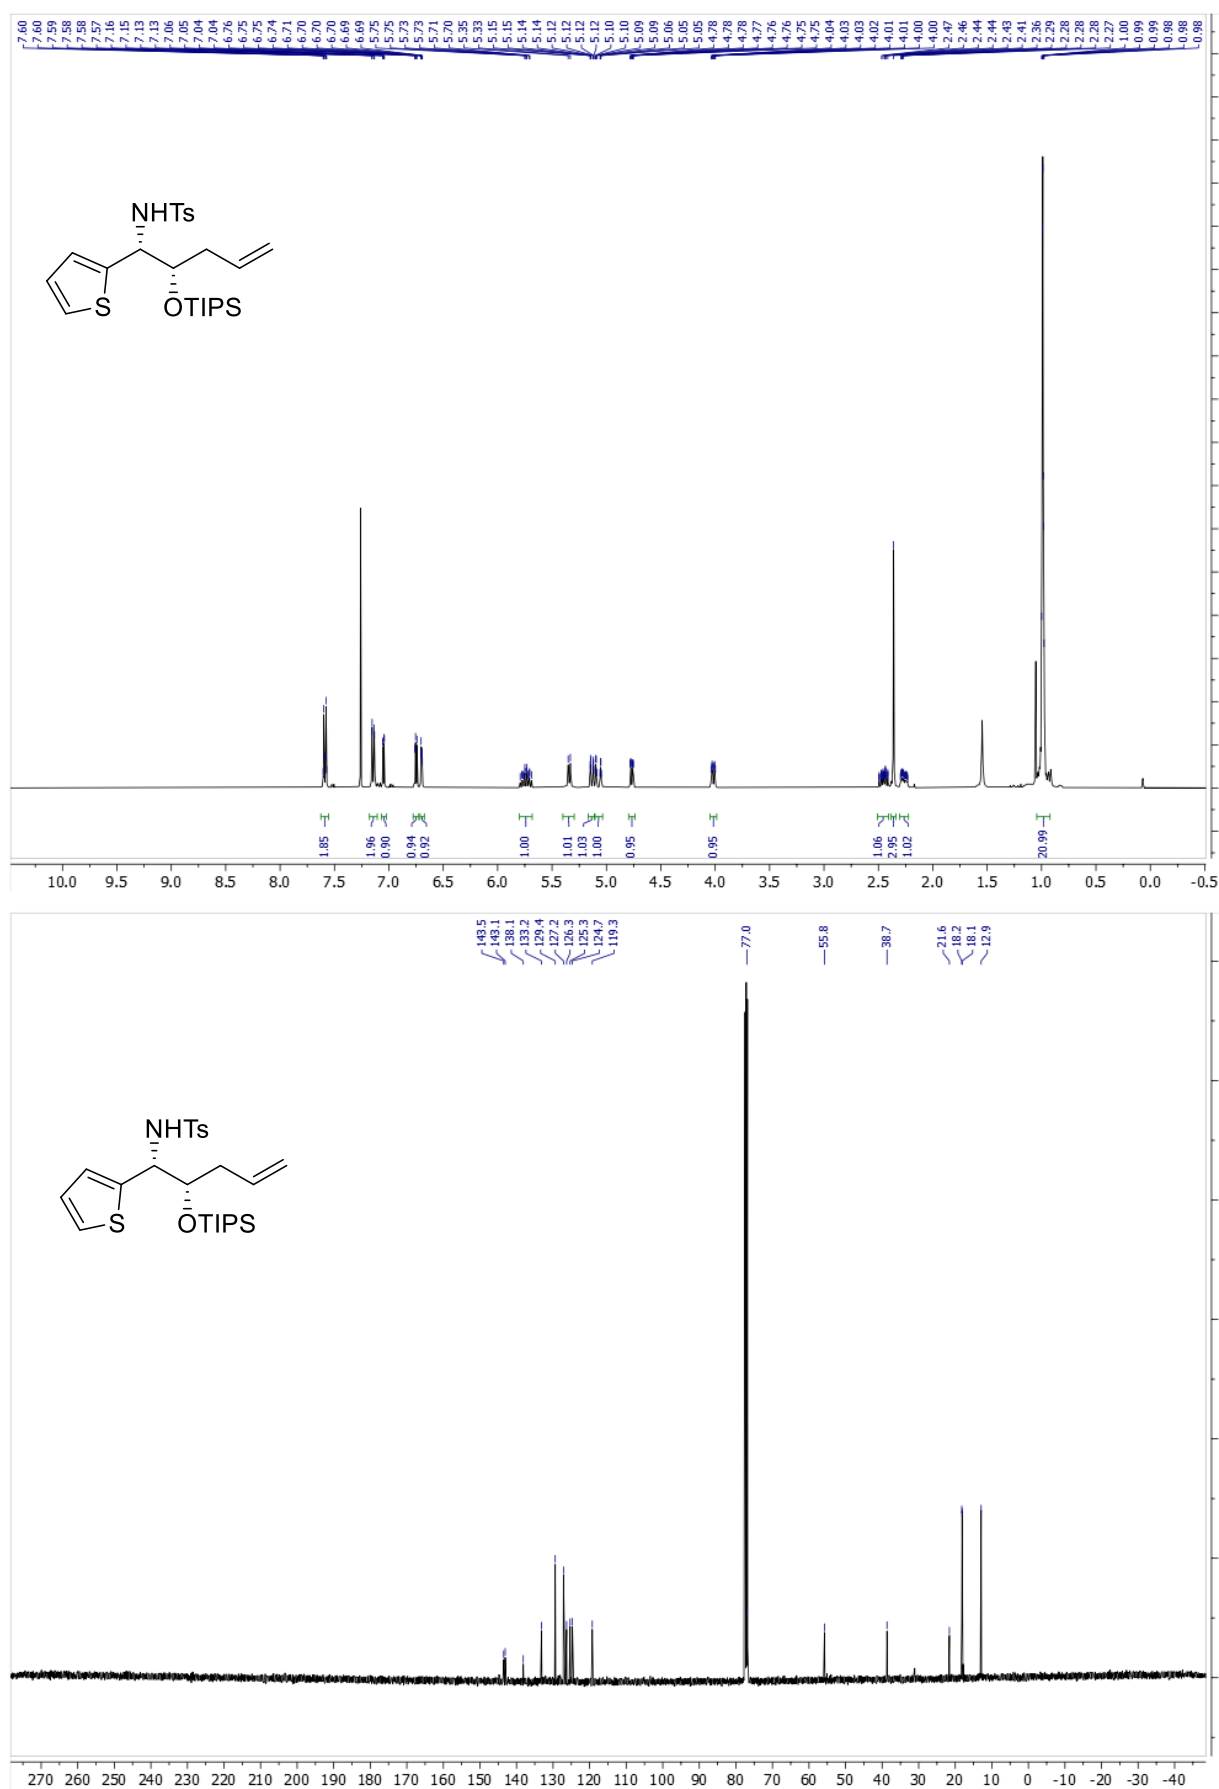



$^1\text{H}$  NMR (400 MHz,  $\text{CDCl}_3$ ; top) and  $^{13}\text{C}$  NMR (101 MHz,  $\text{CDCl}_3$ ; bottom) of compound **18**

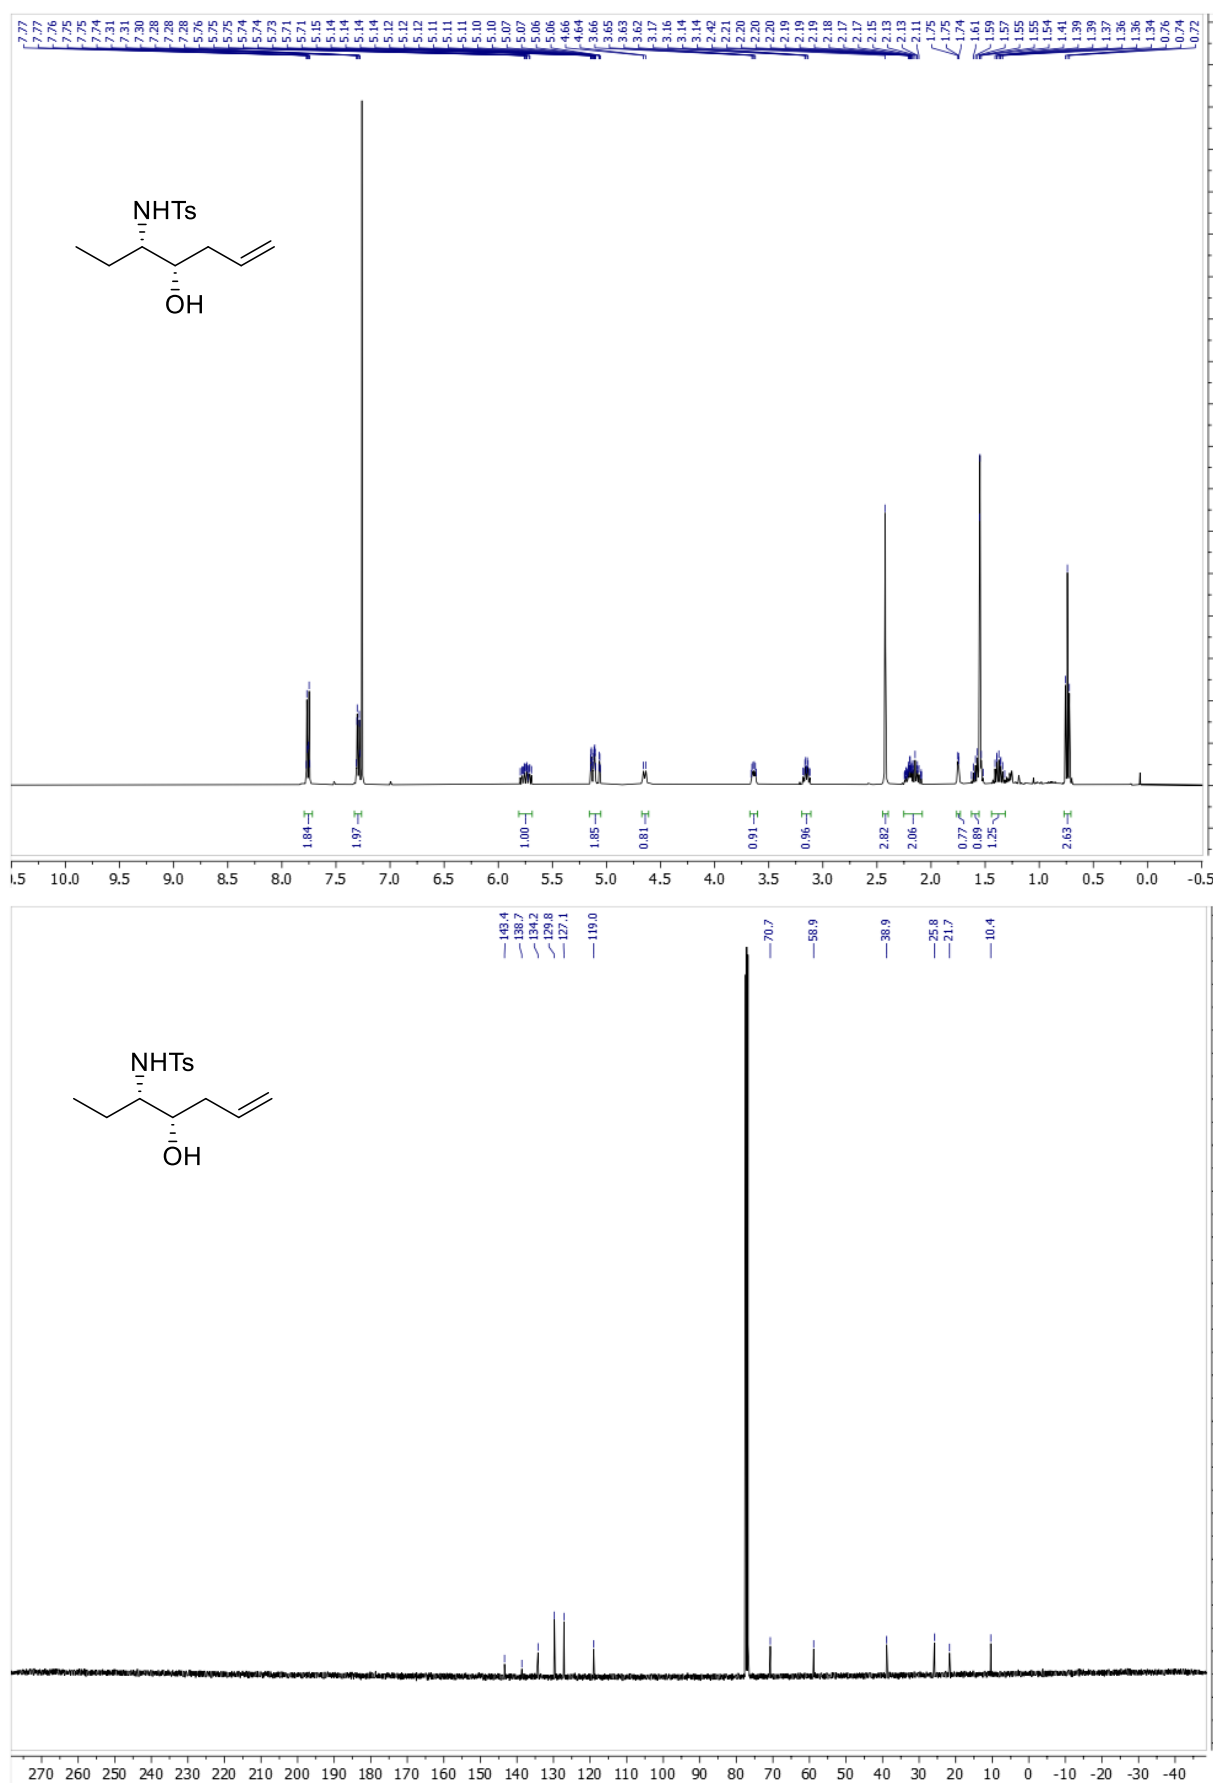

$^1\text{H}$  NMR (400 MHz,  $\text{CDCl}_3$ ; top) and  $^{13}\text{C}$  NMR (101 MHz,  $\text{CDCl}_3$ ; bottom) of compound **19**

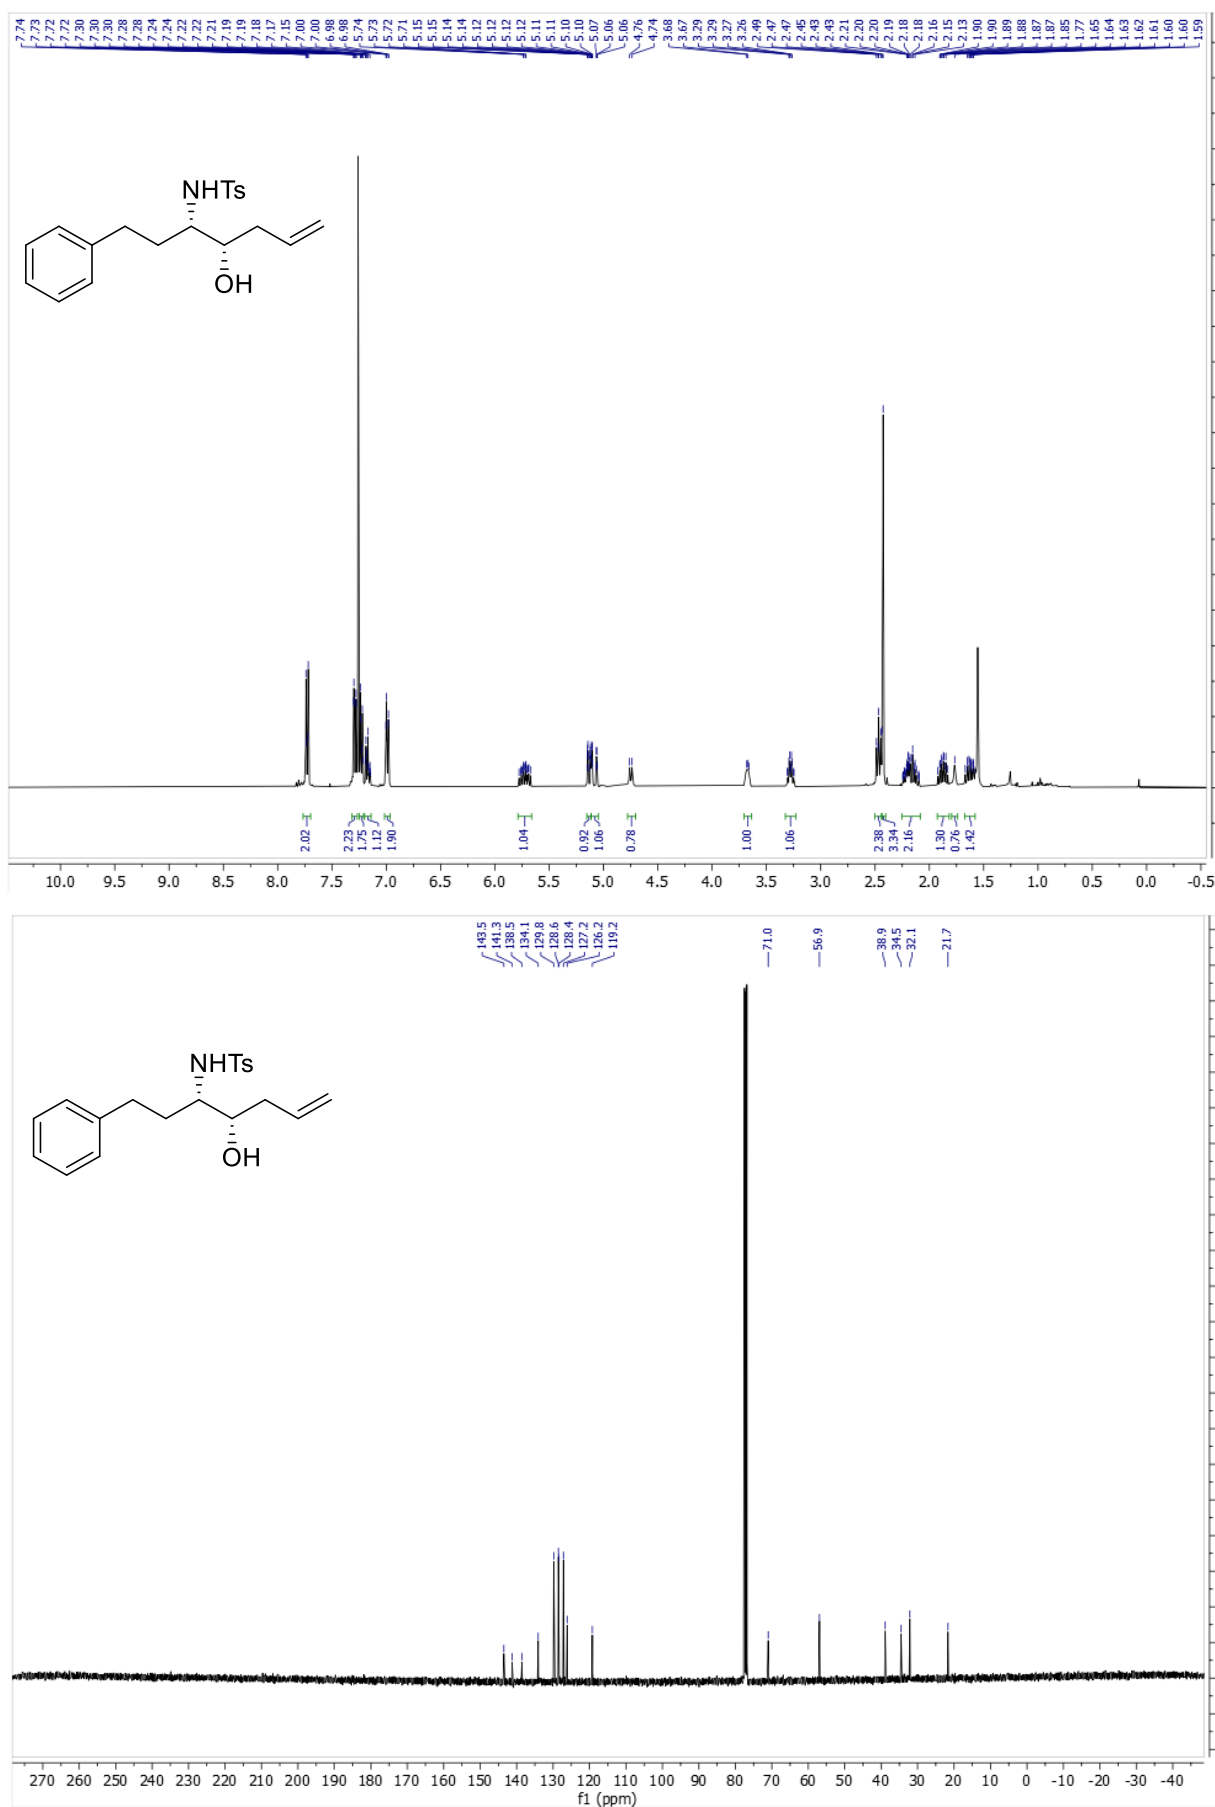

$^1\text{H}$  NMR (400 MHz,  $\text{CDCl}_3$ ; top) and  $^{13}\text{C}$  NMR (101 MHz,  $\text{CDCl}_3$ ; bottom) of compound **20**

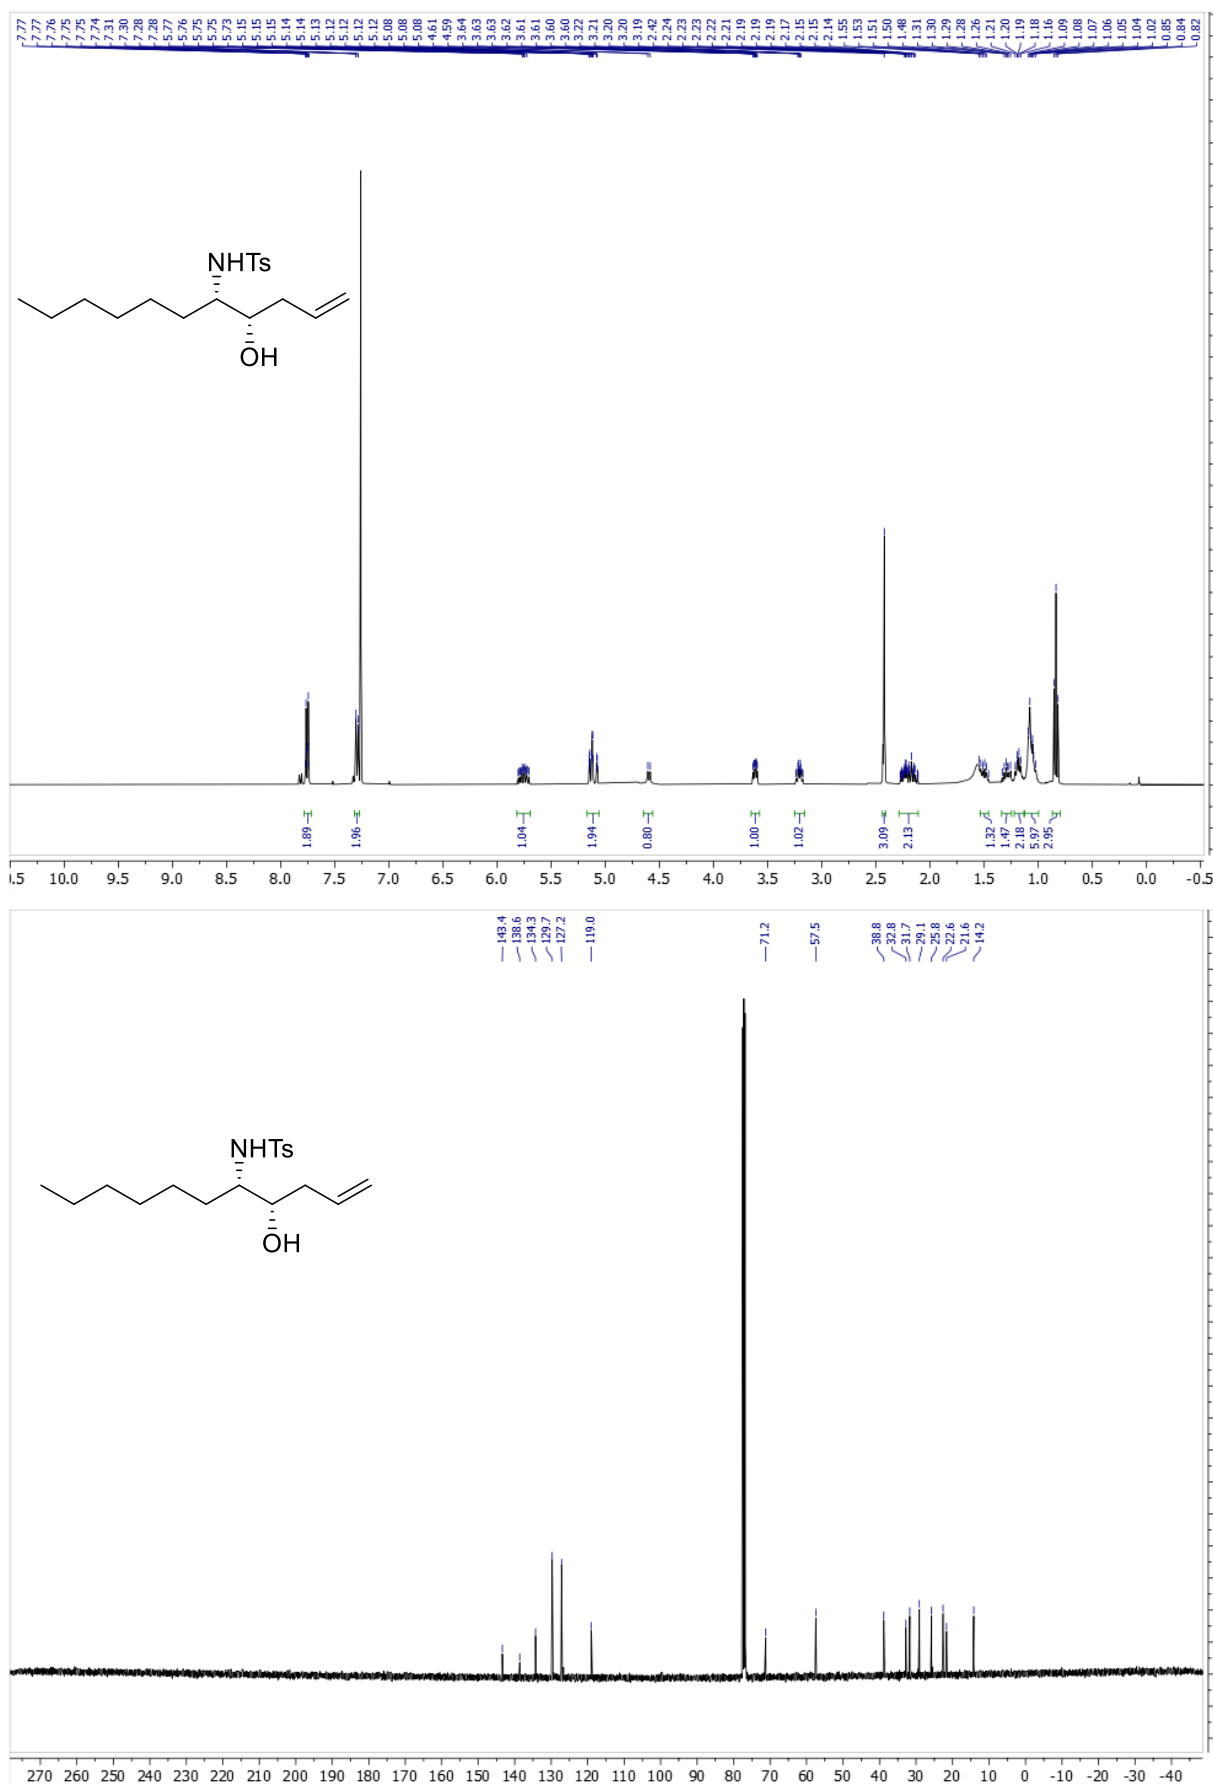

$^1\text{H}$  NMR (400 MHz,  $\text{CDCl}_3$ ; top) and  $^{13}\text{C}$  NMR (101 MHz,  $\text{CDCl}_3$ ; bottom) of compound **21**

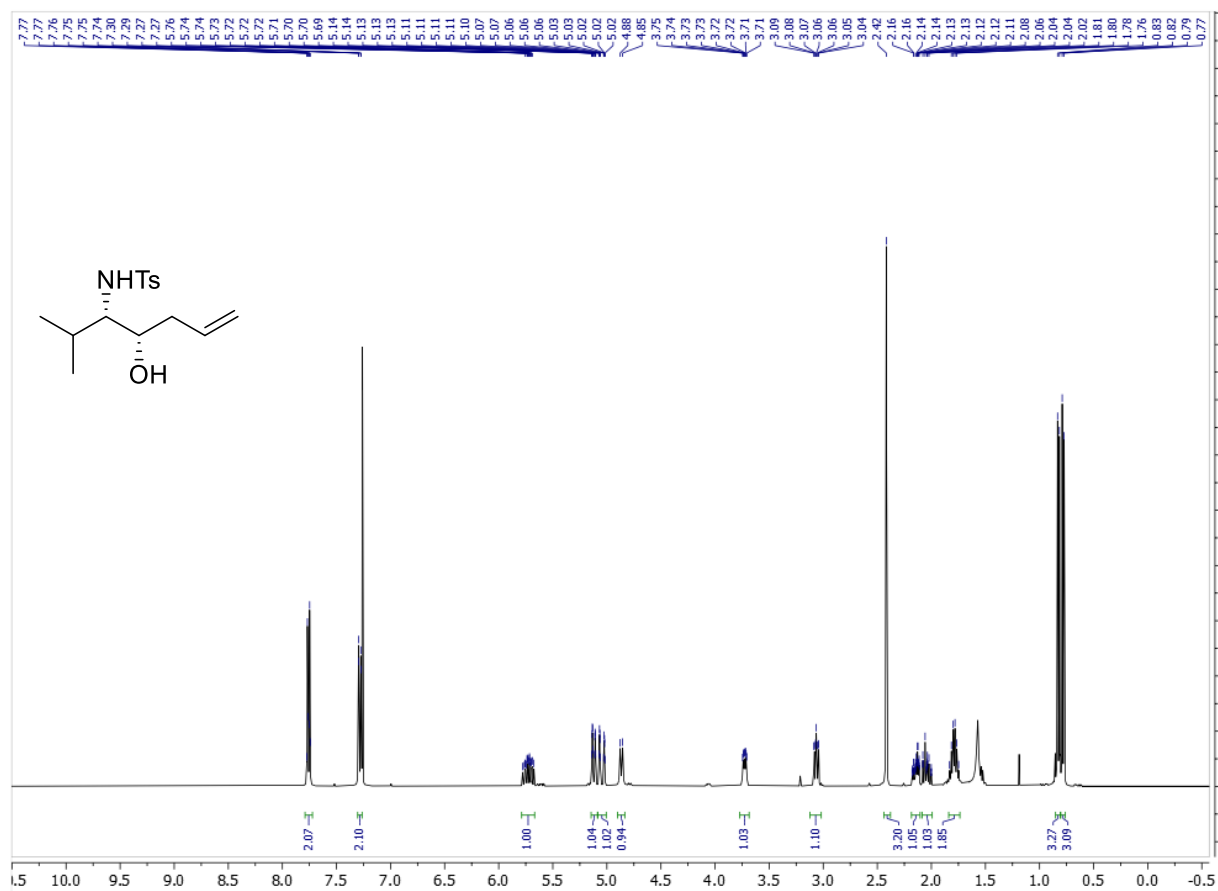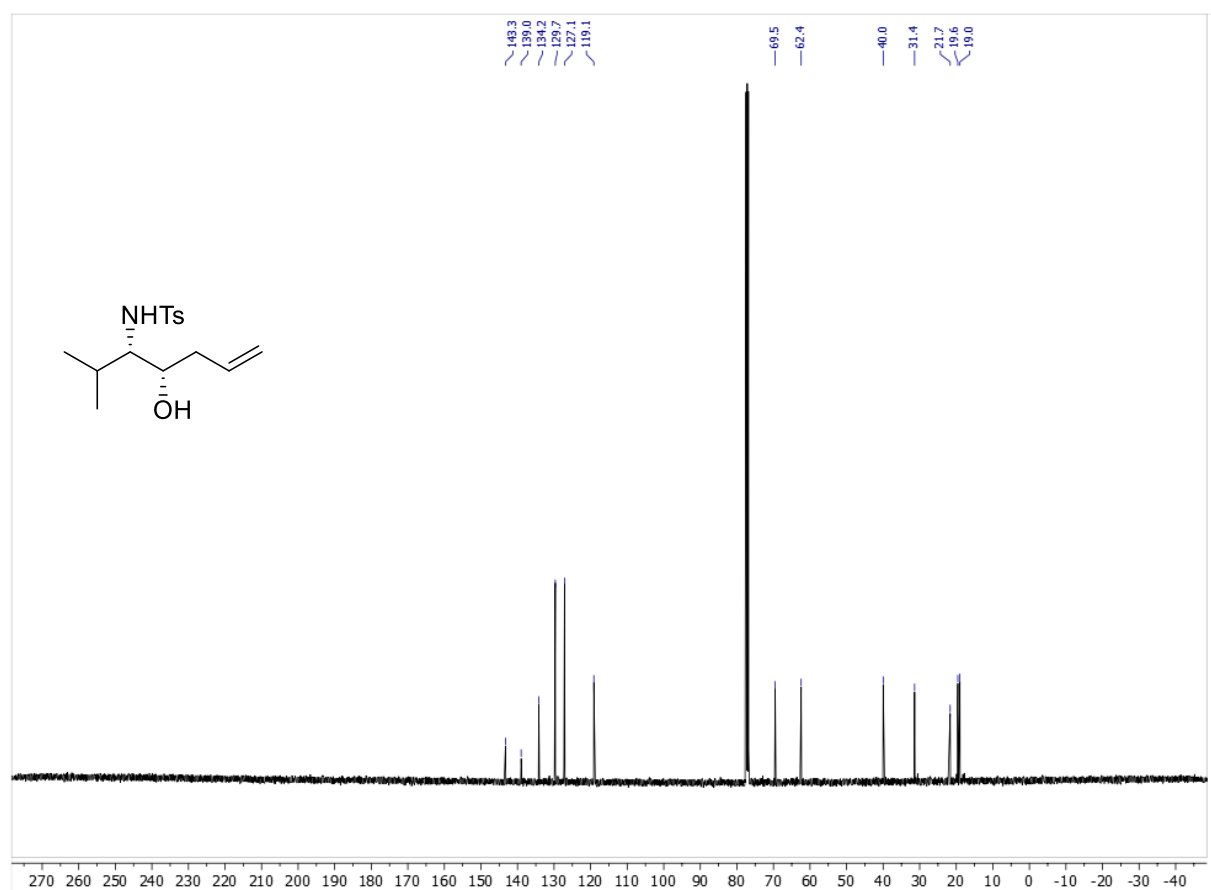

$^1\text{H}$  NMR (400 MHz,  $\text{CDCl}_3$ ; top) and  $^{13}\text{C}$  NMR (101 MHz,  $\text{CDCl}_3$ ; bottom) of compound **22**

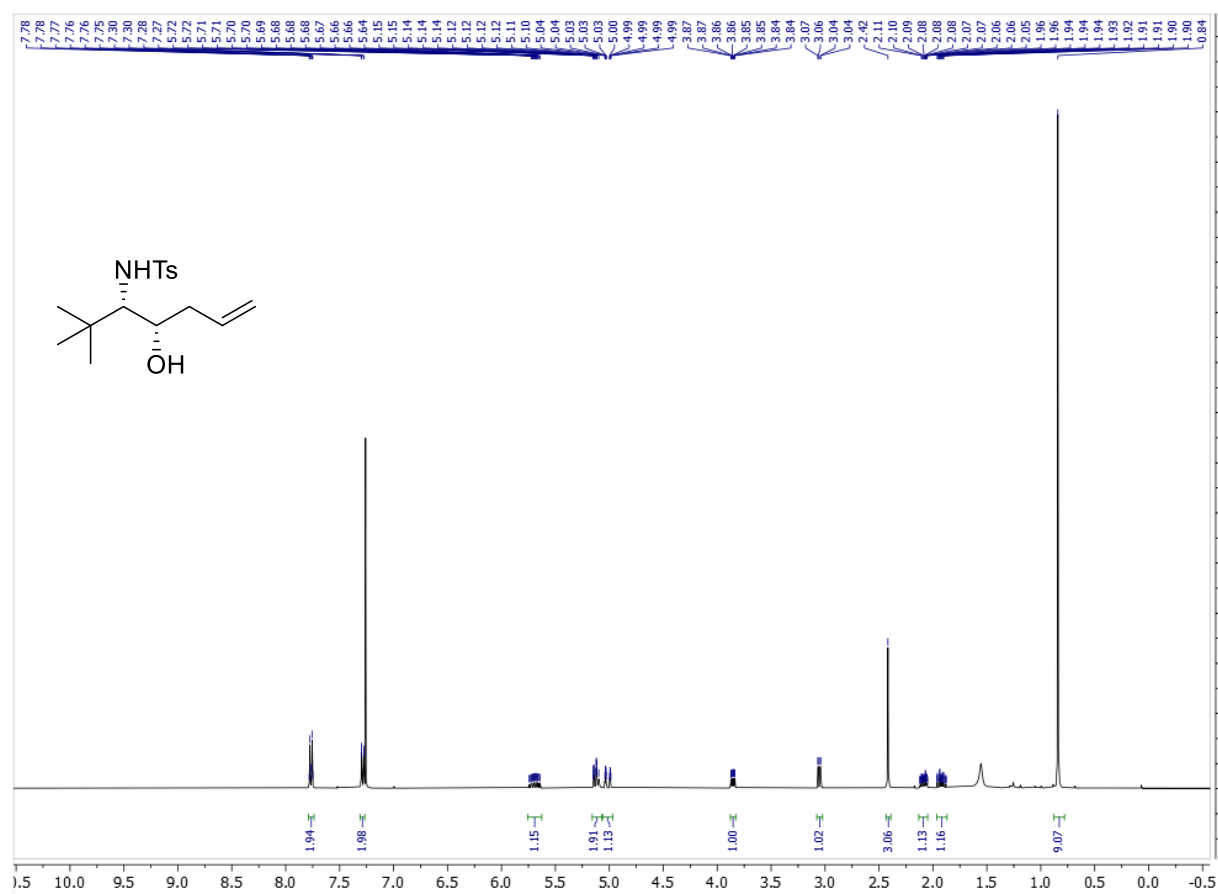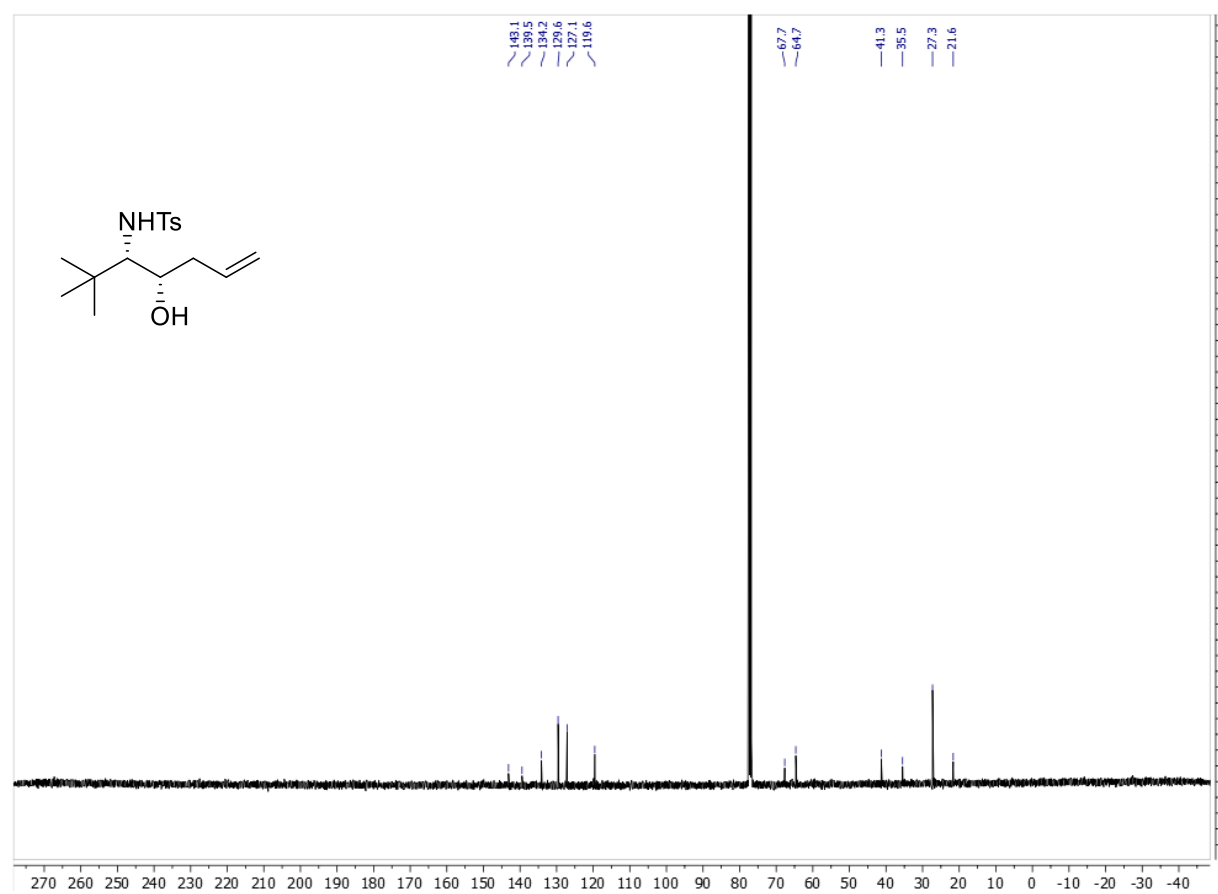

$^1\text{H}$  NMR (400 MHz,  $\text{CDCl}_3$ ; top) and  $^{13}\text{C}$  NMR (101 MHz,  $\text{CDCl}_3$ ; bottom) of compound **23**

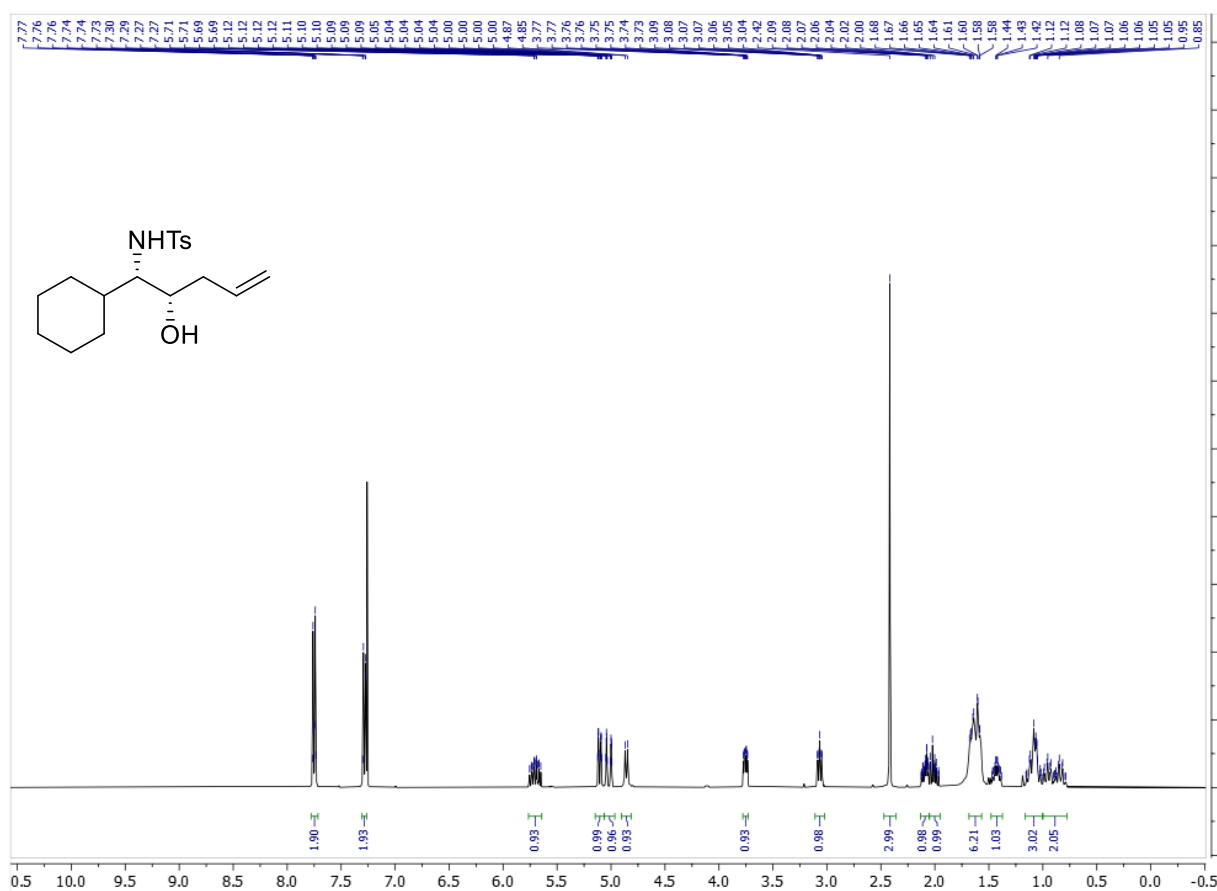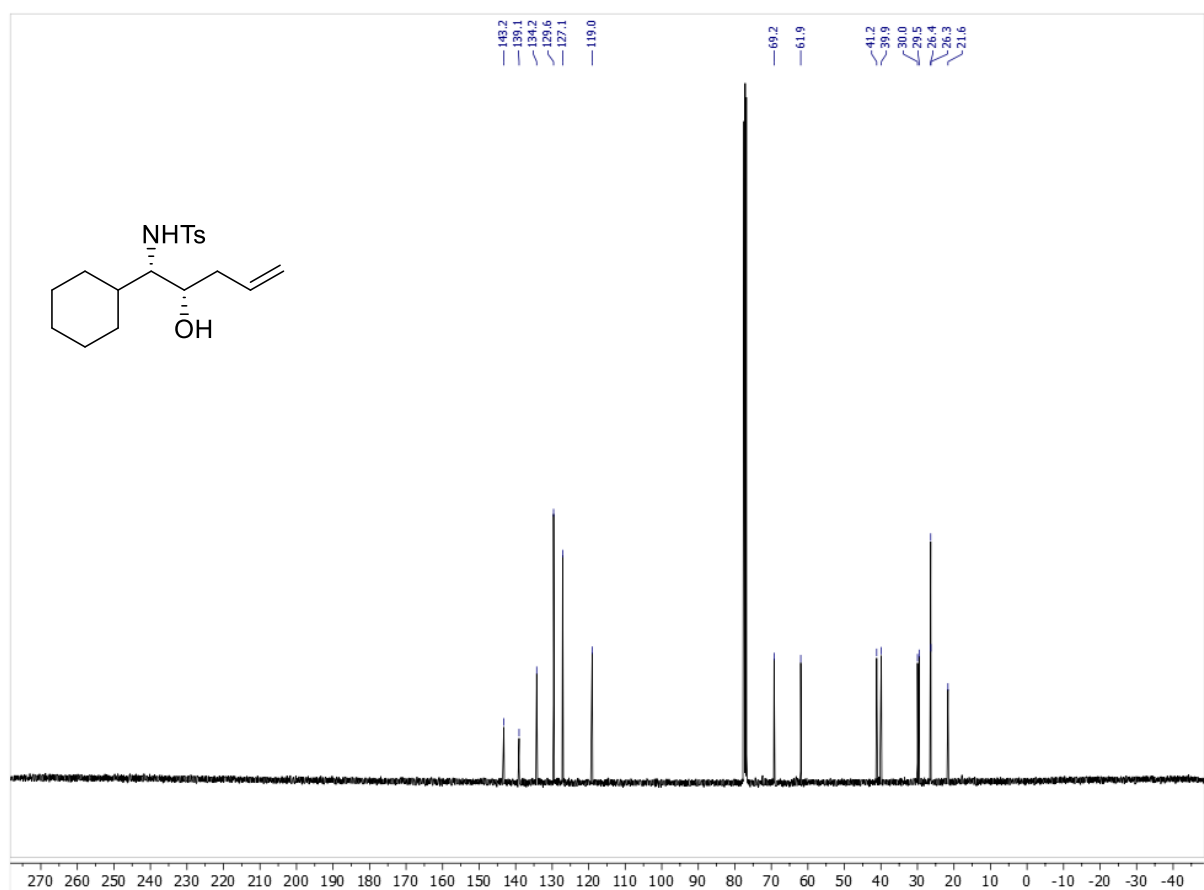

$^1\text{H}$  NMR (400 MHz,  $\text{CDCl}_3$ ; top) and  $^{13}\text{C}$  NMR (101 MHz,  $\text{CDCl}_3$ ; bottom) of compound **24**

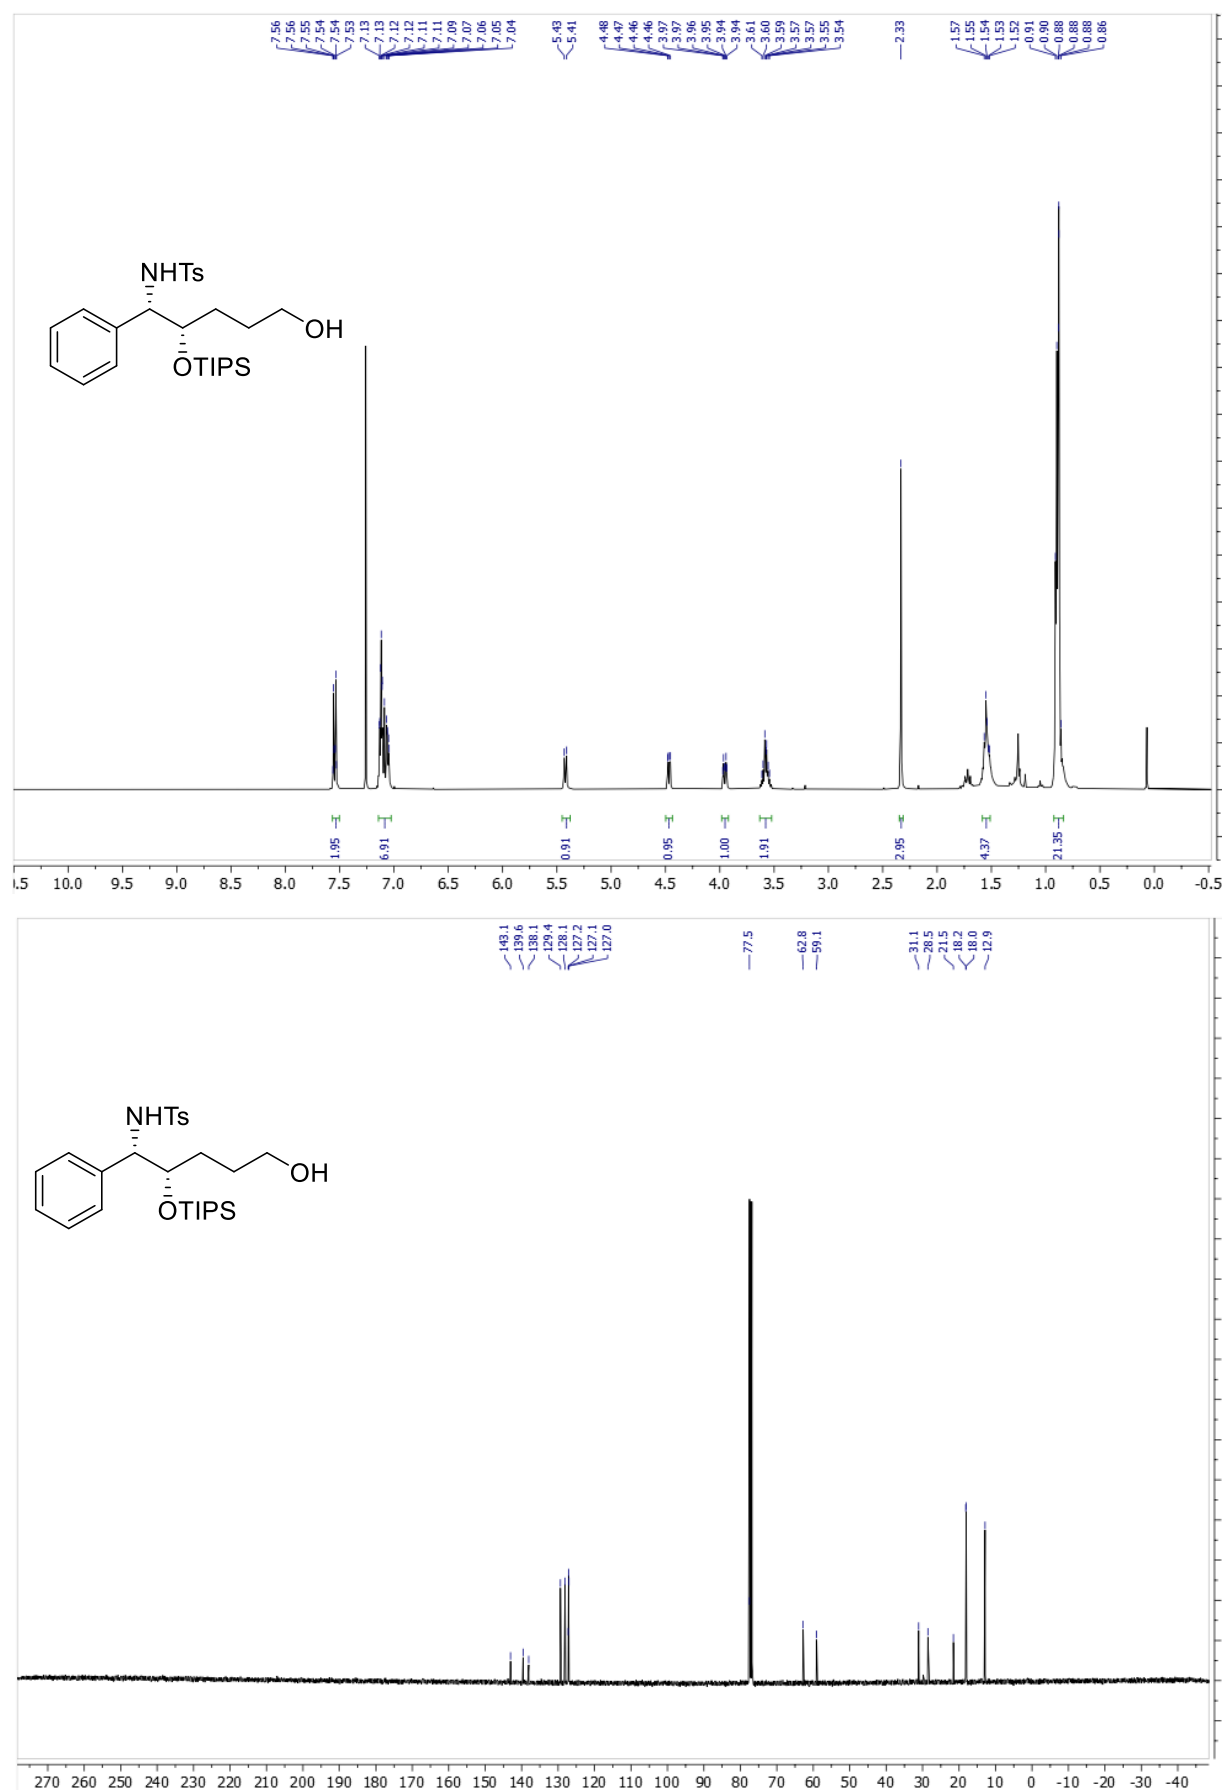

$^1\text{H}$  NMR (400 MHz,  $\text{CDCl}_3$ ; top) and  $^{13}\text{C}$  NMR (101 MHz,  $\text{CDCl}_3$ ; bottom) of compound **25**

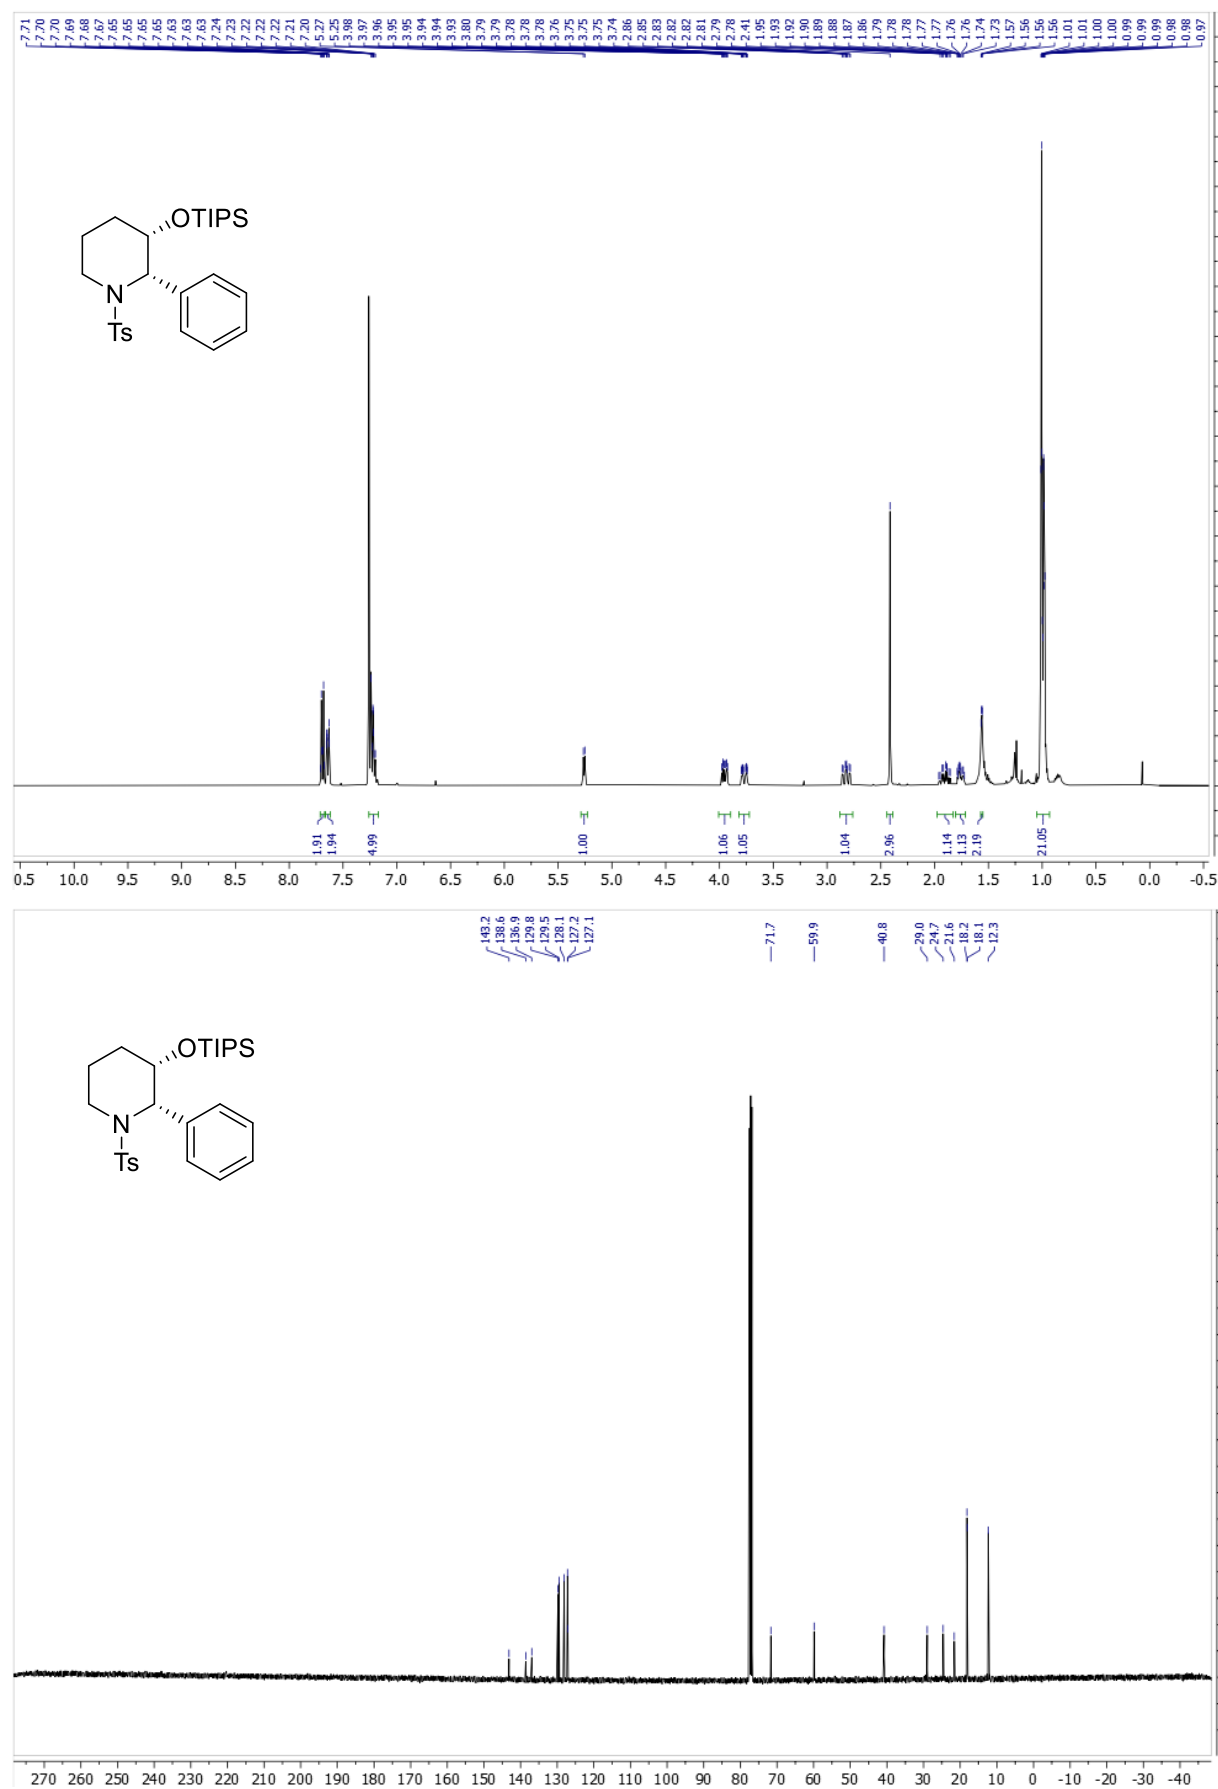



<sup>1</sup>H NMR (400 MHz, CDCl<sub>3</sub>; top) and <sup>13</sup>C NMR (101 MHz, CDCl<sub>3</sub>; bottom) of compound **26**

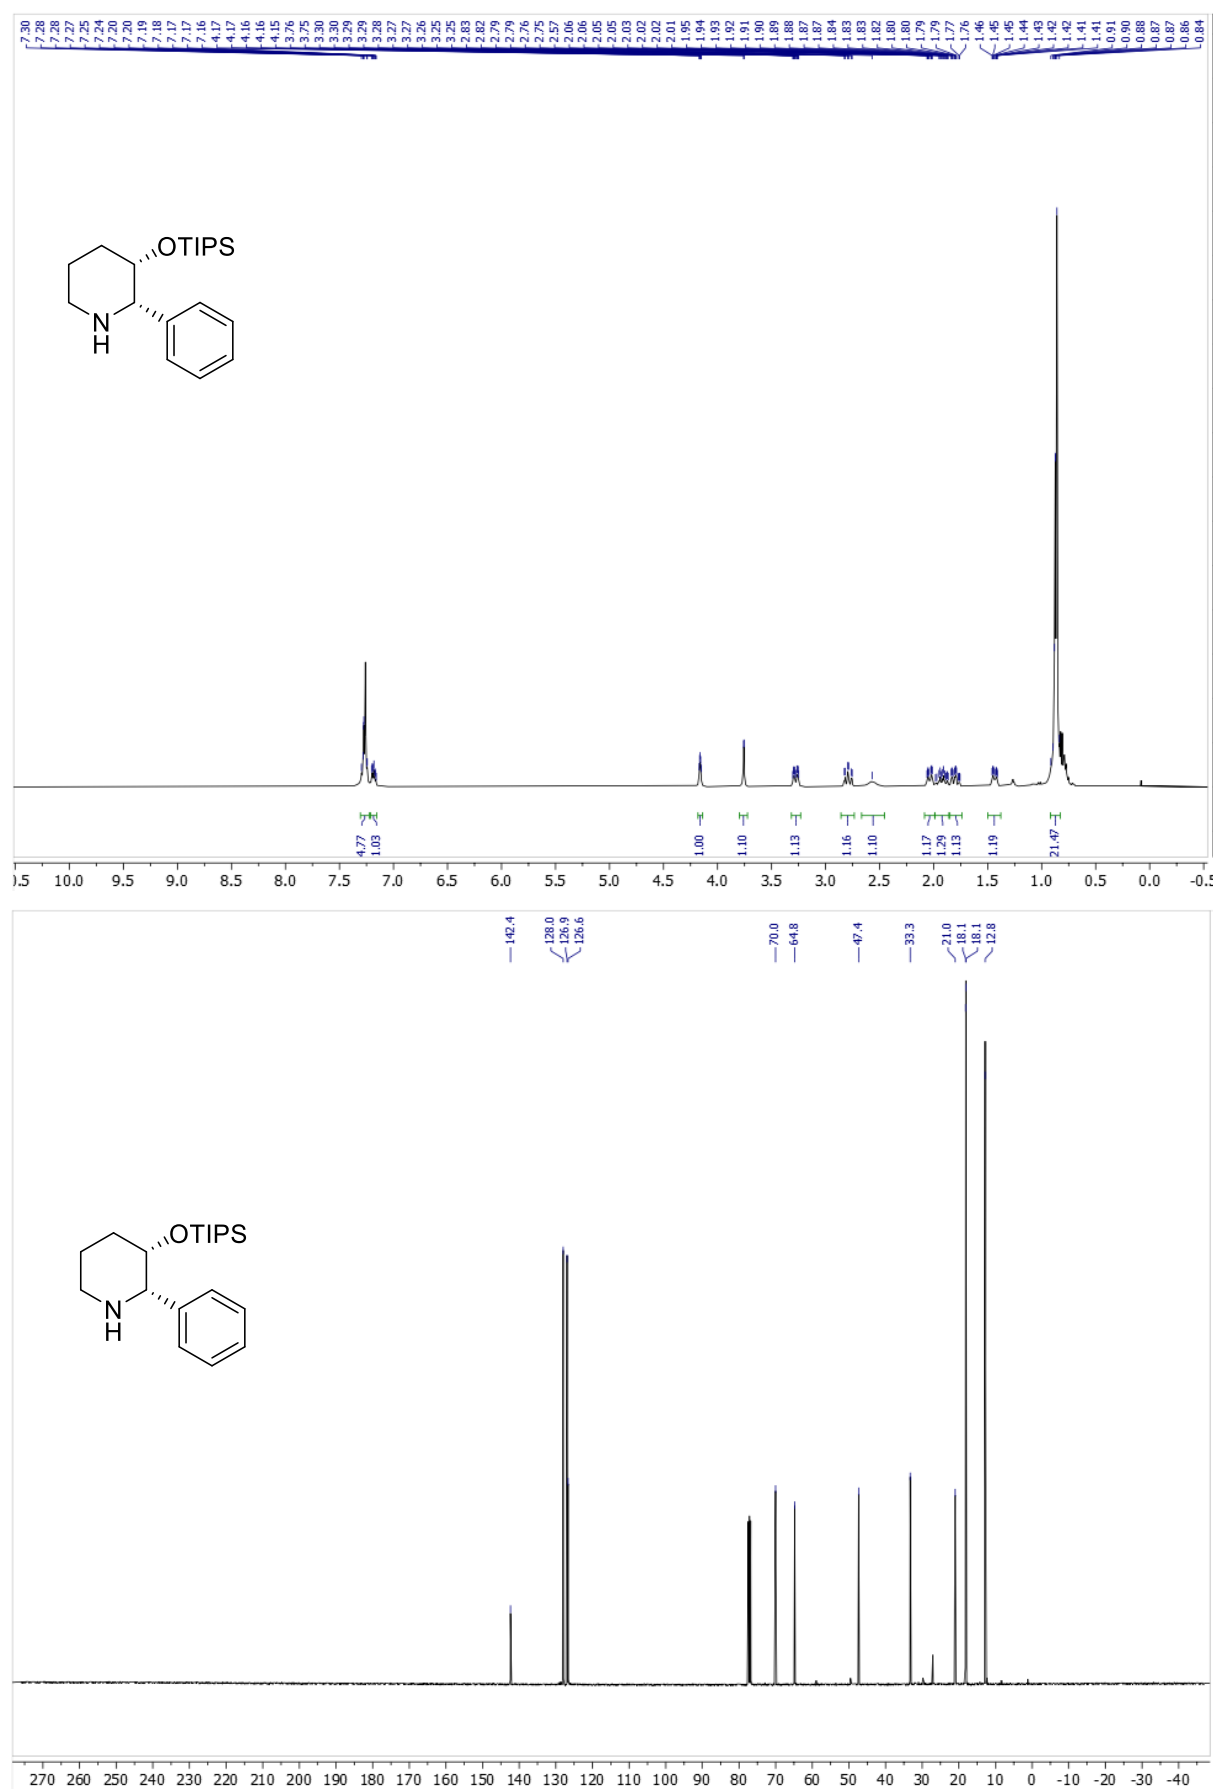

$^1\text{H}$  NMR (400 MHz,  $\text{CDCl}_3$ ; top) and  $^{13}\text{C}$  NMR (101 MHz,  $\text{CDCl}_3$ ; bottom) of compound **28**

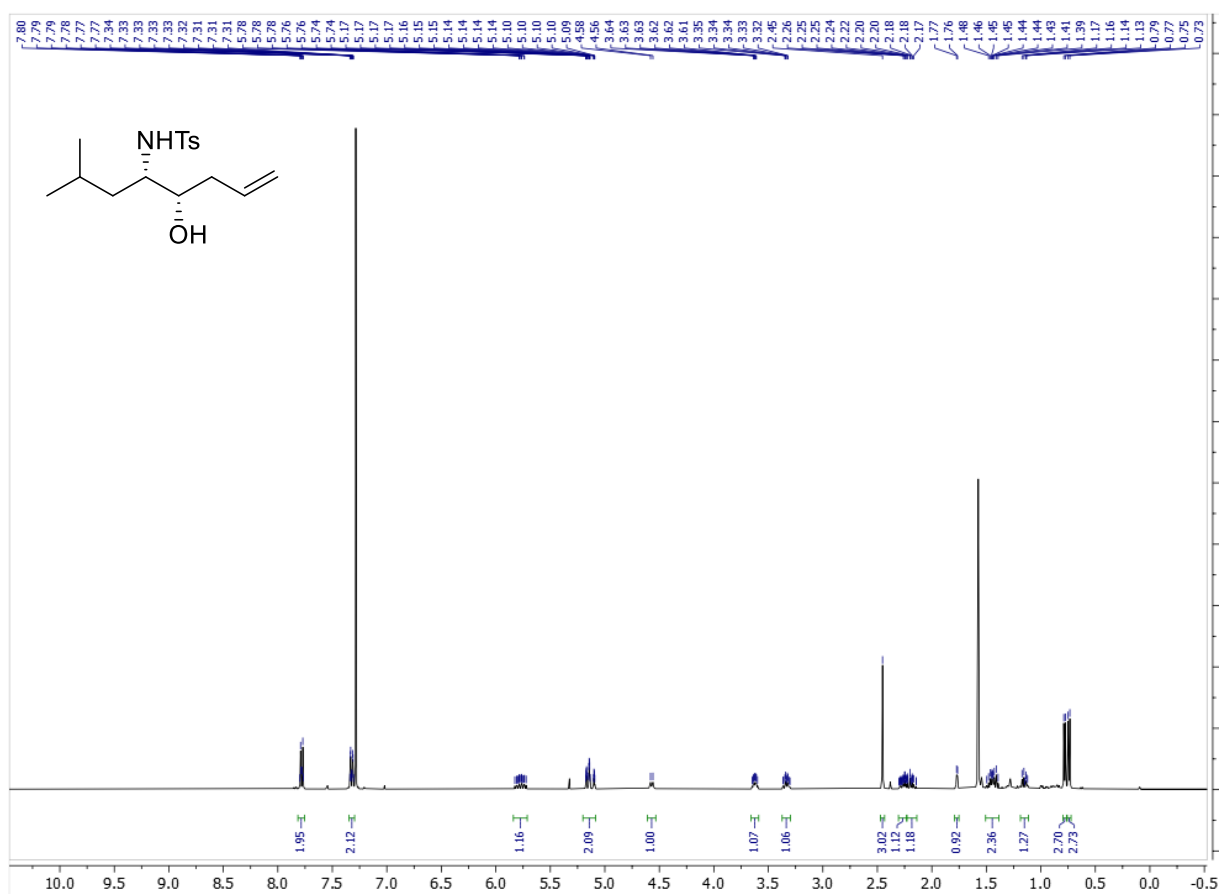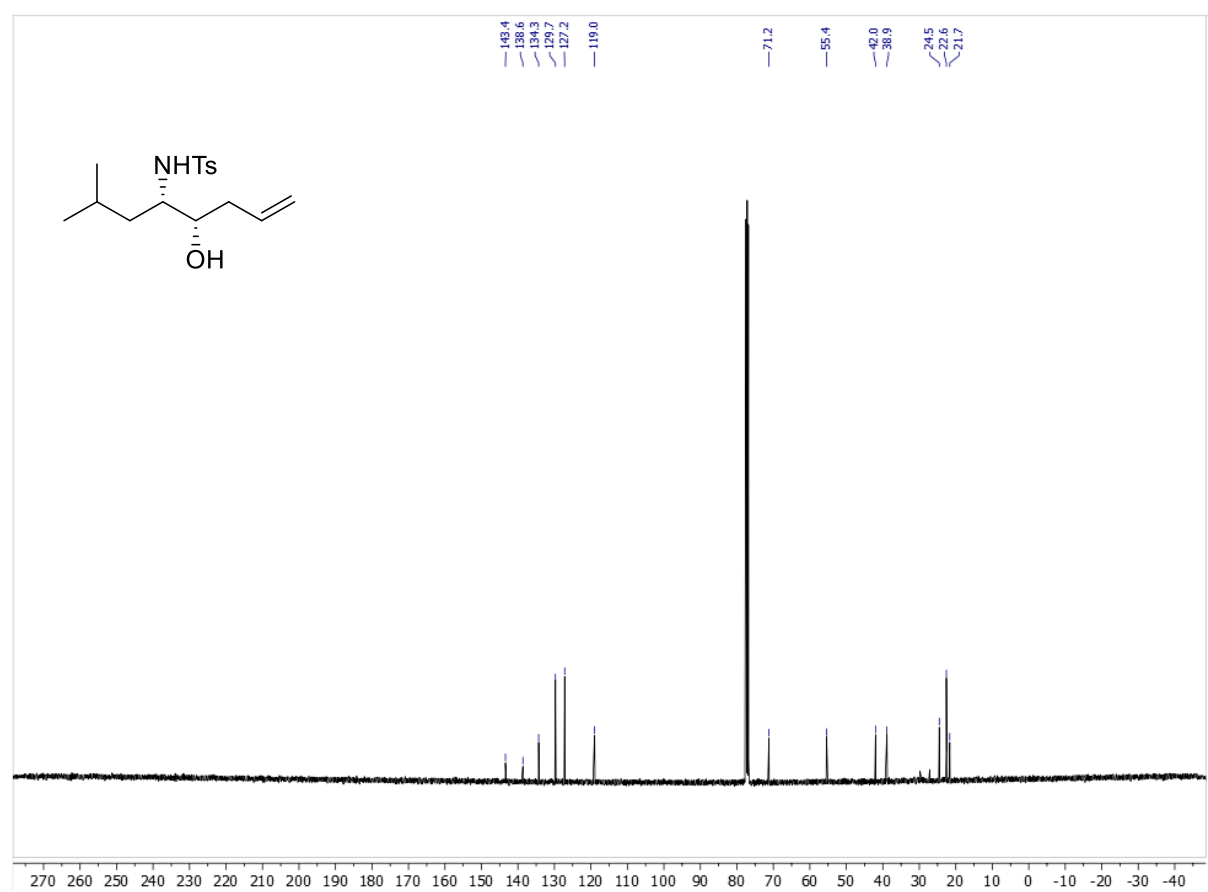

$^1\text{H}$  NMR (400 MHz,  $\text{CDCl}_3$ ; top) and  $^{13}\text{C}$  NMR (101 MHz,  $\text{CDCl}_3$ ; bottom) of compound **29**

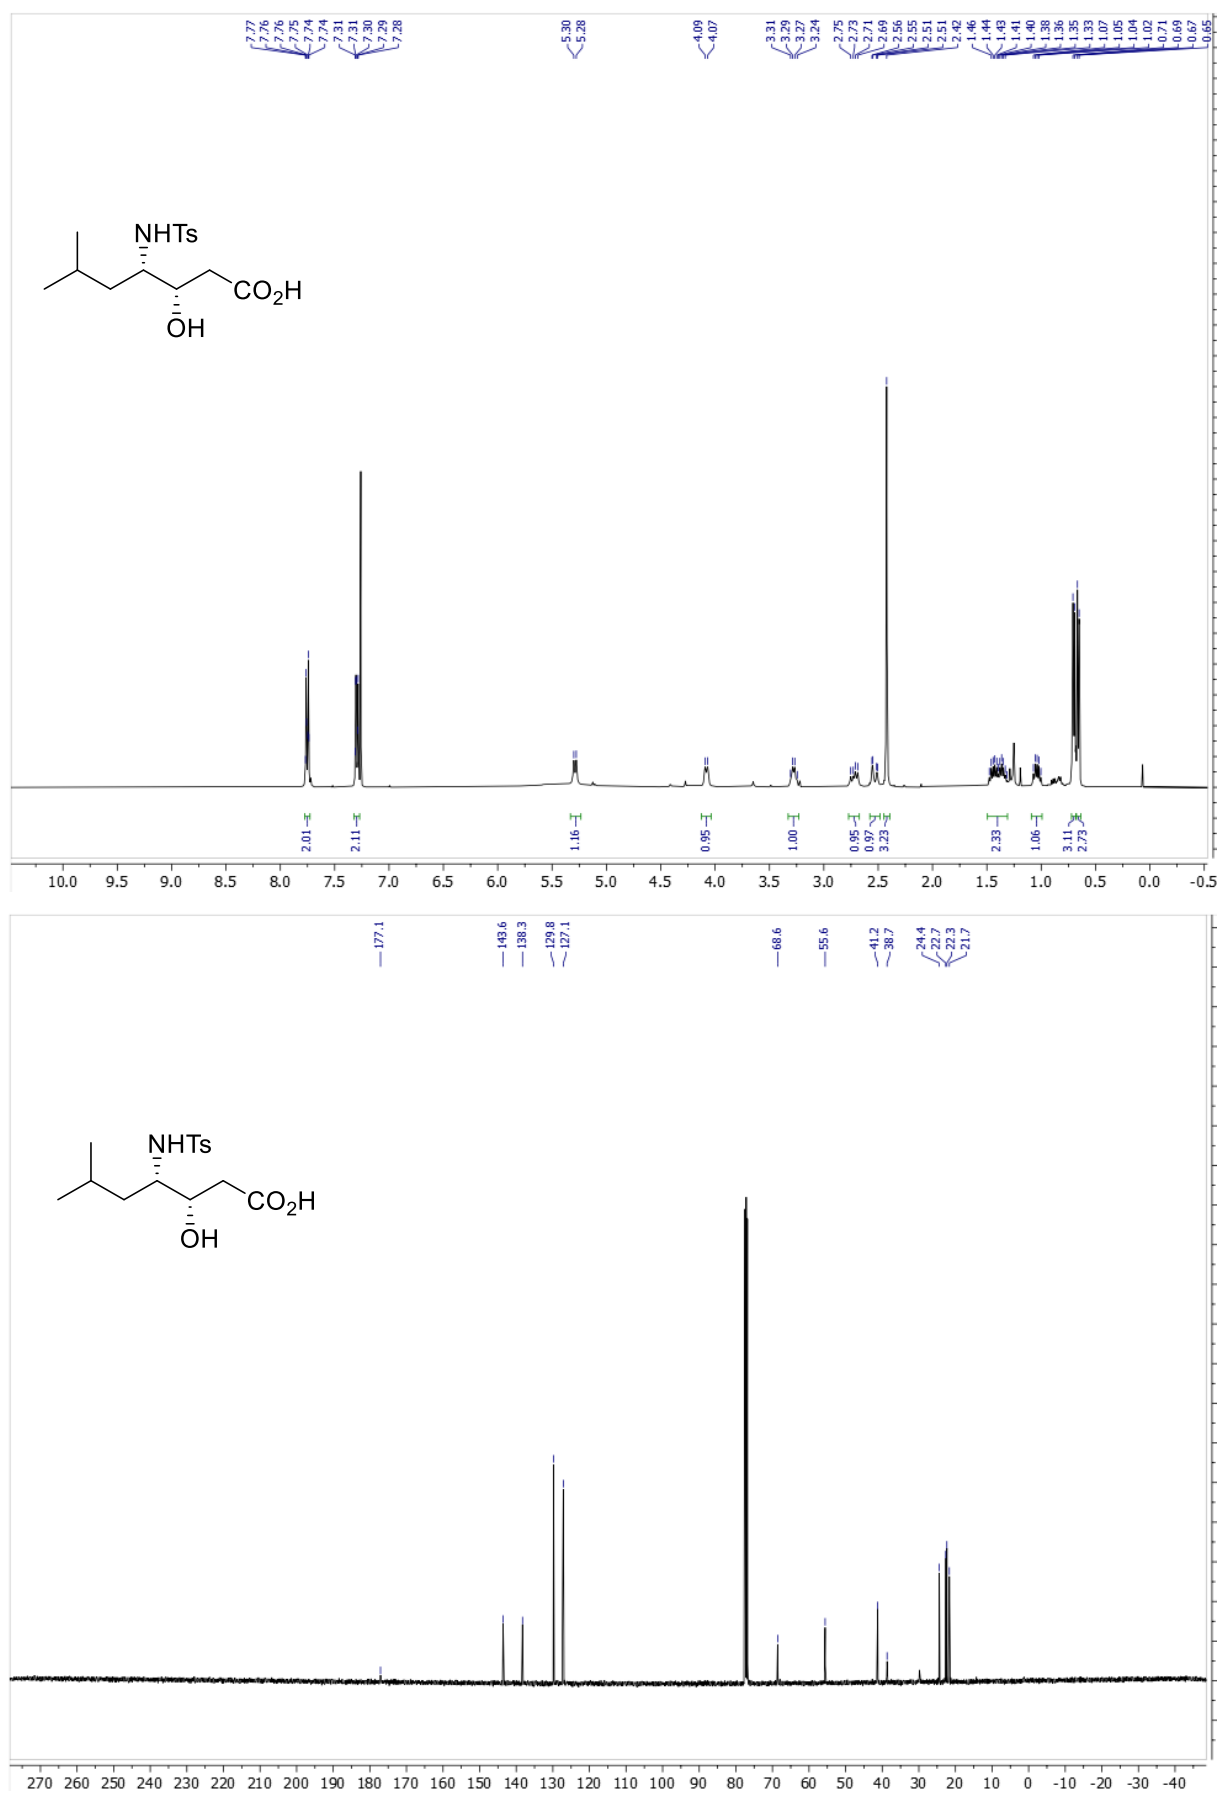

$^1\text{H}$  NMR (400 MHz,  $\text{D}_2\text{O}$ ; top) and  $^{13}\text{C}$  NMR (101 MHz,  $\text{D}_2\text{O}$ ; bottom) of compound **30**

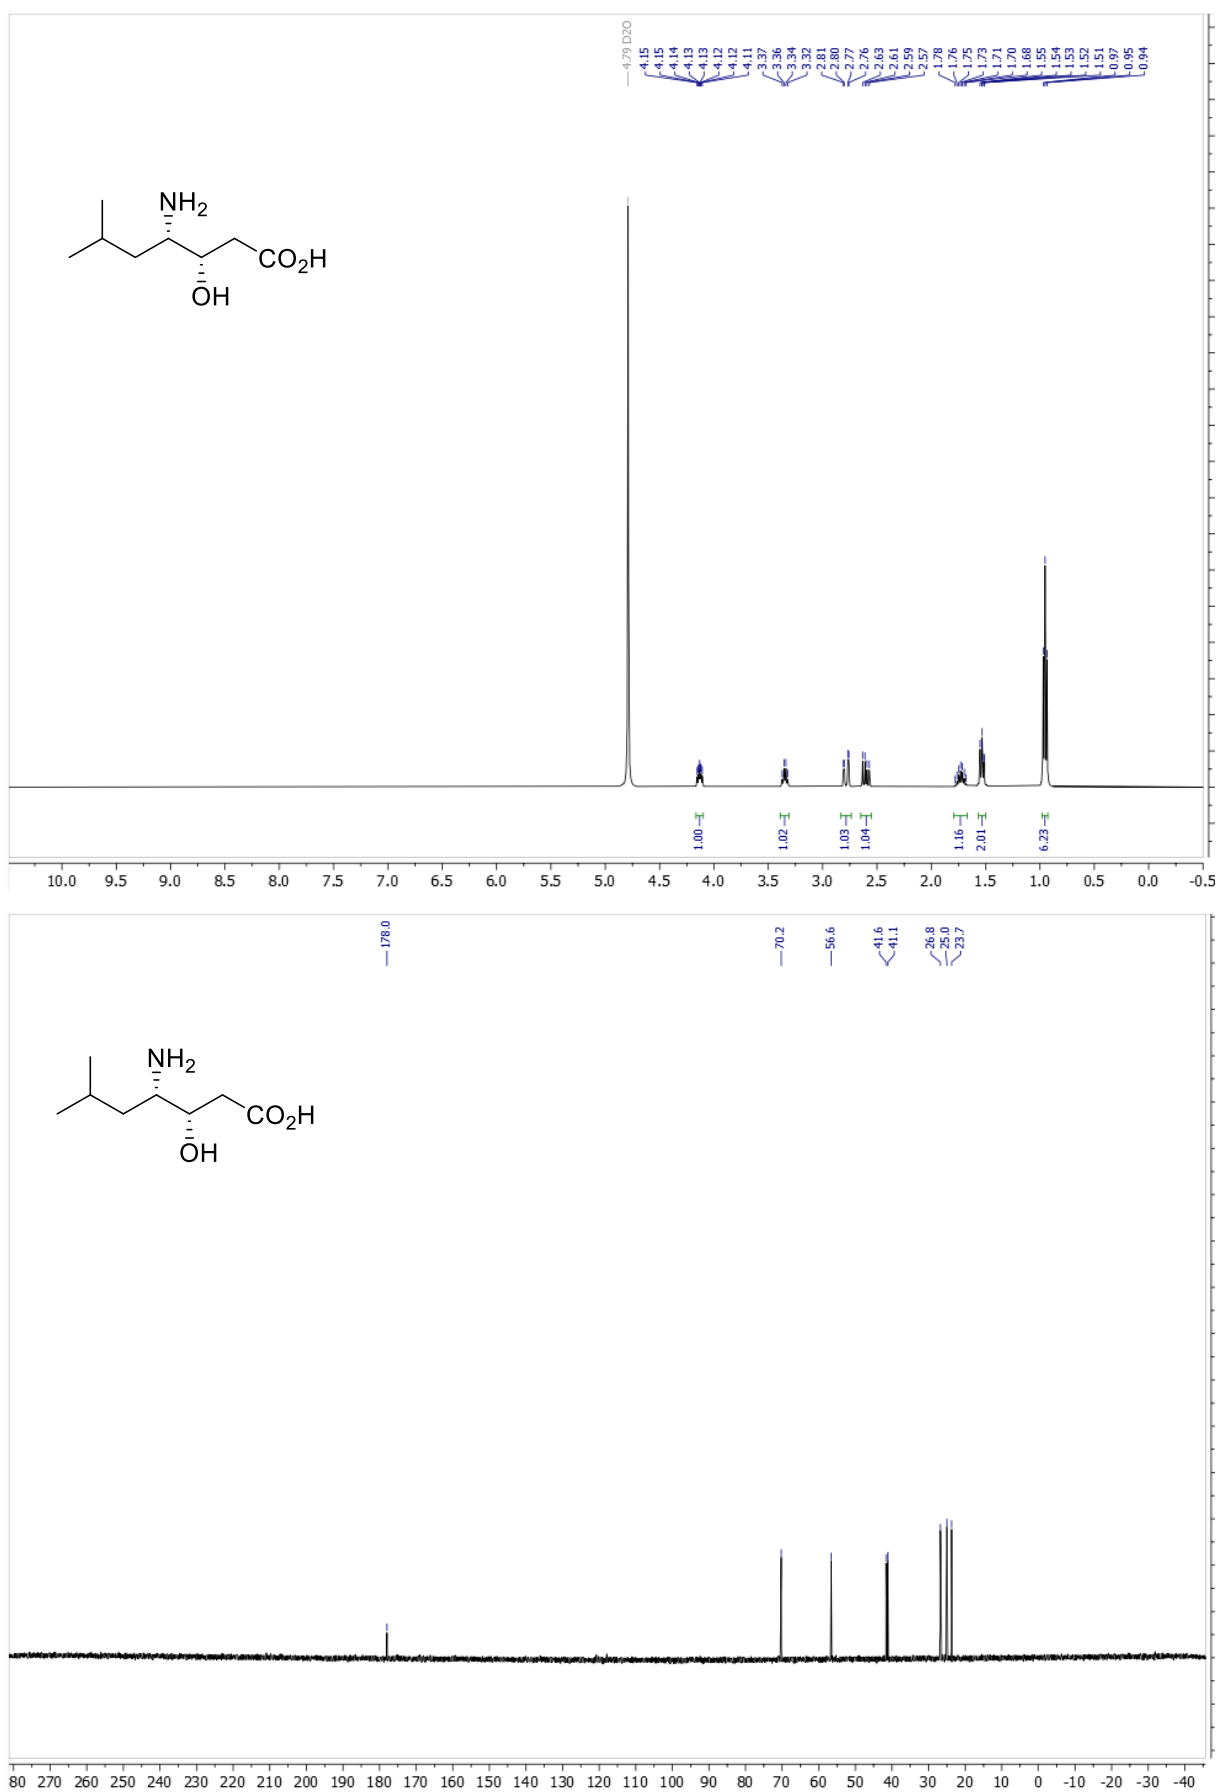

## References

1. Davies, T. Q.; Kim, J. Y.; Fürstner, A. Nickel-Catalyzed Enantioselective Coupling of Aldehydes and Electron-Deficient 1,3-Dienes Following an Inverse Regiochemical Course. *J. Am. Chem. Soc.* **2022**, *144*, 18817–18822.
2. Morales, S.; Guijarro, F. G.; Ruano, J. L. G.; Cid, M. B. A General Aminocatalytic Method for the Synthesis of Aldimines. *J. Am. Chem. Soc.* **2014**, *136*, 1082–1089.
3. Boulton, T.; Affron, D. P.; Trowbridge, A. D.; Bull, J. A. Synthesis of *cis*-C-Iodo-*N*-Tosyl-Aziridines using Diisodomethylithium: Reaction Optimization, Product Scope and Stability, and a Protocol for Selection of Stationary Phase for Chromatography. *J. Org. Chem.* **2013**, *78*, 6632–6647.
4. Davies, T. Q.; Murphy, J. J.; Dousset, M.; Fürstner, A. Nickel-Catalyzed Enantioselective Synthesis of Pre-Differentiated Homoallylic *syn*- or *anti*-1,2-Diols from Aldehydes and Dienol Ethers. *J. Am. Chem. Soc.* **2021**, *143*, 13489–13494.
5. Yoo, D.; Oh, J. S.; Kim, Y. G. The *N*-Hydroxymethyl Group for Stereoselective Conjugate Addition: Application to the Synthesis of (–)-Statine. *Org. Lett.* **2002**, *4*, 1213–1215.
6. Cai, H.; Zhou, Y.; Zhang, D.; Xu, J.; Liu, H. A Mannich/cyclization cascade process for the asymmetric synthesis of spirocyclic thioimidazolidineoxindoles. *Chem. Commun.* **2014**, *50*, 14771–14774.
7. Yang, J.; Chatelet, B.; Ziarelli, F.; Dufaud, V.; Herault, D.; Martinez, A. Verkade's Superbase as an Organocatalyst for the Strecker Reaction. *Eur. J. Org. Chem.* **2018**, 6328–6332.
8. Ueno, S.; Ohtsubo, M.; Kuwano, R. [4+2] Cycloaddition of *o*-Xylylenes with Imines Using Palladium Catalyst. *J. Am. Chem. Soc.* **2009**, *131*, 12904–12905.
9. Wipf, P.; Kendall, C.; Stephenson, C. R. J. Dimethylzinc-Mediated Additions of Alkenylzirconocenes to Aldimines. New Methodologies for Allylic Amine and *C*-Cyclopropylalkylamine Syntheses. *J. Am. Chem. Soc.* **2003**, *125*, 761–768.
10. Sampath, M.; Lee, P.-Y. B.; Loh, T.-P. Phosphine-catalyzed one-pot isomerization of 3-alkynoates and [2+3]-cycloaddition with imines: formal synthesis of *Securinega* alkaloid (±)-allosecurinine. *Chem. Sci.* **2011**, *2*, 1988–1991.
11. Ushida, N.; Nagai, N.; Adachi, M.; Nishikawa, T. Concise Stereocontrolled Synthesis of an  $\alpha$ -Carbagalactose Segment of RCI-56, a Candidate Anticancer Agent. *Synlett* **2019**, *30*, 977–981.
12. Zhao, J.; Xu, G.; Wang, X.; Liu, J.; Ren, X.; Hong, X.; Lu, Z. Cobalt-Catalyzed Migration Isomerization of Dienes. *Org. Lett.* **2022**, *24*, 4592–4597.
